# Supplementary material for: Cyclization of 5-alkynones with chromium alkylidene equivalents generated in situ from gem-dichromiomethanes
Source: Royal Society of Chemistry journal article supplement (doi:10.1039/d0cc03986a), 2020-01-01

## Electronic Supplementary Information

### Cyclization of 5-Alkynones with Chromium Alkylidene Equivalents Generated *in situ* from *gem*-Dichromiomethanes

Masahito Murai,<sup>\*,†,‡</sup> Ryuji Taniguchi,<sup>†</sup> Takashi Kurogi<sup>†</sup>

Shunsuke Moritani,<sup>†</sup> and Kazuhiko Takai<sup>\*,†</sup>

<sup>†</sup>*Division of Applied Chemistry, Graduate School of Natural Science and Technology,*

*Okayama University, Okayama 700-8530, Japan*

<sup>‡</sup>*Department of Chemistry, Graduate School of Science,*

*Nagoya University, Nagoya 464-8602, Japan*

E-mail: [masahito.murai@chem.nagoya-u.ac.jp](mailto:masahito.murai@chem.nagoya-u.ac.jp)

[.ktakai@cc.okayama-u.ac.jp](mailto:ktakai@cc.okayama-u.ac.jp)

#### Table of Contents

|                                                                                                              |     |
|--------------------------------------------------------------------------------------------------------------|-----|
| 1. General Methods                                                                                           | S2  |
| 2. Procedure for the Preparation of Diethyl 2-(2-Oxopropyl)-<br>2-(2-propyn-1-yl)-malonate ( <i>pre-1a</i> ) | S2  |
| 3. General Procedure for Chromium-Mediated Cyclization of<br>5-Alkynylketones                                | S6  |
| 4. Procedure for the Preparation of [CrCl(dme)](-CHSiMe <sub>3</sub> )(-Cl) <sub>2</sub> ( <b>4</b> ).       | S10 |
| 5. X-ray Crystallographic Studies of [CrCl(dme)](μ-CHSiMe <sub>3</sub> )(μ-Cl) <sub>2</sub> ( <b>4</b> )     | S11 |
| 6. References                                                                                                | S12 |
| 7. <sup>1</sup> H NMR and <sup>13</sup> C-NMR Spectra of New Compounds                                       | S14 |

**1. General Methods.** All operations were performed in a Vac. glove box under a dinitrogen atmosphere or using standard Schlenk techniques under an argon atmosphere. Anhydrous hexane and stabilizer-free THF were purchased from FUJIFILM Wako Pure Chemical. Anhydrous and stabilizer-free DME was purchased from Kanto Chemical. All anhydrous solvents were stored over activated 4 Å molecular sieves and degassed with an argon gas for 20 min before use. Unless otherwise noted, other chemicals obtained from commercial suppliers were used without further purification. CrCl<sub>2</sub> (anhydrous, powder, 99.99% trace metals basis) was purchased from Sigma-Aldrich. Manganese powder (99.9% trace metals basis) was purchased from Kojundo Chemical Laboratory. (Diodomethyl)trimethylsilane was prepared according to the reported procedure.<sup>1</sup> <sup>1</sup>H (400 MHz) and <sup>13</sup>C (100 MHz) NMR spectra were recorded on a JEOL ECS-400 spectrometer. Proton chemical shifts were reported in ppm based on the solvent resonance resulting from incomplete deuteration (CDCl<sub>3</sub> at 7.26 ppm) as the internal standard. <sup>13</sup>C NMR was recorded with complete proton decoupling, and the chemical shifts were reported in ppm relative to CDCl<sub>3</sub> at 77.00 ppm as an internal standard. The following abbreviations are used; s: singlet, d: doublet, t: triplet, q: quartet, quint: quintet, m: multiplet. High-resolution mass spectra (HRMS) were measured by fast atom bombardment (FAB) using a double focusing magnetic sector mass spectrometer (JEOL JMS-700 MStation FAB-MS). Melting points were measured on a Yanaco micromelting point apparatus and are uncorrected. Elemental analyses were carried out with a Perkin-Elmer 2400 CHN elemental analyzer at Okayama University. Solution state magnetic susceptibility was measured by Evans' method<sup>2</sup> in DME with tetramethylsilane. Corrections were applied for diamagnetism calculated for Pascal constants.<sup>3</sup>

**2. Procedure for the Preparation of Diethyl 2-(2-Oxopropyl)-2-(2-propyn-1-yl)-malonate (*pre-1a*).** To a mixture of NaH (300 mg, 7.5 mmol) in DMF (65 mL) was treated

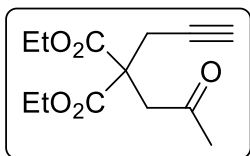

with diethyl 2-(2-propyn-1-yl)malonate (911 mg, 5.0 mmol) at 0 °C, and stirred at 25 °C for 1 h. Bromoacetone (822 mg, 6.0 mmol) was added dropwisely at 0 °C, and stirred at 25 °C for further 24 h. The

reaction mixture was quenched with H<sub>2</sub>O (30 mL), and extracted with EtOAc (30 mL × 3). The combined organic extracts was washed with brine, dried over MgSO<sub>4</sub>, filtered, and concentrated under reduced pressure. Purification by flash column chromatography on silica gel with hexane / EtOAc = 10 / 1 as the eluent afforded *pre-1a* (569 mg, 2.2 mmol, 45% yield) as a colorless oil. <sup>1</sup>H NMR (400 MHz, CDCl<sub>3</sub>): δ 1.24 (t, *J* = 6.8 Hz, 6H), 2.01 (t, *J* = 2.8 Hz, 1H), 2.19 (s, 3H), 3.01 (d, *J* = 2.8 Hz, 2H), 3.35 (s, 2H), 4.20 (q, *J* = 6.8 Hz, 4H). <sup>13</sup>C NMR (100 MHz, CDCl<sub>3</sub>): δ 13.9, 23.1, 30.2, 45.2, 54.3, 62.0, 71.6, 79.3, 169.0, 205.3. HRMS (FAB<sup>+</sup>): calcd. for C<sub>13</sub>H<sub>19</sub>O<sub>5</sub> ([M+H]<sup>+</sup>) 255.1232; found 255.1232.

**Diethyl 2-(2-Oxo-2-phenylethyl)-2-(2-propyn-1-yl)malonate (*pre-1b*):** Following the

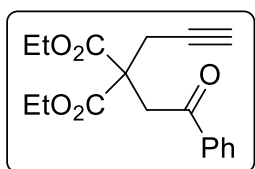

procedure for the synthesis of *pre-1a* using diethyl 2-(prop-2-yn-1-yl)malonate (713 mg, 3.6 mmol) provided 900 mg (2.8 mmol, 79% yield) of *pre-1b* as a colorless oil after purification by flash

chromatography (eluent: hexane / EtOAc = 20 / 1). <sup>1</sup>H NMR (400 MHz, CDCl<sub>3</sub>): δ 1.25 (t, *J* = 7.2 Hz, 6H), 1.99 (t, *J* = 2.8 Hz, 1H), 3.14 (d, *J* = 2.8 Hz, 2H), 3.91 (s, 2H), 4.23 (q, *J* = 7.2 Hz, 2H), 4.24 (q, *J* = 7.2 Hz, 2H), 7.48 (t, *J* = 7.6 Hz, 2H), 7.59 (t, *J* = 7.6 Hz, 1H), 8.01 (d, *J* = 7.6 Hz, 2H). <sup>13</sup>C NMR (100 MHz, CDCl<sub>3</sub>): δ 13.9, 23.2, 40.8, 54.6, 62.0, 71.7, 79.4, 128.1, 128.6, 133.5, 136.4, 169.2, 196.8. HRMS (FAB<sup>+</sup>): calcd. for C<sub>18</sub>H<sub>20</sub>O<sub>5</sub> ([M+H]<sup>+</sup>) 317.1389; found 317.1388.

**Diethyl 2-(1-Oxo-1-phenylpropan-2-yl)-2-(2-propyn-1-yl)malonate (*pre-1c*):** Following the procedure for the synthesis of *pre-1c* using diethyl 2-(prop-2-yn-1-yl)malonate (475 mg, 2.4 mmol) provided 396 mg (1.2 mmol, 50% yield) of *pre-1c* as a pale yellow oil after

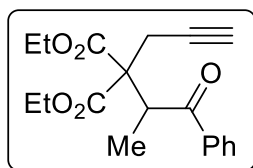

purification by flash chromatography (eluent: hexane / EtOAc = 20 /

1).  $^1\text{H}$  NMR (400 MHz,  $\text{CDCl}_3$ ):  $\delta$  1.23 (t,  $J = 7.2$  Hz, 3H), 1.25 (t,  $J = 7.2$  Hz, 3H), 1.44 (d,  $J = 7.2$  Hz, 3H), 2.06 (t,  $J = 2.8$  Hz, 1H),

3.00 (dd,  $J = 2.8, 17.2$  Hz, 1H), 3.07 (dd,  $J = 2.8, 17.2$  Hz, 1H), 4.20-4.28 (m, 4H), 4.46 (q,  $J = 7.2$  Hz, 1H), 7.47 (t,  $J = 7.2$  Hz, 2H), 7.57 (tt,  $J = 1.6, 7.2$  Hz, 1H), 7.99 (dd,  $J = 1.6, 7.2$  Hz, 2H).  $^{13}\text{C}$  NMR (100 MHz,  $\text{CDCl}_3$ ):  $\delta$  13.86, 13.89, 14.6, 23.6, 43.8, 58.4, 61.75, 61.8, 71.6, 79.4, 128.5, 128.6, 133.1, 136.1, 169.8, 201.6. HRMS (FAB $^+$ ): calcd. for  $\text{C}_{19}\text{H}_{23}\text{O}_5$  ( $[\text{M}+\text{H}]^+$ ) 331.1545; found 331.1548.

**Diethyl 2-(1-Oxo-1,2,3,4-tetrahydronaphthalen-2-yl)-2-(2-propyn-1-yl)malonate (*pre-1d*)**

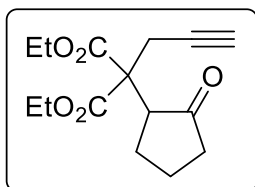

**1d**): Following the procedure for the synthesis of *pre-1a* using diethyl 2-(2-propyn-1-yl)malonate (496 mg, 2.5 mmol) provided 315 mg (1.1 mmol, 45% yield) of *pre-1d* as a pale yellow oil after

purification by flash chromatography (eluent: hexane / EtOAc = 10 / 1).  $^1\text{H}$  NMR (400 MHz,  $\text{CDCl}_3$ ):  $\delta$  1.270 (t,  $J = 7.2$  Hz, 3H), 1.275 (t,  $J = 7.2$  Hz, 3H), 1.70-1.84 (m, 1H), 1.91-2.00 (m, 1H), 2.04 (t,  $J = 2.8$  Hz, 1H), 2.04-2.11 (m, 1H), 2.21-2.38 (m, 3H), 2.85 (dd,  $J = 2.8, 16.8$  Hz, 1H), 2.95 (dd,  $J = 9.2, 12.4$  Hz, 1H), 3.01 (dd,  $J = 2.8, 16.8$  Hz, 1H), 4.19-4.27 (m, 4H).  $^{13}\text{C}$  NMR (100 MHz,  $\text{CDCl}_3$ ):  $\delta$  13.92, 13.95, 20.6, 24.2, 26.7, 38.0, 52.3, 57.9, 61.8, 61.9, 71.3, 79.7, 169.0, 169.6, 216.4. HRMS (FAB $^+$ ): calcd. for  $\text{C}_{15}\text{H}_{21}\text{O}_5$  ( $[\text{M}+\text{H}]^+$ ) 281.1389; found 281.1393.

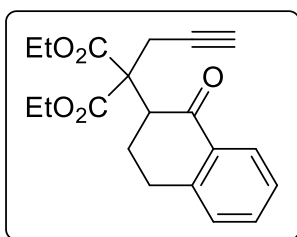

**Diethyl 2-(1-Oxo-1,2,3,4-tetrahydronaphthalen-2-yl)-2-(2-propyn-1-yl)malonate (*pre-1e*)**: Following the procedure for the synthesis of *pre-1a* using diethyl 2-(2-propyn-1-yl)malonate (911 mg, 5.0 mmol) provided 703 mg (2.1 mmol, 41% yield) of *pre-1e*

as a colorless solid after purification by flash chromatography (eluent: hexane / EtOAc =

10 / 1). mp 56.8-57.5 °C. <sup>1</sup>H NMR (400 MHz, CDCl<sub>3</sub>): δ 1.22 (t, *J* = 6.8 Hz, 3H), 1.28 (t, *J* = 6.8 Hz, 3H), 2.00 (t, *J* = 2.8 Hz, 1H), 2.30 (dd, *J* = 2.8, 18.0 Hz, 1H), 2.45-2.49 (m, 1H), 2.90 (dd, *J* = 2.8, 18.0 Hz, 1H), 3.00-3.18 (m, 2H), 3.24 (dd, *J* = 2.8, 18.0 Hz, 1H), 3.68 (dd, *J* = 3.6, 13.2 Hz, 1H), 4.22 (q, *J* = 6.8 Hz, 2H), 4.27 (q, *J* = 6.8 Hz, 2H), 7.26-7.30 (m, 2H), 7.47 (t, *J* = 7.6 Hz, 1H), 8.00 (d, *J* = 7.6 Hz, 1H). <sup>13</sup>C NMR (100 MHz, CDCl<sub>3</sub>): δ 13.9, 22.8, 26.7, 30.0, 52.9, 57.9, 61.8, 71.3, 80.4, 126.6, 127.5, 128.5, 132.5, 133.4, 143.6, 169.3, 169.4, 196.7. HRMS (FAB<sup>+</sup>): calcd. for C<sub>20</sub>H<sub>23</sub>O<sub>5</sub> ([M+H]<sup>+</sup>) 343.1545; found 343.1540.

**2-(2-Oxopropyl)-2-(prop-2-yn-1-yl)-1*H*-indene-1,3-dione** (*pre-1g*): Following the

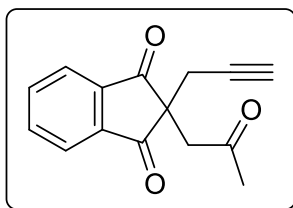

procedure for the synthesis of *pre-1a* using 2-(prop-2-yn-1-yl)-1*H*-indene-1,3-dione (589 mg, 3.2 mmol) provided 361 mg (1.5 mmol, 47% yield) of *pre-1g* as a yellow solid after purification by flash chromatography (eluent: hexane / EtOAc = 10 / 1). mp

110.9-111.8 °C. <sup>1</sup>H NMR (400 MHz, CDCl<sub>3</sub>): δ 1.90 (t, *J* = 2.8 Hz, 1H), 2.07 (s, 3H), 2.51 (d, *J* = 2.8 Hz, 1H), 1.91-2.00 (m, 1H), 2.04 (t, *J* = 2.8 Hz, 1H), 7.83 (dd, *J* = 2.8, 6.0 Hz, 2H), 7.97 (dd, *J* = 2.8, 6.0 Hz, 2H). <sup>13</sup>C NMR (100 MHz, CDCl<sub>3</sub>): δ 24.3, 28.6, 48.0, 52.9, 72.9, 77.1, 123.1, 135.4, 141.8, 201.0, 204.7. HRMS (FAB<sup>+</sup>): calcd. for C<sub>15</sub>H<sub>13</sub>O<sub>3</sub> ([M+H]<sup>+</sup>) 241.0865; found 241.0874.

**Tetraethyl 11-Oxododeca-1,6-diyne-4,4,9,9-tetracarboxylate** (*pre-2*): Following the

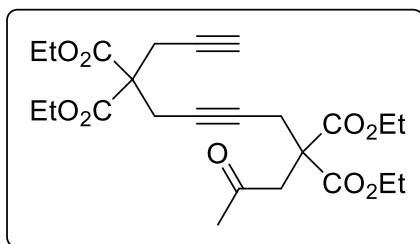

procedure for the synthesis of *pre-1a* using tetraethyl nona-3,8-diyne-1,1,6,6-tetracarboxylate (326 mg, 0.80 mmol) provided 123 mg (0.26 mmol, 33% yield) of *pre-2* as a colorless oil after purification by flash

chromatography (eluent: hexane / EtOAc = 5 / 1). <sup>1</sup>H NMR (400 MHz, CDCl<sub>3</sub>): δ 1.25 (t, *J*

= 6.8 Hz, 6H), 1.28 (t,  $J = 6.8$  Hz, 6H), 1.58 (s, 3H), 1.99 (d,  $J = 2.4$  Hz, 1H), 2.71 (t,  $J = 2.4$  Hz, 1H), 2.73 (t,  $J = 2.4$  Hz, 1H), 2.91 (d,  $J = 2.4$  Hz, 2H), 2.90-2.93 (m, 5H), 3.47 (t,  $J = 8.0$  Hz, 1H), 4.17-4.26 (m, 8H).  $^{13}\text{C}$  NMR (100 MHz,  $\text{CDCl}_3$ ):  $\delta$  13.99, 14.02, 18.7, 22.4, 22.7, 51.2, 56.5, 61.7, 61.9, 71.4, 76.3, 78.7, 79.4, 167.9, 168.7. HRMS (FAB $^+$ ): calcd. for  $\text{C}_{24}\text{H}_{33}\text{O}_9$  ( $[\text{M}+\text{H}]^+$ ) 465.2125; found 465.2106.

**3. General Procedure for Chromium-Mediated Cyclization of 5-Alkynones.** In a nitrogen-filled glovebox, a flame-dried Schlenk flask was charged with  $\text{CrCl}_2$  (98.3 mg, 0.80 mmol). The flask was removed from the glovebox, and subsequently treated with (diiodomethyl)trimethylsilane (136.0 mg, 0.40 mmol), manganese (65.9 mg, 1.2 mmol) and DME (2.0 mL) at 25 °C. After stirring for 30 min, 5-alkynones (0.20 mmol) was added to the resulting brown reaction mixture, and further stirred at 70 °C for 20 h. The resulting mixture was quenched with water (10 mL), and extracted with  $\text{Et}_2\text{O}$  for three times (10 mL  $\times$  3). The combined organic extracts were washed with brine, dried over  $\text{Na}_2\text{SO}_4$ , and filtered. The solvent was removed under reduced pressure, and the residue was subjected to flash column chromatography on silica gel to afford the corresponding ethenylcyclopentenes **1** and **2**.

**Diethyl (E)-3-Methyl-4-(2-(trimethylsilyl)vinyl)-3-cyclopentene-1,1-dicarboxylate**

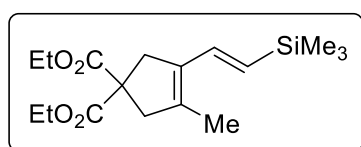

**(1a):** Following the general procedure using diethyl 2-(2-oxopropyl)-2-(2-propyn-1-yl) malonate (*pre-1a*) (50.8 mg, 0.20 mmol) and (diiodomethyl)trimethylsilane (136.0 mg, 0.40 mmol) provided 51.9 mg (0.16 mmol, 80% yield) of **1a** as a colorless oil after purification by flash chromatography (eluent: hexane /  $\text{EtOAc} = 50 / 1$ ).  $^1\text{H}$  NMR (400 MHz,  $\text{CDCl}_3$ ):  $\delta$  0.09 (s, 9H), 1.25 (t,  $J = 7.2$  Hz, 3H), 1.79 (s, 3H), 3.07 (s, 2H), 3.15 (s, 2H), 4.19 (q,  $J = 7.2$  Hz, 4H), 5.70 (d,  $J = 18.8$  Hz), 6.74 (d,  $J = 18.8$  Hz).  $^{13}\text{C}$  NMR (100

MHz, CDCl<sub>3</sub>):  $\delta$  -1.2, 13.5, 14.0, 40.7, 46.6, 56.8, 61.5, 129.6, 132.7, 134.9, 136.8, 172.2.

HRMS (FAB<sup>+</sup>): calcd. for C<sub>17</sub>H<sub>28</sub>O<sub>4</sub>Si ([M+H]<sup>+</sup>) 325.1835; found 325.1821.

**Diethyl (E)-3-Phethyl-4-(2-(trimethylsilyl)vinyl)-3-cyclopentene-1,1-dicarboxylate**

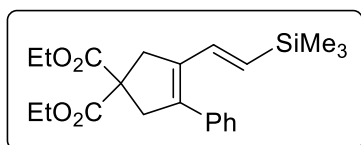

**(1b)**: Following the general procedure using diethyl

2-(2-oxo-2-phenylethyl)-2-(2-propyn-1-yl)malonate (*pre-1b*)

(63.2 mg, 0.20 mmol) and (diiodomethyl)trimethylsilane

(136.0 mg, 0.40 mmol) provided 57.2 mg (0.15 mmol, 74% yield) of **1b** as a colorless oil

after purification by flash chromatography (eluent: hexane / EtOAc = 50 / 1). <sup>1</sup>H NMR

(400 MHz, CDCl<sub>3</sub>):  $\delta$  0.58 (s, 9H), 1.27 (t, *J* = 7.6 Hz, 6H), 3.36 (s, 2H), 3.51 (s, 2H), 4.23

(q, *J* = 7.6 Hz, 4H), 5.91 (d, *J* = 18.8 Hz, 1H), 6.89 (d, *J* = 18.8 Hz, 1H), 7.28-7.38 (m, 5H).

<sup>13</sup>C NMR (100 MHz, CDCl<sub>3</sub>):  $\delta$  -1.3, 14.1, 41.5, 45.3, 56.8, 61.7, 127.4, 128.2, 128.3,

132.7, 134.6, 136.4, 136.9, 137.9, 172.0. HRMS (FAB<sup>+</sup>): calcd. for C<sub>22</sub>H<sub>31</sub>O<sub>4</sub>Si ([M+H]<sup>+</sup>)

387.1992; found 387.1983.

**Diethyl (E)-2-Methyl-3-phethyl-4-(2-(trimethylsilyl)vinyl)-3-cyclopentene-1,1-di-**

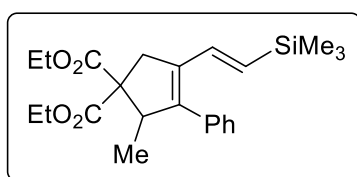

**carboxylate (1c)**: Following the general procedure using

diethyl 2-(1-oxo-1-phenylpropan-2-yl)-2-(2-propyn-1-yl)-

malonate (*pre-1c*) (66.1 mg, 0.20 mmol) and (diiodo-

methyl)trimethylsilane (136.0 mg, 0.40 mmol) provided 56.9 mg (0.14 mmol, 71% yield)

of **1c** as a pale yellow oil after purification by flash chromatography (eluent: hexane /

EtOAc = 10 / 1). <sup>1</sup>H NMR (400 MHz, CDCl<sub>3</sub>):  $\delta$  0.04 (s, 9H), 0.91 (d, *J* = 7.2 Hz, 3H),

1.270 (d, *J* = 7.2 Hz, 3H), 1.274 (d, *J* = 7.2 Hz, 3H), 3.00 (d, *J* = 14.0 Hz, 1H), 3.63 (d, *J* =

14.0 Hz, 1H), 4.02 (q, *J* = 7.2 Hz, 1H), 4.14-4.31 (m, 4H), 5.86 (d, *J* = 19.2 Hz, 1H), 6.74

(d, *J* = 19.2 Hz, 1H), 7.28-7.37 (m, 5H). <sup>13</sup>C NMR (100 MHz, CDCl<sub>3</sub>):  $\delta$  -1.3, 14.0, 14.1,

14.5, 39.2, 49.1, 61.3, 61.5, 62.0, 127.4, 128.2, 129.0, 132.0, 133.1, 135.8, 138.2, 143.7,

170.3, 172.2. HRMS (FAB<sup>+</sup>): calcd. for C<sub>23</sub>H<sub>32</sub>O<sub>4</sub>Si ([M]<sup>+</sup>) 400.2070; found 400.2070.

**Bicycle 1d:** Following the general procedure using diethyl 2-(1-oxo-1,2,3,4-tetrahydro-

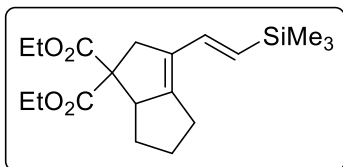

naphthalen-2-yl)-2-(2-propyn-1-yl)malonate (*pre-1d*) (56.1 mg, 0.20 mmol) and (diiodomethyl)trimethylsilane (136.0 mg, 0.40 mmol) provided 52.6 mg (0.15 mmol, 75% yield) of **1d**

as a pale yellow oil after purification by flash chromatography (eluent: hexane / EtOAc = 10 / 1). <sup>1</sup>H NMR (400 MHz, CDCl<sub>3</sub>): δ 0.07 (s, 9H), 0.99-1.11 (m, 1H), 1.23 (t, *J* = 7.2 Hz, 3H) 1.25 (t, *J* = 7.2 Hz, 3H), 1.86-2.03 (m, 3H), 2.20-2.31 (m, 2H), 3.00 (d, *J* = 16.4 Hz, 1H), 3.56 (d, *J* = 16.4 Hz, 1H), 3.89-3.92 (m, 1H) 4.11-4.26 (m, 4H), 5.66 (d, *J* = 18.8 Hz, 1H), 6.58 (d, *J* = 18.8 Hz, 1H). <sup>13</sup>C NMR (100 MHz, CDCl<sub>3</sub>): δ -1.2, 14.1, 14.2, 22.4, 27.6, 28.1, 44.9, 57.8, 60.3, 61.1, 61.3, 128.0, 129.6, 137.6, 148.7, 170.6, 172.1. HRMS (FAB<sup>+</sup>): calcd. for C<sub>19</sub>H<sub>31</sub>O<sub>4</sub>Si ([M+H]<sup>+</sup>) 351.1992; found 351.1986.

**Tricycle 1e:** Following the general procedure using diethyl 2-(1-oxo-1,2,3,4-tetrahydro-

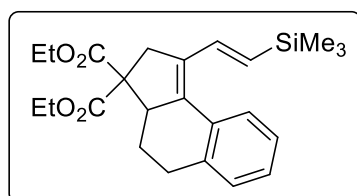

naphthalen-2-yl)-2-(prop-2-yn-1-yl)malonate (*pre-1e*) (68.4 mg, 0.20 mmol) and (diiodomethyl)trimethylsilane (136.0 mg, 0.40 mmol) provided 59.4 mg (0.14 mmol, 72% yield)

of **1e** as a colorless oil after purification by flash chromatography (eluent: hexane / EtOAc = 20 / 1). <sup>1</sup>H NMR (400 MHz, CDCl<sub>3</sub>): δ 0.12 (s, 9H), 1.27 (t, *J* = 7.2 Hz, 3H) 1.28 (t, *J* = 7.2 Hz, 3H), 1.63 (dq, *J* = 5.6, 12.4 Hz, 1H), 2.07-2.14 (m, 1H), 2.89-3.06 (m, 2H), 3.13 (d, *J* = 17.2 Hz, 1H), 3.49 (d, *J* = 17.2 Hz, 1H), 3.86 (dd, *J* = 4.0, 12.4 Hz, 1H) 4.14-4.32 (m, 4H), 5.97 (d, *J* = 18.4 Hz, 1H), 7.13-7.23 (m, 4H), 7.51 (d, *J* = 8.8 Hz, 1H). <sup>13</sup>C NMR (100 MHz, CDCl<sub>3</sub>): δ -1.3, 14.0, 14.1, 26.8, 30.2, 41.8, 51.3, 60.2, 61.3, 61.4, 125.6, 127.4, 128.0, 128.8, 131.8, 132.8, 133.2, 136.0, 137.6, 138.3, 170.5, 172.1. HRMS (FAB<sup>+</sup>): calcd. for C<sub>24</sub>H<sub>33</sub>O<sub>4</sub>Si ([M]<sup>+</sup>) 412.2070; found 412.2080.



**Diethyl (*E*)-3-Methyl-4-(2-(trimethylsilyl)vinyl)-3-cyclopentene-1,1-dicarboxylate (**1f**):**

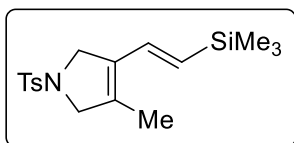

Following the general procedure using 4-methyl-*N*-(2-oxo-propyl)-*N*-(2-propyn-1-yl)benzenesulfonamide (*pre-1f*) (53.1 mg, 0.20 mmol) and (diiodomethyl)trimethylsilane (136.0 mg, 0.40

mmol) provided 42.9 mg (0.13 mmol, 64% yield) of **1f** as a colorless solid after purification by flash chromatography (eluent: hexane / EtOAc = 100 / 1). mp 94.4-95.5 °C. <sup>1</sup>H NMR (400 MHz, CDCl<sub>3</sub>): δ 0.08 (s, 9H), 1.73 (s, 3H), 2.42 (s, 3H), 4.09 (s, 2H), 4.20 (s, 2H), 5.61 (d, *J* = 19.2 Hz, 1H), 6.59 (d, *J* = 19.2 Hz, 1H), 7.27 (d, *J* = 8.4 Hz, 2H), 7.73 (d, *J* = 8.4 Hz, 2H). <sup>13</sup>C NMR (100 MHz, CDCl<sub>3</sub>): δ -1.4, 11.4, 21.5, 55.0, 59.6, 127.5, 129.7, 130.8, 131.4, 132.0, 134.0, 134.1, 143.4. HRMS (FAB<sup>+</sup>): calcd. for C<sub>17</sub>H<sub>25</sub>NO<sub>2</sub>SSi ([M]<sup>+</sup>) 335.1375; found 335.1377.

**Spiocycle 1g:** Following the general procedure using 2-(2-oxopropyl)-2-(prop-2-yn-1-yl)-

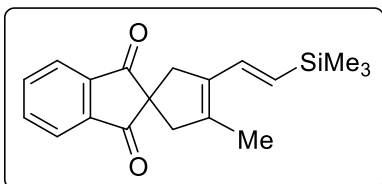

1*H*-indene-1,3-dione (*pre-1g*) (48.1 mg, 0.20 mmol) and (diiodomethyl)trimethylsilane (136.0 mg, 0.40 mmol) provided 373.3 mg (0.12 mmol, 60% yield) of **1g** as a

yellow solid after purification by flash chromatography (eluent: hexane / EtOAc = 5 / 1). mp 105.5-107.1 °C. <sup>1</sup>H NMR (400 MHz, CDCl<sub>3</sub>): δ 0.07 (s, 9H), 1.86 (s, 3H), 2.81 (s, 2H), 2.89 (s, 2H), 5.59 (d, *J* = 19.2 Hz, 1H), 6.80 (d, *J* = 19.2 Hz, 1H), 7.84 (dd, *J* = 2.8, 6.0 Hz, 2H), 7.99 (dd, *J* = 2.8, 6.0 Hz, 2H). <sup>13</sup>C NMR (100 MHz, CDCl<sub>3</sub>): δ -1.2, 13.6, 41.9, 46.7, 56.1, 123.5, 130.0, 133.2, 135.5, 135.7, 136.8, 141.7, 203.6. HRMS (FAB<sup>+</sup>): calcd. for C<sub>19</sub>H<sub>22</sub>O<sub>2</sub>Si ([M]<sup>+</sup>) 310.1389; found 310.1385.

**Conjugated Triene 2:** Following the general procedure using tetraethyl 11-oxododeca-1,6-diyne-4,4,9,9-tetracarboxylate (*pre-2*) (46.4 mg, 0.10 mmol) and (diiodomethyl)trimethylsilane (68.0 mg, 0.20 mmol) provided 34.2 mg (0.064 mmol, 64% yield) of **2** as a yellow

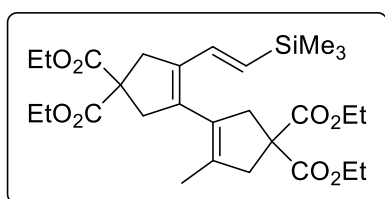

oil after purification by flash chromatography (eluent: hexane / EtOAc = 5 / 1).  $^1\text{H}$  NMR (400 MHz,  $\text{CDCl}_3$ ):  $\delta$  0.06 (s, 9H), 1.245 (t,  $J = 7.2$  Hz, 6H), 1.248 (t,  $J = 7.2$  Hz, 6H), 1.56 (s, 3H), 3.02 (m, 2H), 3.06 (m, 2H),

3.13 (m, 2H), 3.20 (m, 2H), 4.14-4.23 (m, 8H), 5.75 (d,  $J = 19.2$  Hz, 1H), 6.45 (d,  $J = 19.2$  Hz, 1H).  $^{13}\text{C}$  NMR (100 MHz,  $\text{CDCl}_3$ ):  $\delta$  -1.2, 14.0 (two peaks overlapped), 15.3, 40.3, 43.4, 43.8, 45.8, 57.2, 57.8, 61.5, 61.6, 128.2, 130.7, 133.8, 134.2, 135.1, 138.7, 171.96, 172.01. HRMS ( $\text{FAB}^+$ ): calcd. for  $\text{C}_{28}\text{H}_{43}\text{O}_8\text{Si}$  ( $[\text{M}+\text{H}]^+$ ) 535.2727; found 535.2718.

**Diethyl (*E*)-2-(prop-2-yn-1-yl)-2-(3-(trimethylsilyl)allyl)- malonate (3):** Following the

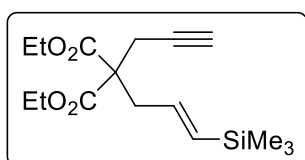

general procedure using diethyl 2-(2-oxoethyl)-2-(prop-2-yn-1-yl)malonate (60.1 mg, 0.25 mmol) provided 58.0 mg (0.16 mmol, 80% yield, ) of **3** as a colorless oil after purification by flash

chromatography (eluent: hexane / EtOAc = 20 / 1). The stereoselectivity was determined to be *cis* / *trans* = >99 / 1 by  $^1\text{H}$  NMR analysis of the crude product.  $^1\text{H}$  NMR (400 MHz,  $\text{CDCl}_3$ ):  $\delta$  0.03 (s, 9H), 1.25 (t,  $J = 7.2$  Hz, 6H), 2.01 (t,  $J = 2.8$  Hz, 1H), 2.78 (d,  $J = 2.8$  Hz, 2H), 2.84 (d,  $J = 5.6$  Hz, 2H), 4.20 (q,  $J = 7.2$  Hz, 4H), 5.81-5.83 (m, 2H).  $^{13}\text{C}$  NMR (100 MHz,  $\text{CDCl}_3$ ):  $\delta$  -1.4, 14.1, 22.7, 39.3, 56.7, 61.6, 71.3, 79.0, 136.6, 139.3, 169.7. HRMS ( $\text{FAB}^+$ ): calcd for  $\text{C}_{16}\text{H}_{27}\text{O}_4\text{Si}$  ( $[\text{M}+\text{H}]^+$ ) 311.1678; found. 311.1660.

**4. Procedure for the Preparation of  $[\text{CrCl}(\text{dme})](\mu\text{-CHSiMe}_3)(\mu\text{-Cl})_2$  (4).** To a pale blue suspension of chromium(II) chloride (1.00 g, 8.14 mmol) in THF (20 mL) was added (diiodomethyl)trimethylsilane (600 mg, 1.76 mmol) at 25 °C. After stirring for 6 h at 25 °C, insoluble materials were removed by centrifugation. The brown supernatant was concentrated to *ca.* 5 mL in *vacuo* and stored at -20 °C for 3 h. Brown insoluble materials were removed by centrifugation again, and the supernatant was dried under reduced

pressure. The residue was dissolved in DME (5.0 mL) and stirred for 10 min at 25 °C. Addition of hexane (10 mL) resulted in the precipitation of a brown solid, and the supernatant was removed by a pipette. The precipitate was washed twice by a mixture of DME (2.0 mL) and hexane (3.0 mL), and dried under reduced pressure to give **4** as a yellowish brown powder (611 mg, 1.19 mmol, 68% yield). Yellowish brown crystals of **4** were grown from a DME solution layer with hexane at 25 °C.  $\mu_{\text{eff}}$  (Evans' method, DME, 25 °C): 6.64  $\mu_{\text{B}}$ . Anal. Calcd. for C<sub>12</sub>H<sub>30</sub>O<sub>4</sub>Cl<sub>4</sub>SiCr<sub>2</sub>: C, 28.14; H, 5.90. Found: C, 27.76; H, 5.97.

**Table S1.** Optimization of reaction conditions

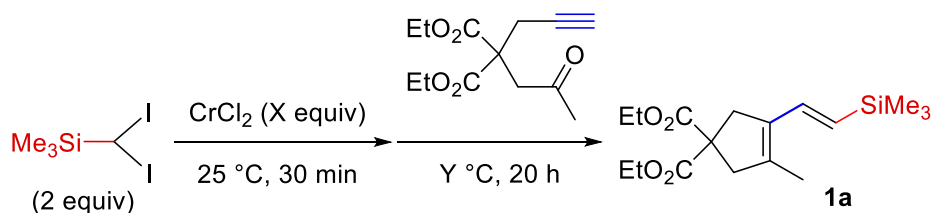

| entry          | X   | solvent | Y  | Yield of <b>1a</b> <sup>a</sup> / % | Recov. <sup>a</sup> / % |
|----------------|-----|---------|----|-------------------------------------|-------------------------|
| 1              | 8   | THF     | 70 | 70                                  | 0                       |
| 2              | 8   | THF     | 50 | 32                                  | 46                      |
| 3              | 8   | THF     | 25 | 0                                   | 93                      |
| 4              | 8   | DME     | 70 | 85                                  | 0                       |
| 5              | 4   | DME     | 70 | 58                                  | 21                      |
| 6 <sup>b</sup> | 4   | DME     | 70 | 82 (80)                             | 0                       |
| 7 <sup>b</sup> | 0.4 | DME     | 70 | 23                                  | 58                      |
| 8 <sup>c</sup> | 8   | DME     | 70 | 0                                   | 0                       |

<sup>a</sup> Determined by <sup>1</sup>H NMR. Isolated yields were in parentheses. <sup>b</sup> Mn (6 equiv) was added. <sup>c</sup> With TMEDA (8 equiv).

**5. X-ray Crystallographic Studies of [CrCl(dme)](μ-CHSiMe<sub>3</sub>)(μ-Cl)<sub>2</sub> Complex **4** (CCDC 2006641):** A yellowish brown crystal of **4** suitable for X-ray analysis was obtained by recrystallization from a DME solution layer with hexane at 25 °C, and placed on the end of a micro-mount coated with NVH oil. The X-ray intensity data collection was carried out on a Rigaku Varimax with a Saturn 944+ CCD area detector using

graphite-monochromated Mo-K $\alpha$  radiation ( $\lambda = 0.71075 \text{ \AA}$ ) at 100(2) K. Details of crystal and data collection parameters are summarized in Table S2. Preliminary indexing was performed from a set of twelve frames. Equivalent reflections were merged, and the collected images were processed by a Rigaku CrystalClear program. The initial structure was determined by the direct method on SHELXS.<sup>4</sup> The further structure determination was performed by Fourier transform method and refined by least squares method on SHELXL.<sup>4</sup> All reflections were used during refinement with the exception of affected reflections by the beam-stopper. Non-hydrogen atoms were refined anisotropically and hydrogen atoms were refined using riding models, except for the methine hydrogen of the CHSiMe<sub>3</sub> ligand. One site occupied by hexane was identified in the asymmetric unit. This site was considerably disordered and was treated by SQUEEZE as a diffuse contribution.<sup>5</sup> In the resulting void space, a contribution of 70 e<sup>-</sup> per unit cell was found and taken to represent 0.5 hexane in the asymmetric unit for each dinuclear complex. This result was checked using the IUCR's CheckCIF routine. The alerts in the output are related to the disordered groups. An ORTEP drawing is shown in Figure 2 in the main text.

## 6. References

1. (a) K. Takai, Y. Kunisada, Y. Tachibana, N. Yamaji and E. Nakatani, *Bull. Chem. Soc. Jpn.*, 2004, **77**, 1581; (b) J. A. Bull and A. B. Charette, *J. Org. Chem.*, 2008, **73**, 8097.
2. (a) D. F. Evans, *J. Chem. Soc.*, 1959, 2003; (b) E. M. Schubert, *J. Chem. Educ.*, 1992, **69**, 62.
3. G. A. Bain and J. F. Berry, *J. Chem. Educ.*, 2008, **85**, 532.
4. (a) G. M. Sheldrick, *Acta Crystallogr.*, 2008, **A64**, 112; (b) G. M. Sheldrick, *Acta Crystallogr.*, 2015, **C71**, 3.
5. (a) P. van der Sluis, A. L. Spek, *Acta Crystallogr.*, 1990, **A46**, 194; (b) A. L. Spek, *Acta Crystallogr.*, 2009, **D65**, 148; (c) A. L. Spek, *Acta Crystallogr.*, 2015, **C71**, 9.

**Table S2.** Summary of Crystallographic Data of [CrCl(dme)]( $\mu$ -CHSiMe<sub>3</sub>)( $\mu$ -Cl)<sub>2</sub> **4**

---

Empirical formula: C<sub>12</sub>H<sub>30</sub>Cl<sub>4</sub>Cr<sub>2</sub>O<sub>4</sub>Si · 0.5(C<sub>6</sub>H<sub>14</sub>)  
Formula weight: 555.33  
Crystal system: monoclinic  
Space group: P2<sub>1</sub> (No. 4)  
Crystal color: yellow  
Lattice parameters:  
 $a$  (Å) = 6.5229(16),  $b$  (Å) = 20.072(5),  $c$  (Å) = 10.299(3)  
 $\beta$  (°) = 104.225(3)  
 $V$  (Å<sup>3</sup>) = 1307.1(6),  $Z$  = 2  
 $D_{\text{calc}}$  (g cm<sup>-3</sup>): 1.411  
Goodness of fit (GOF) = 1.006  
 $F(000)$ : 578  
Temp (°C): -173.0  
Completeness to theta = 27.55°: 99.6 %  
No. of reflections measured total: 14655  
No. of observns ( $I > 3.00\sigma(I)$ ): 5984  
Refinement: Full-Matrix Least-Squares on  $F^2$   
Residuals (all data):  $R_1 = 0.0348$ ,  $wR_2 = 0.0626$   
Max Shift/Error in Final Cycle: 0.010  
Maximum peak in Final Diff Map (e (Å<sup>-3</sup>): 0.322  
Minimum peak in Final Diff Map (e (Å<sup>-3</sup>): -0.439

---

## 7. $^1\text{H}$ NMR and $^{13}\text{C}$ NMR Spectra of New Compounds

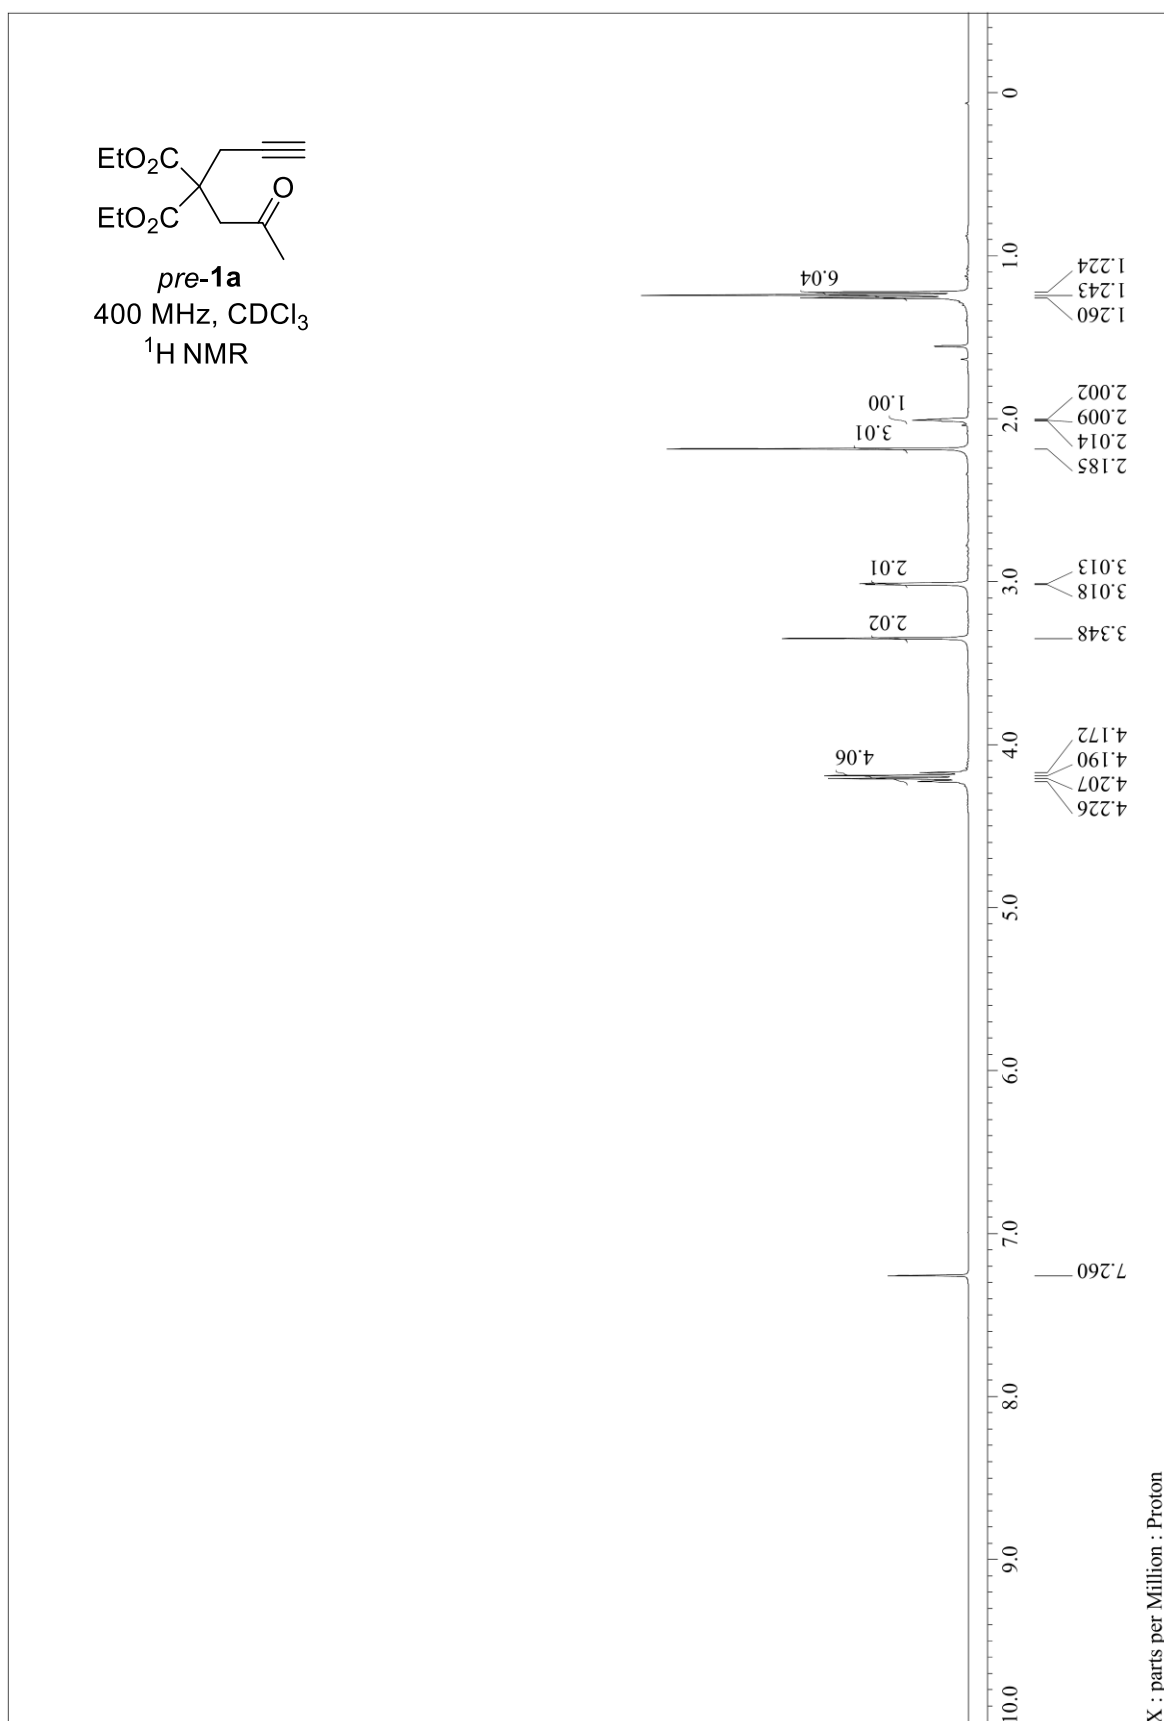

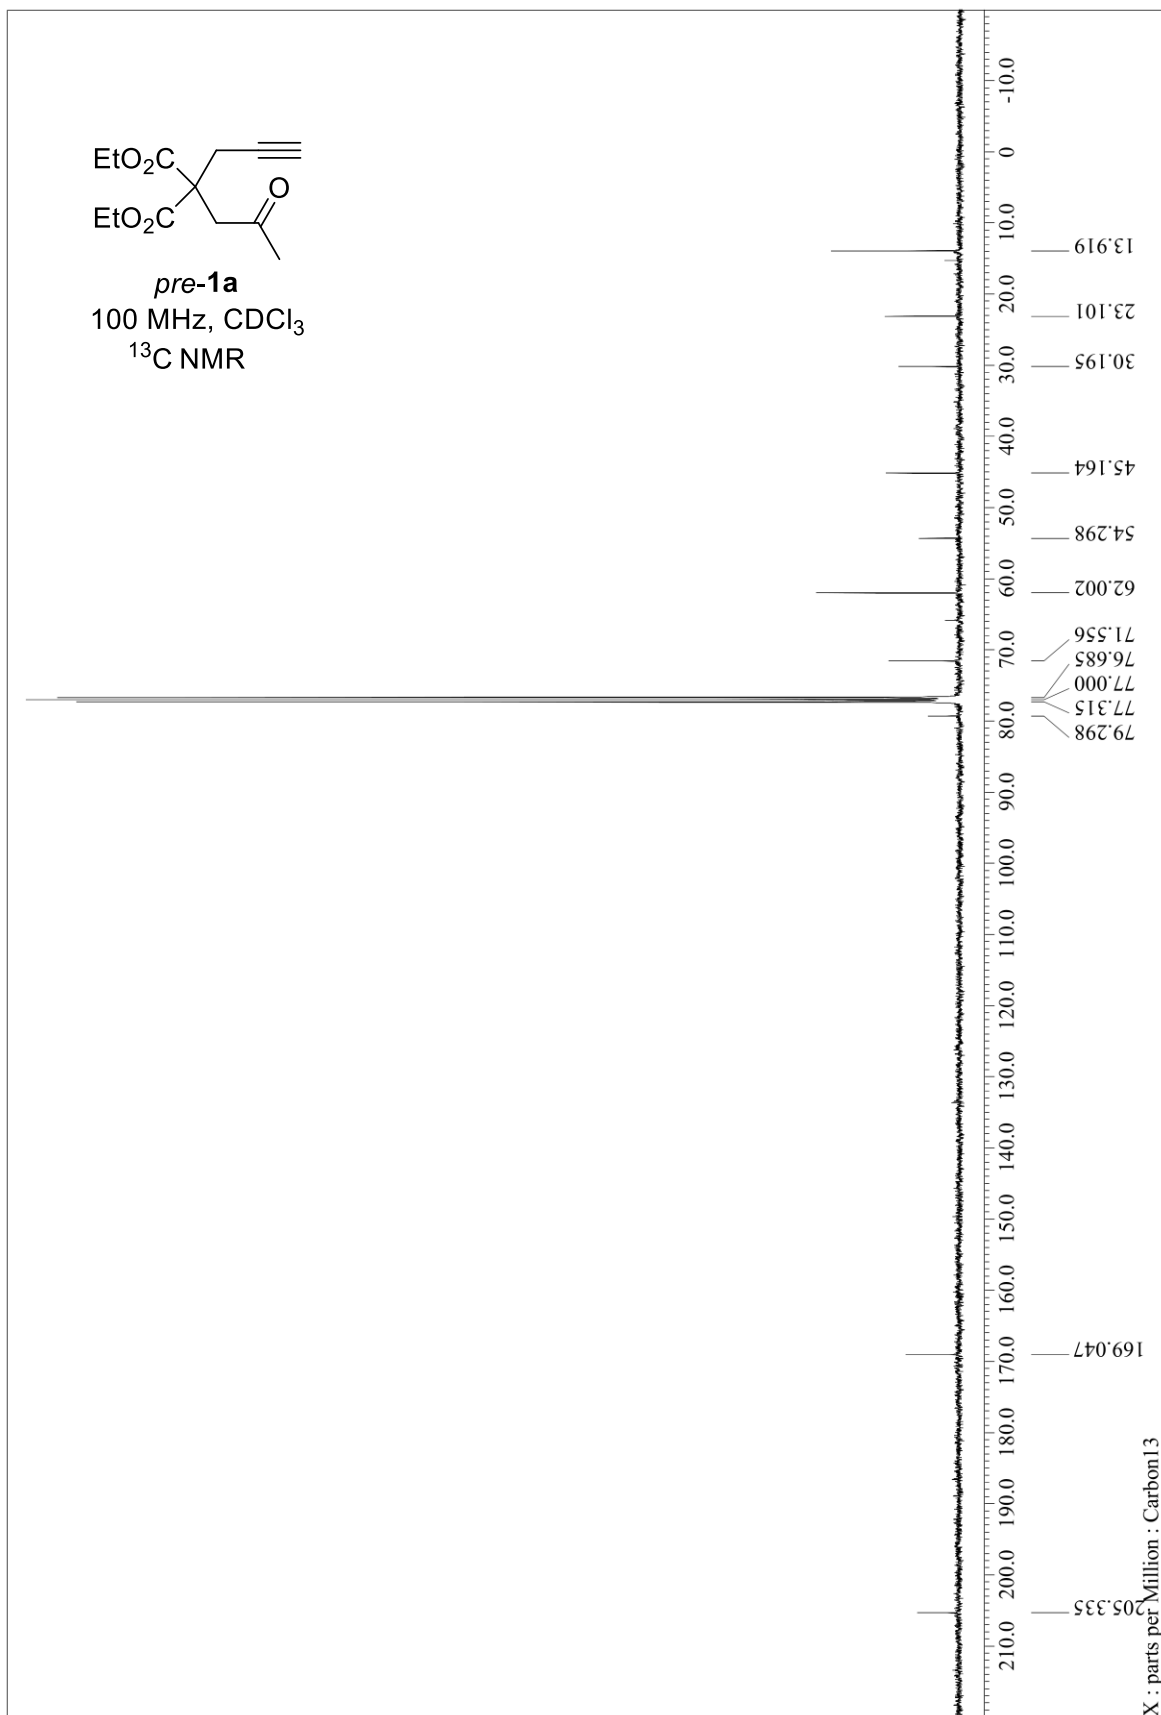

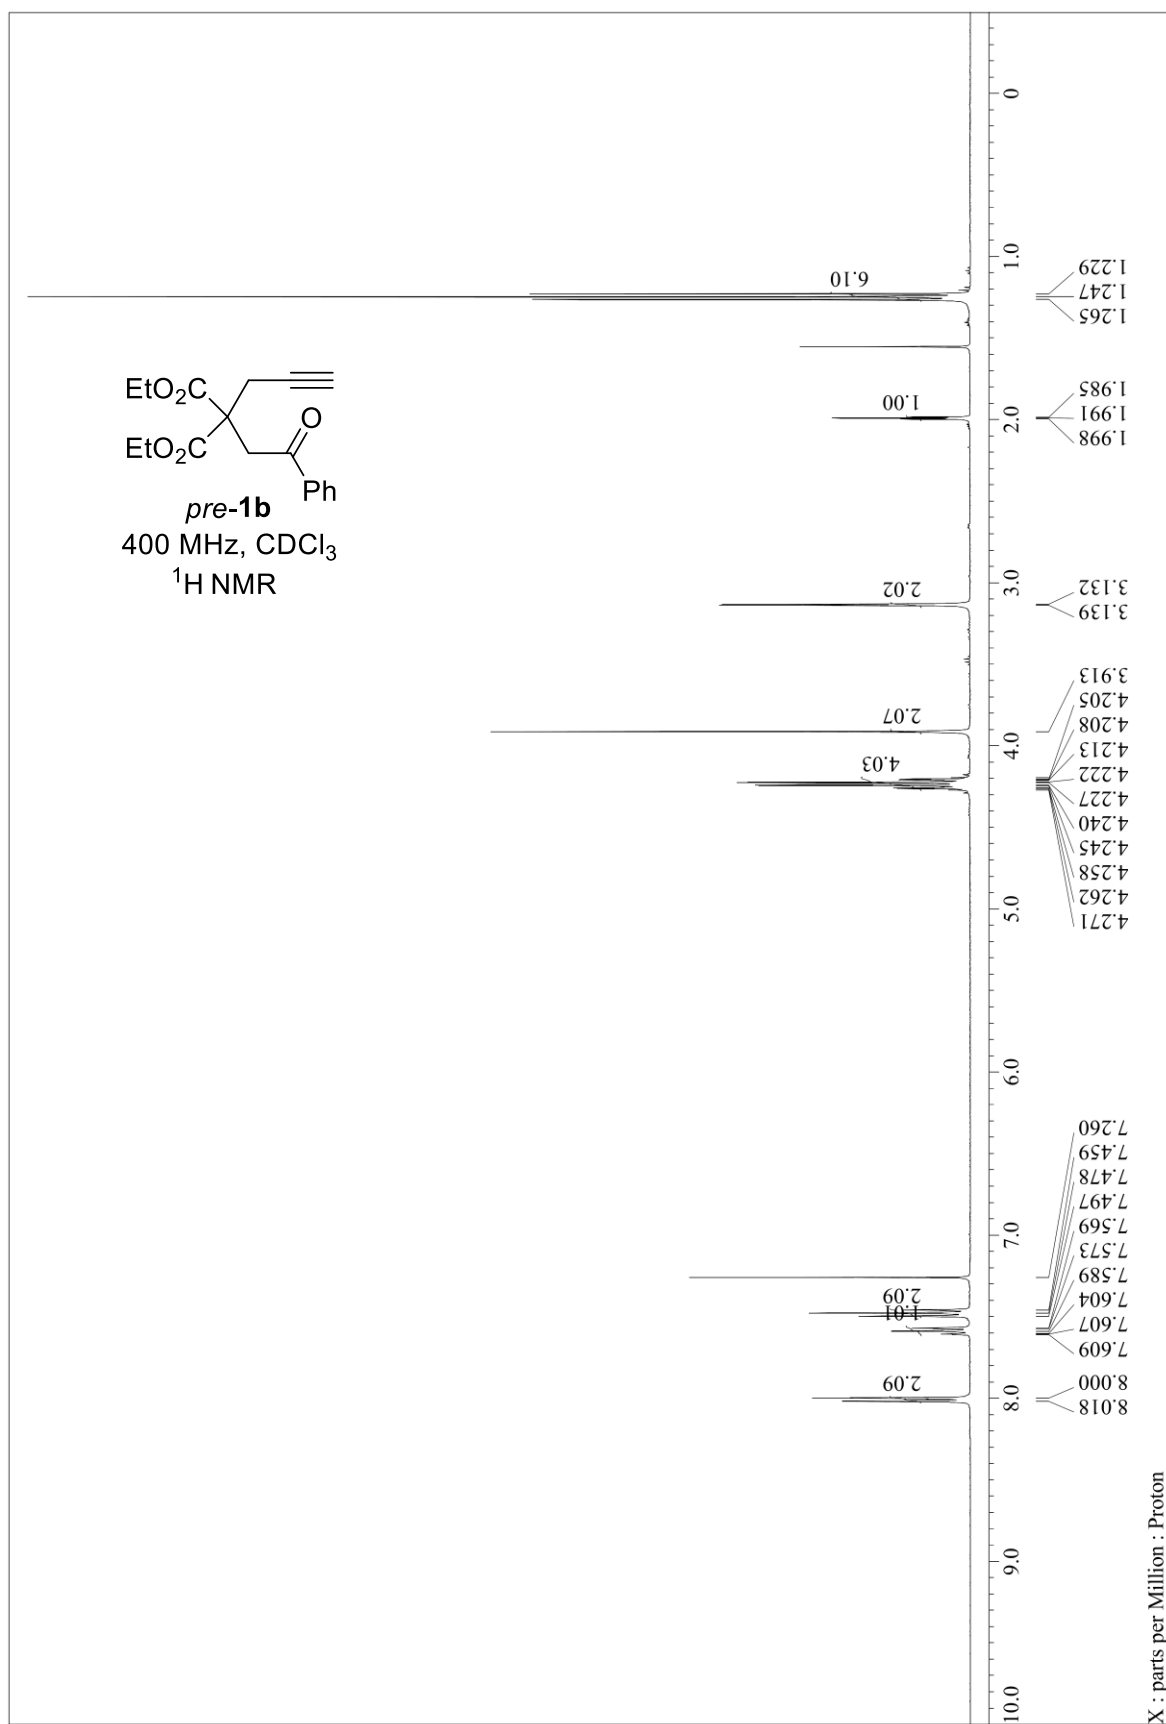



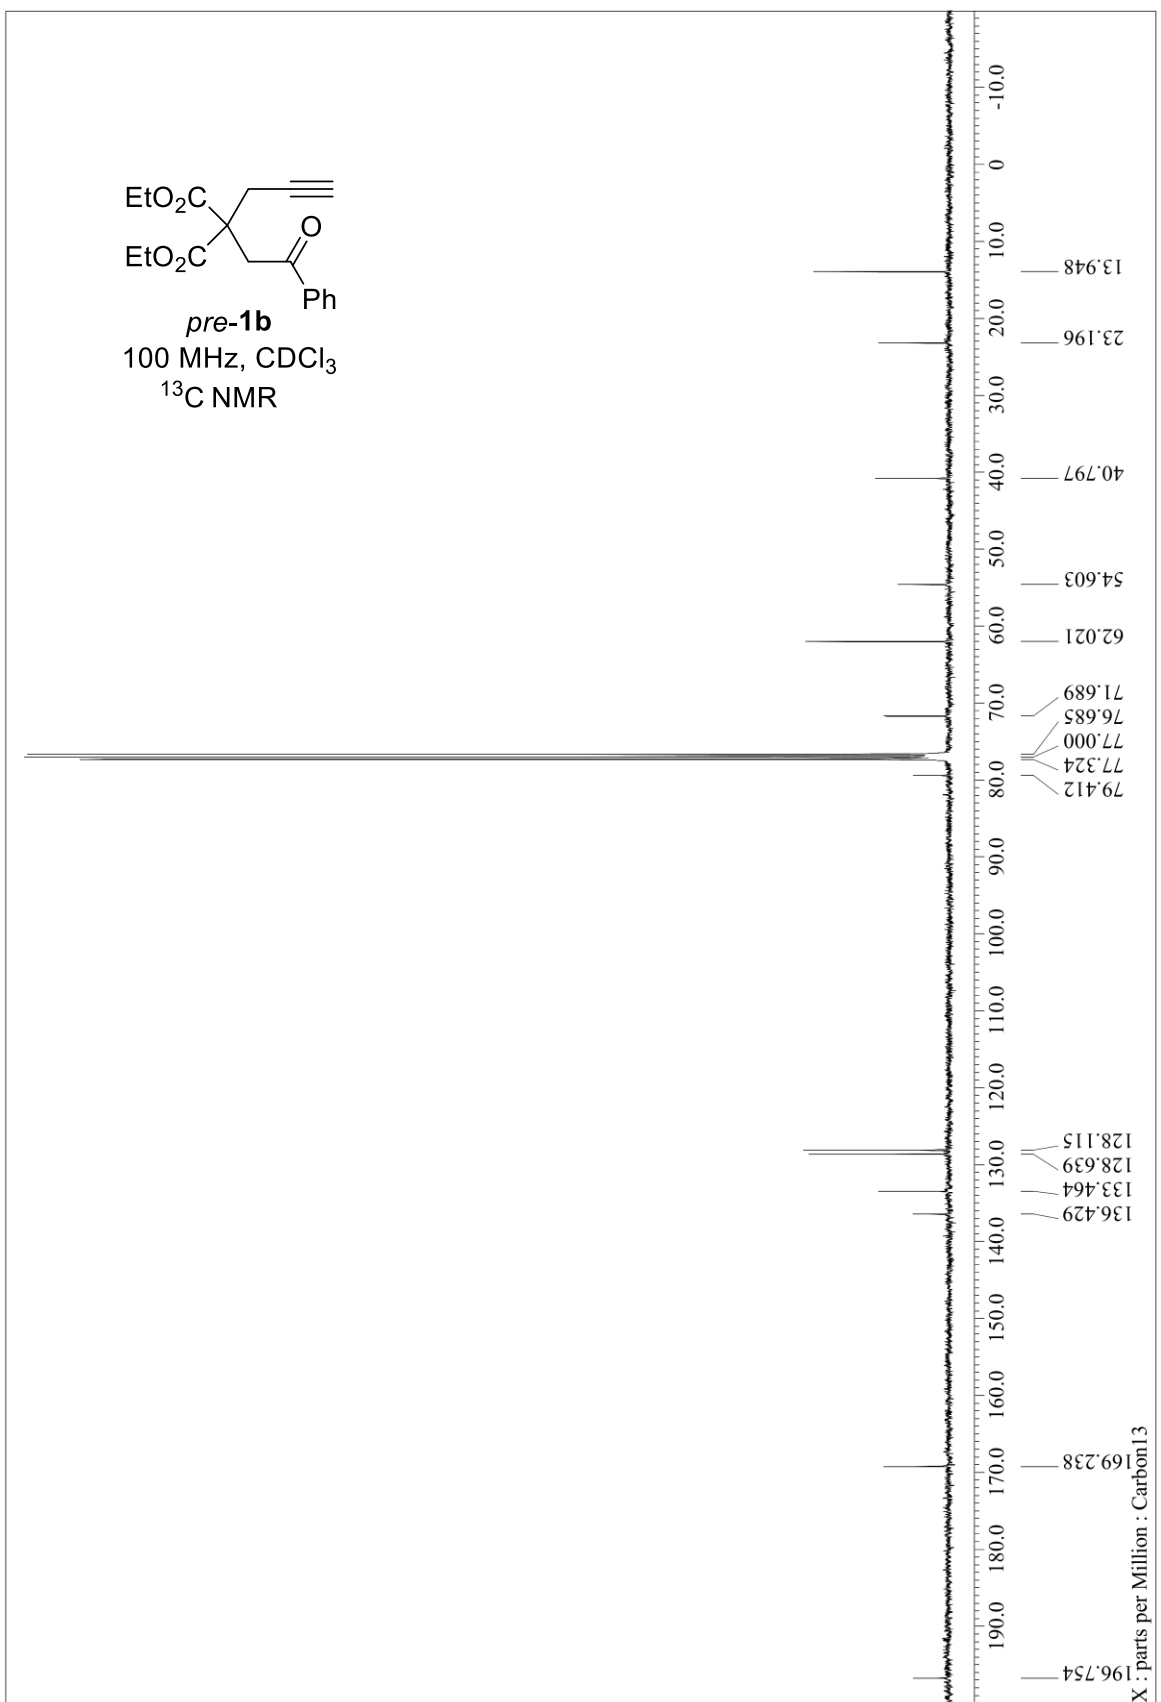

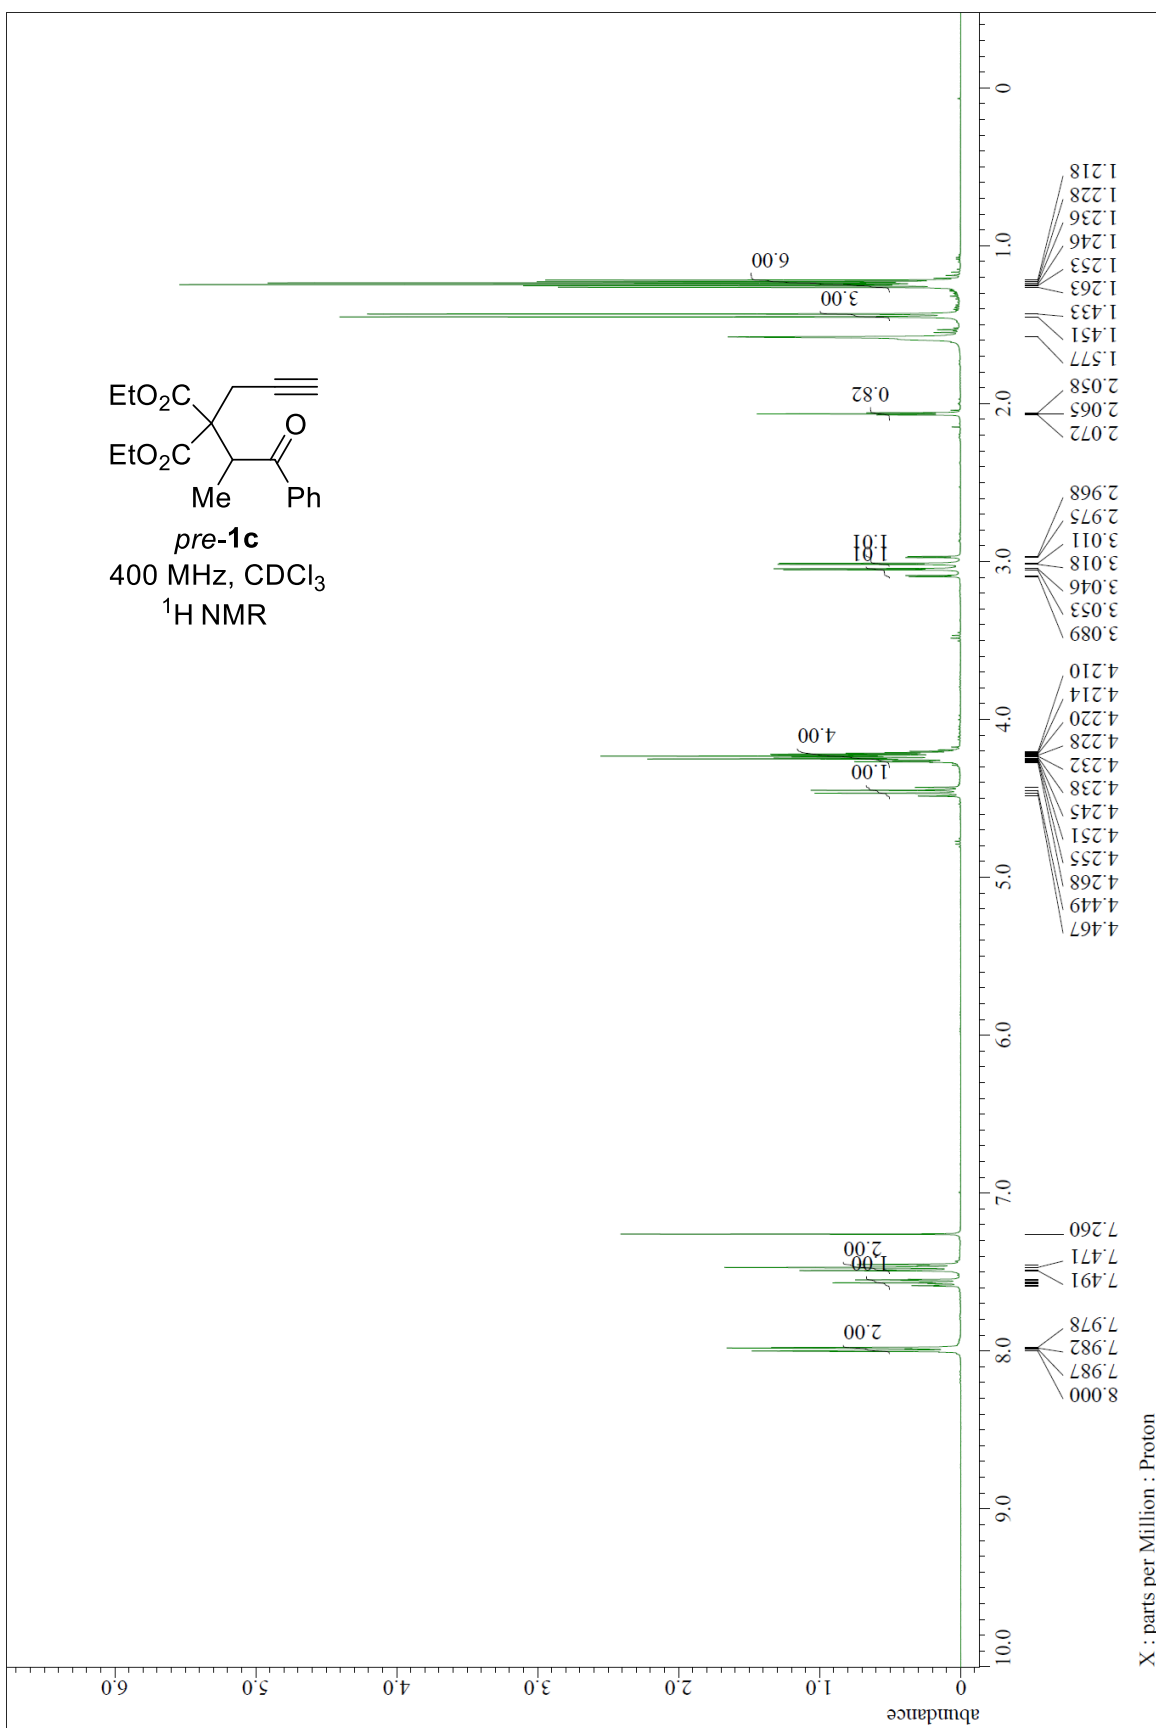

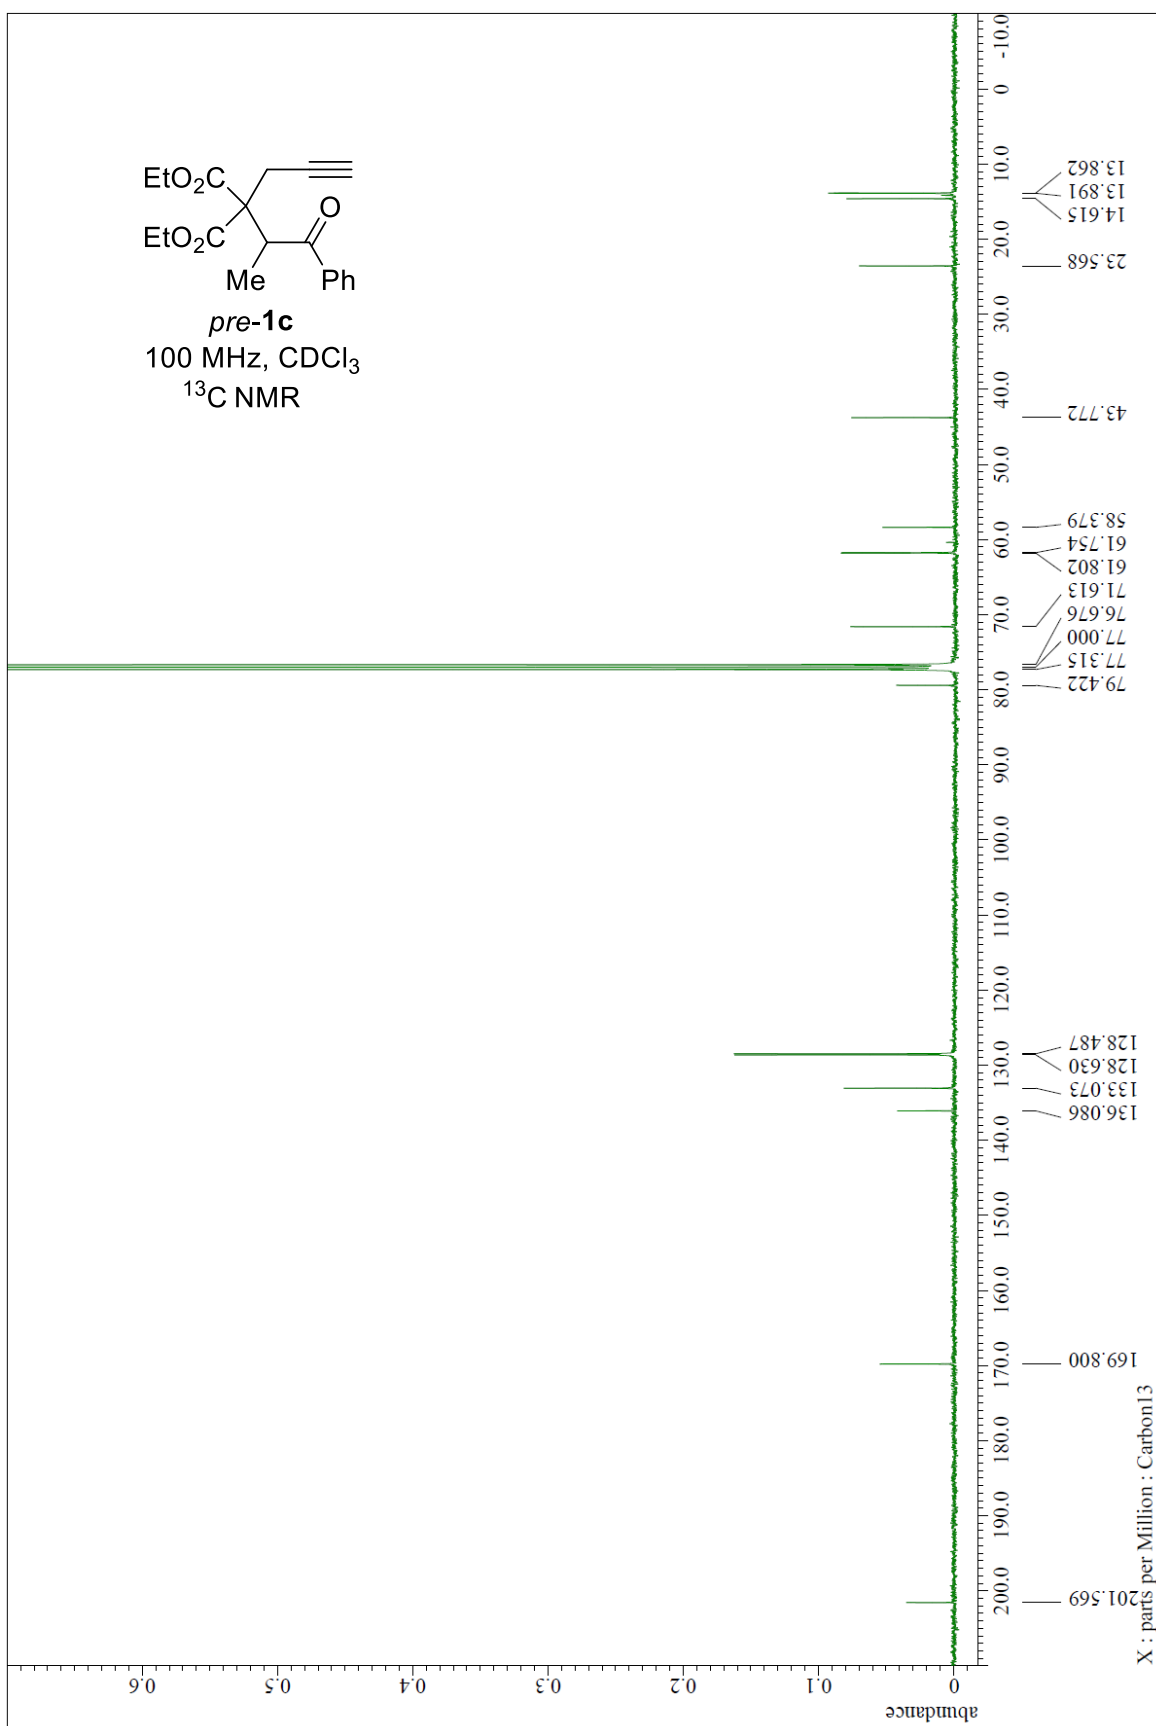

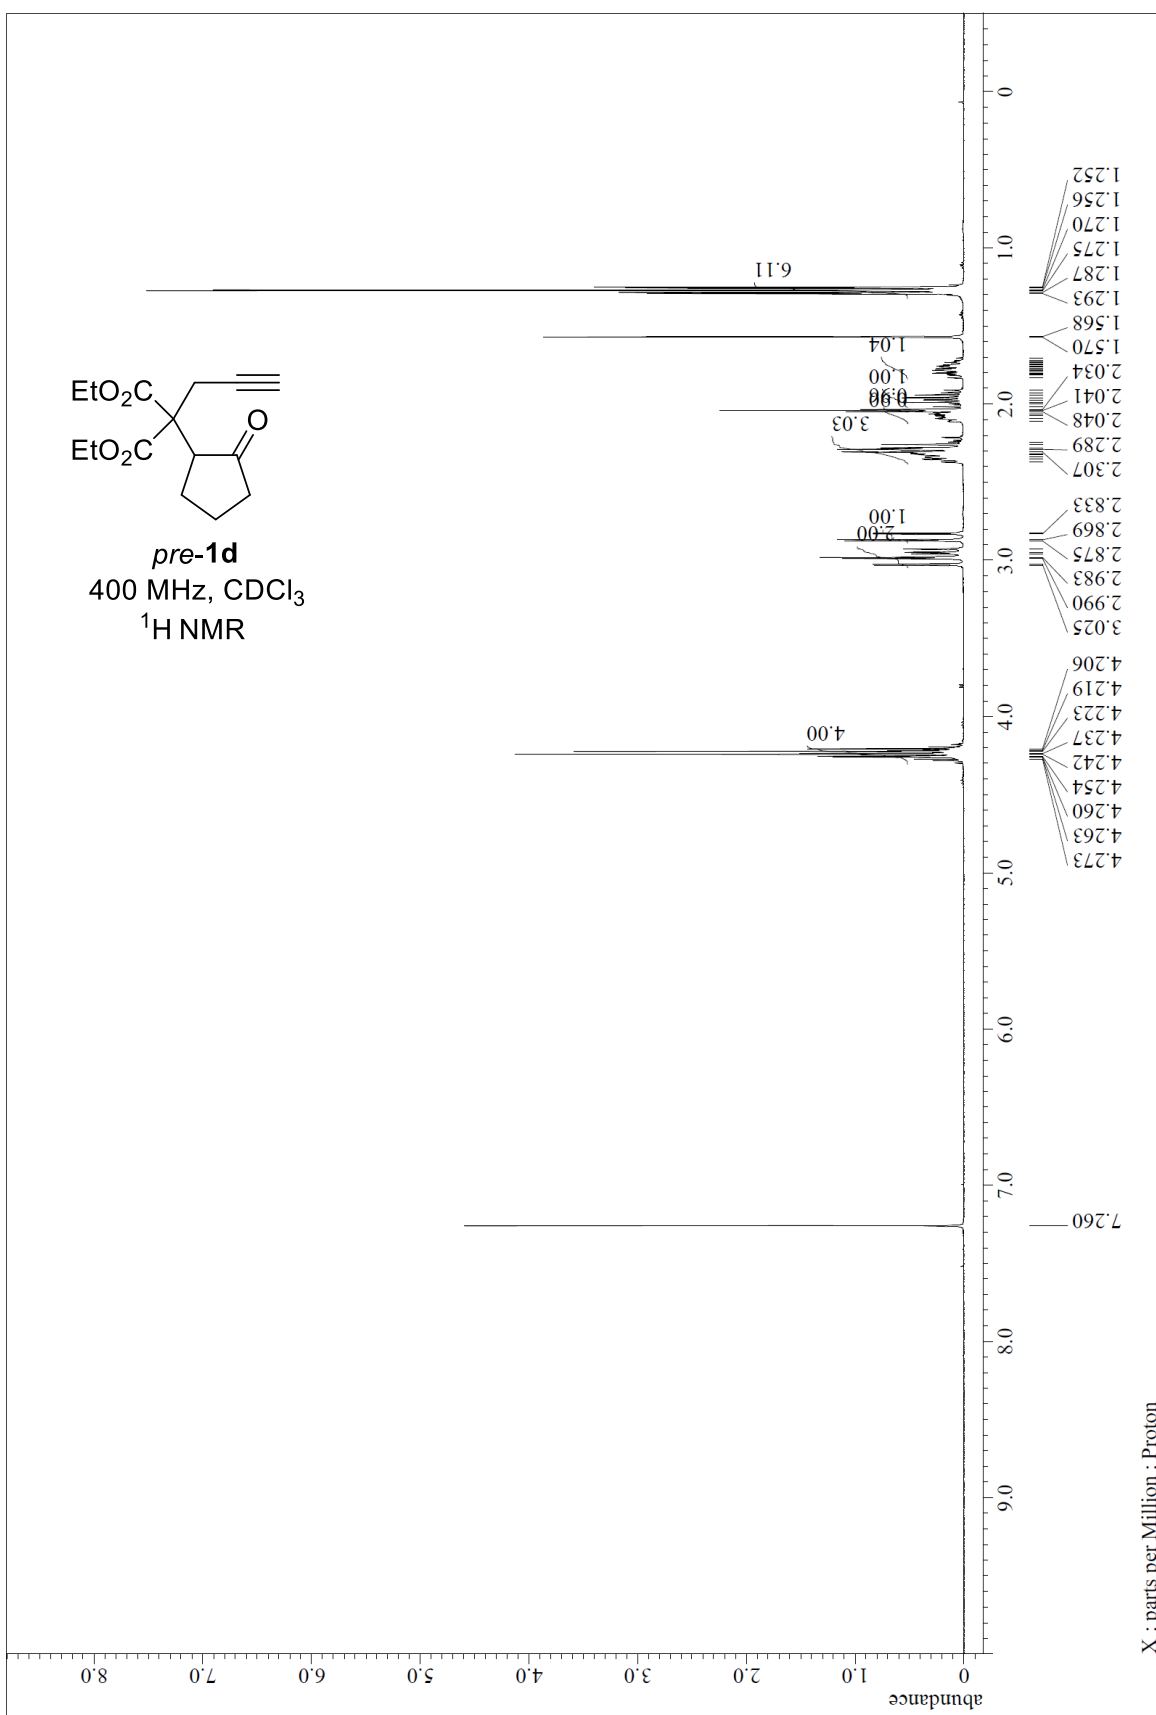

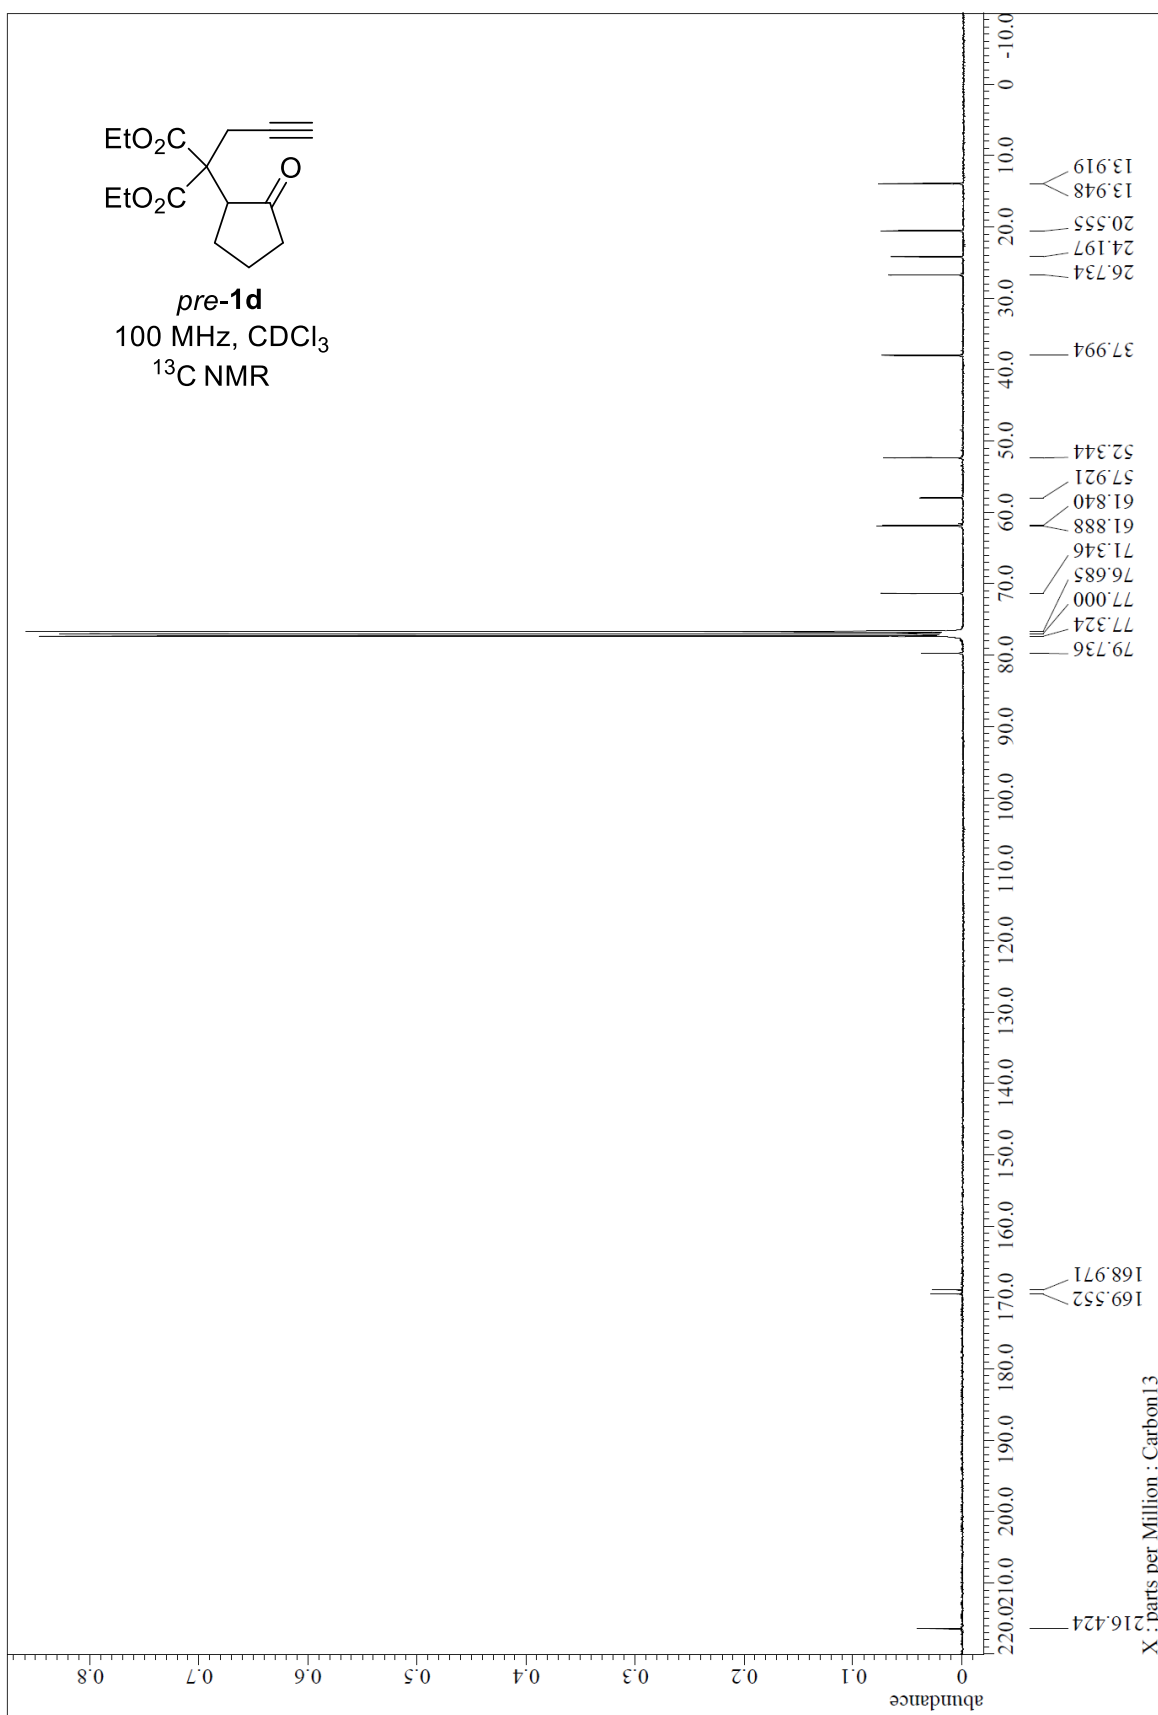

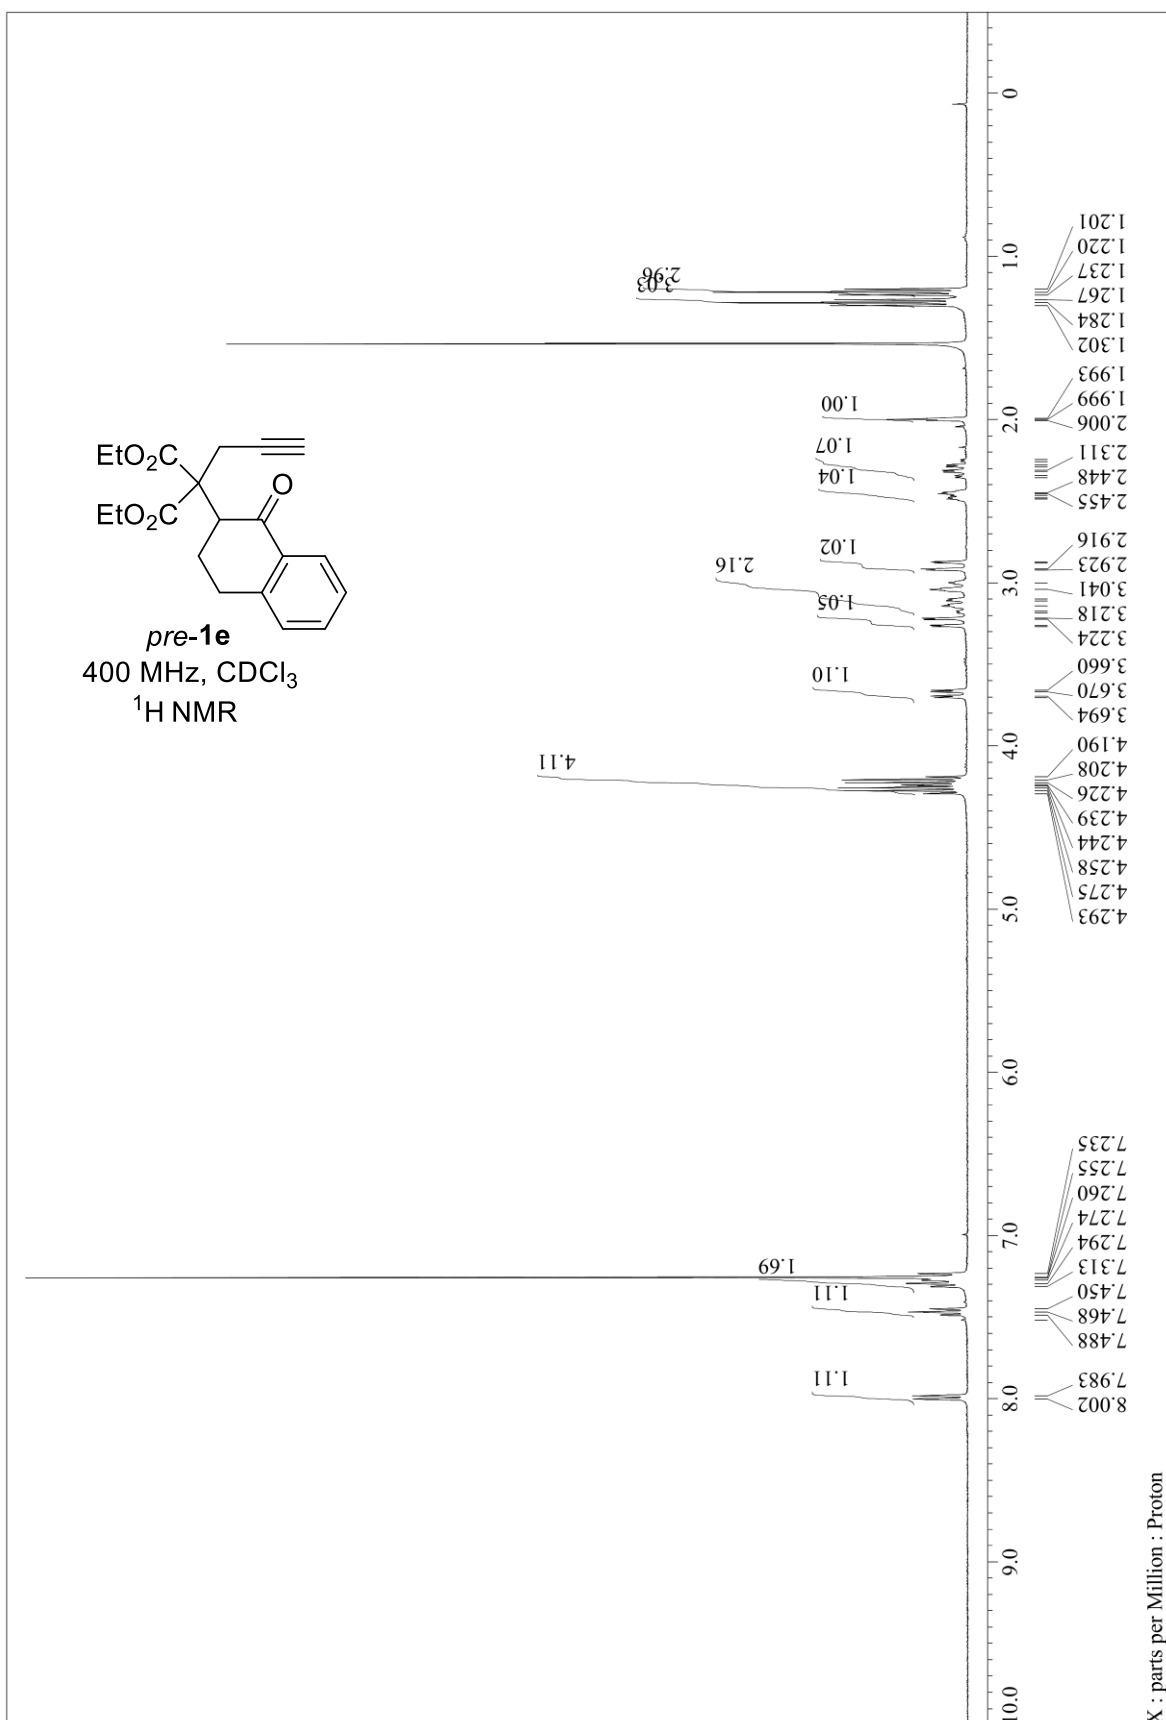

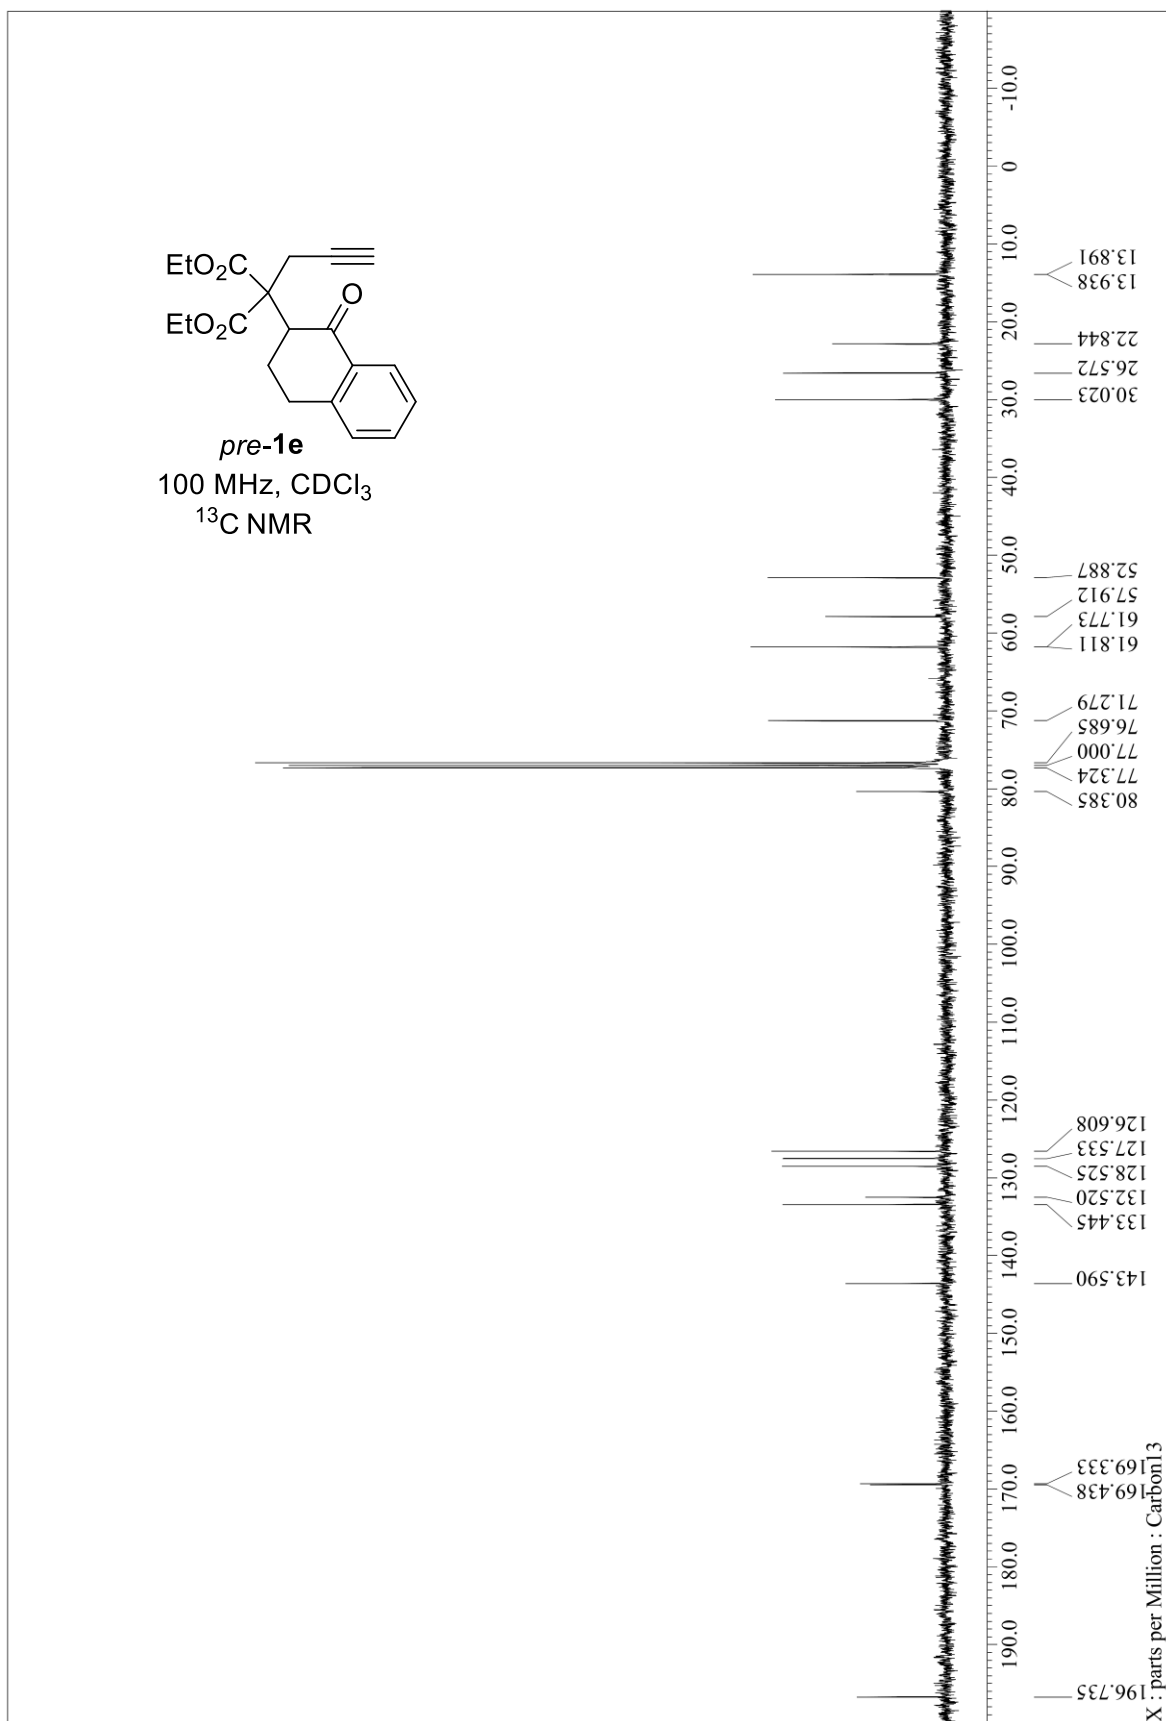

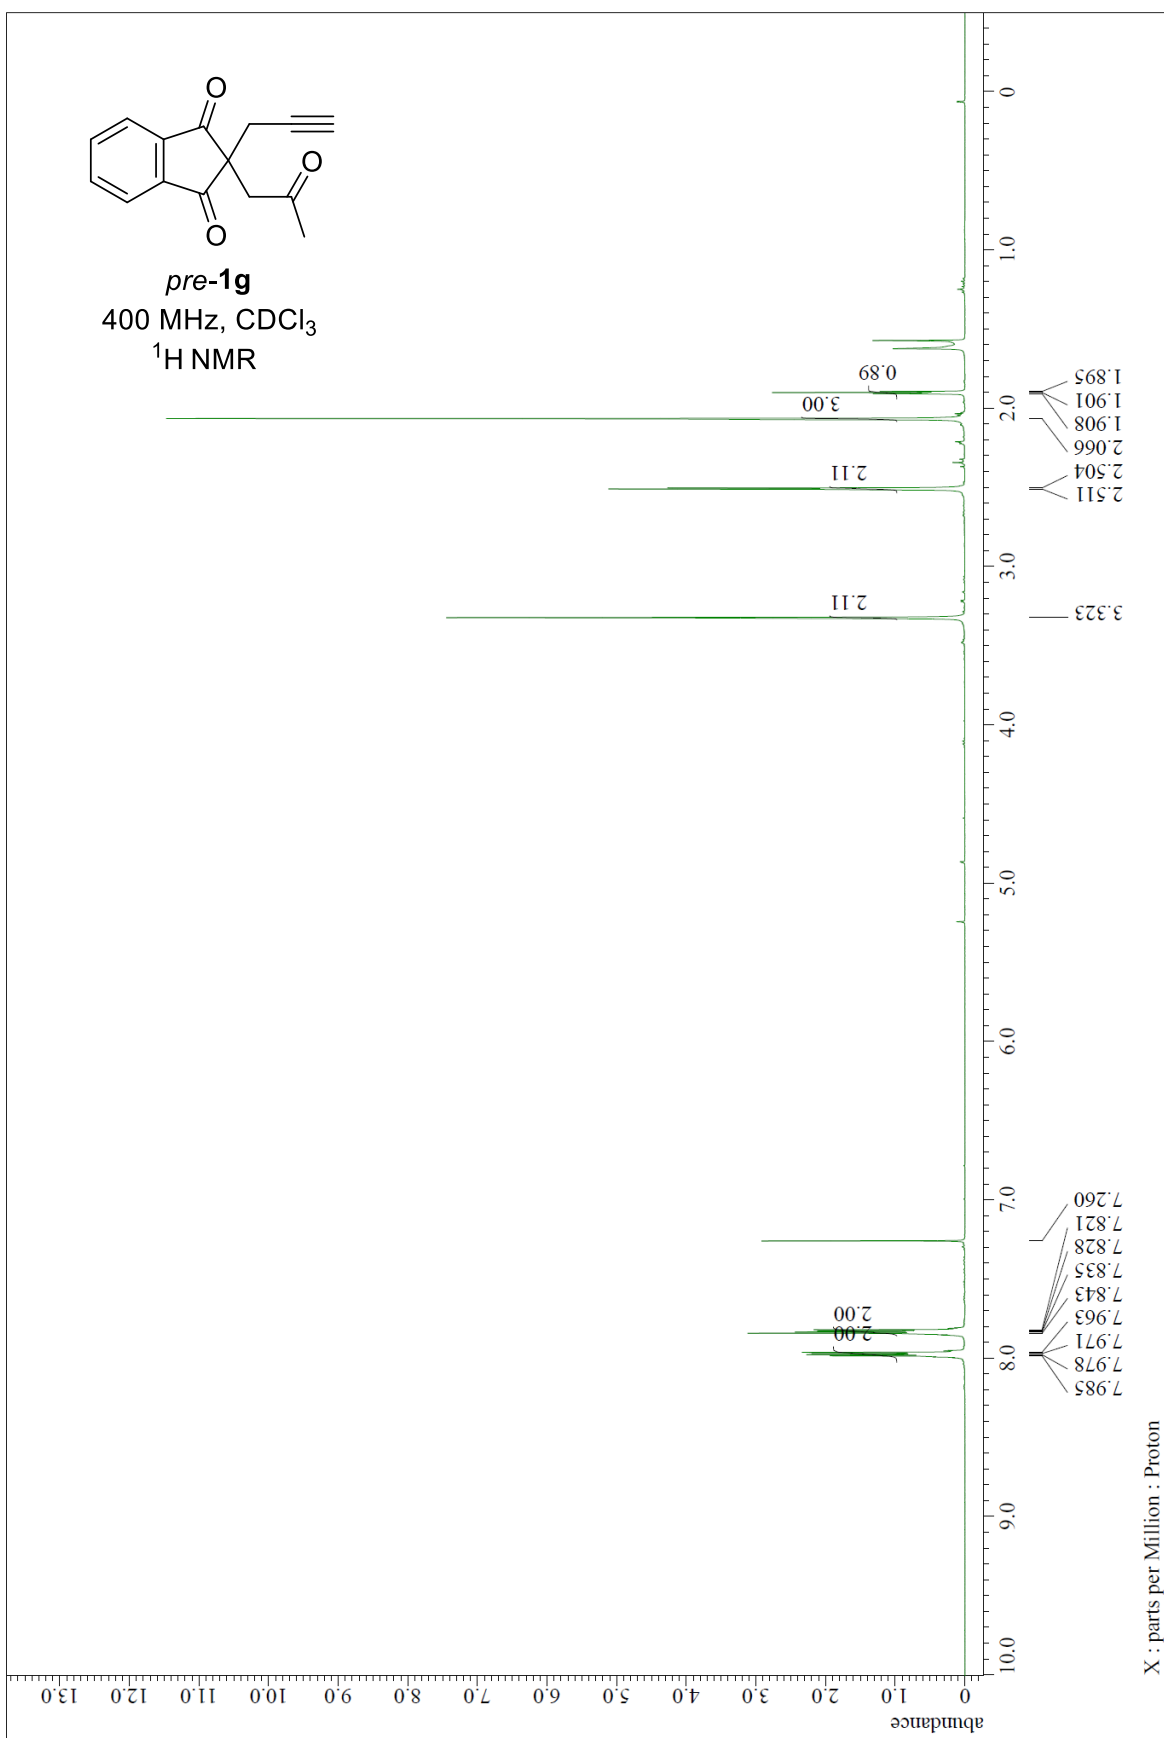



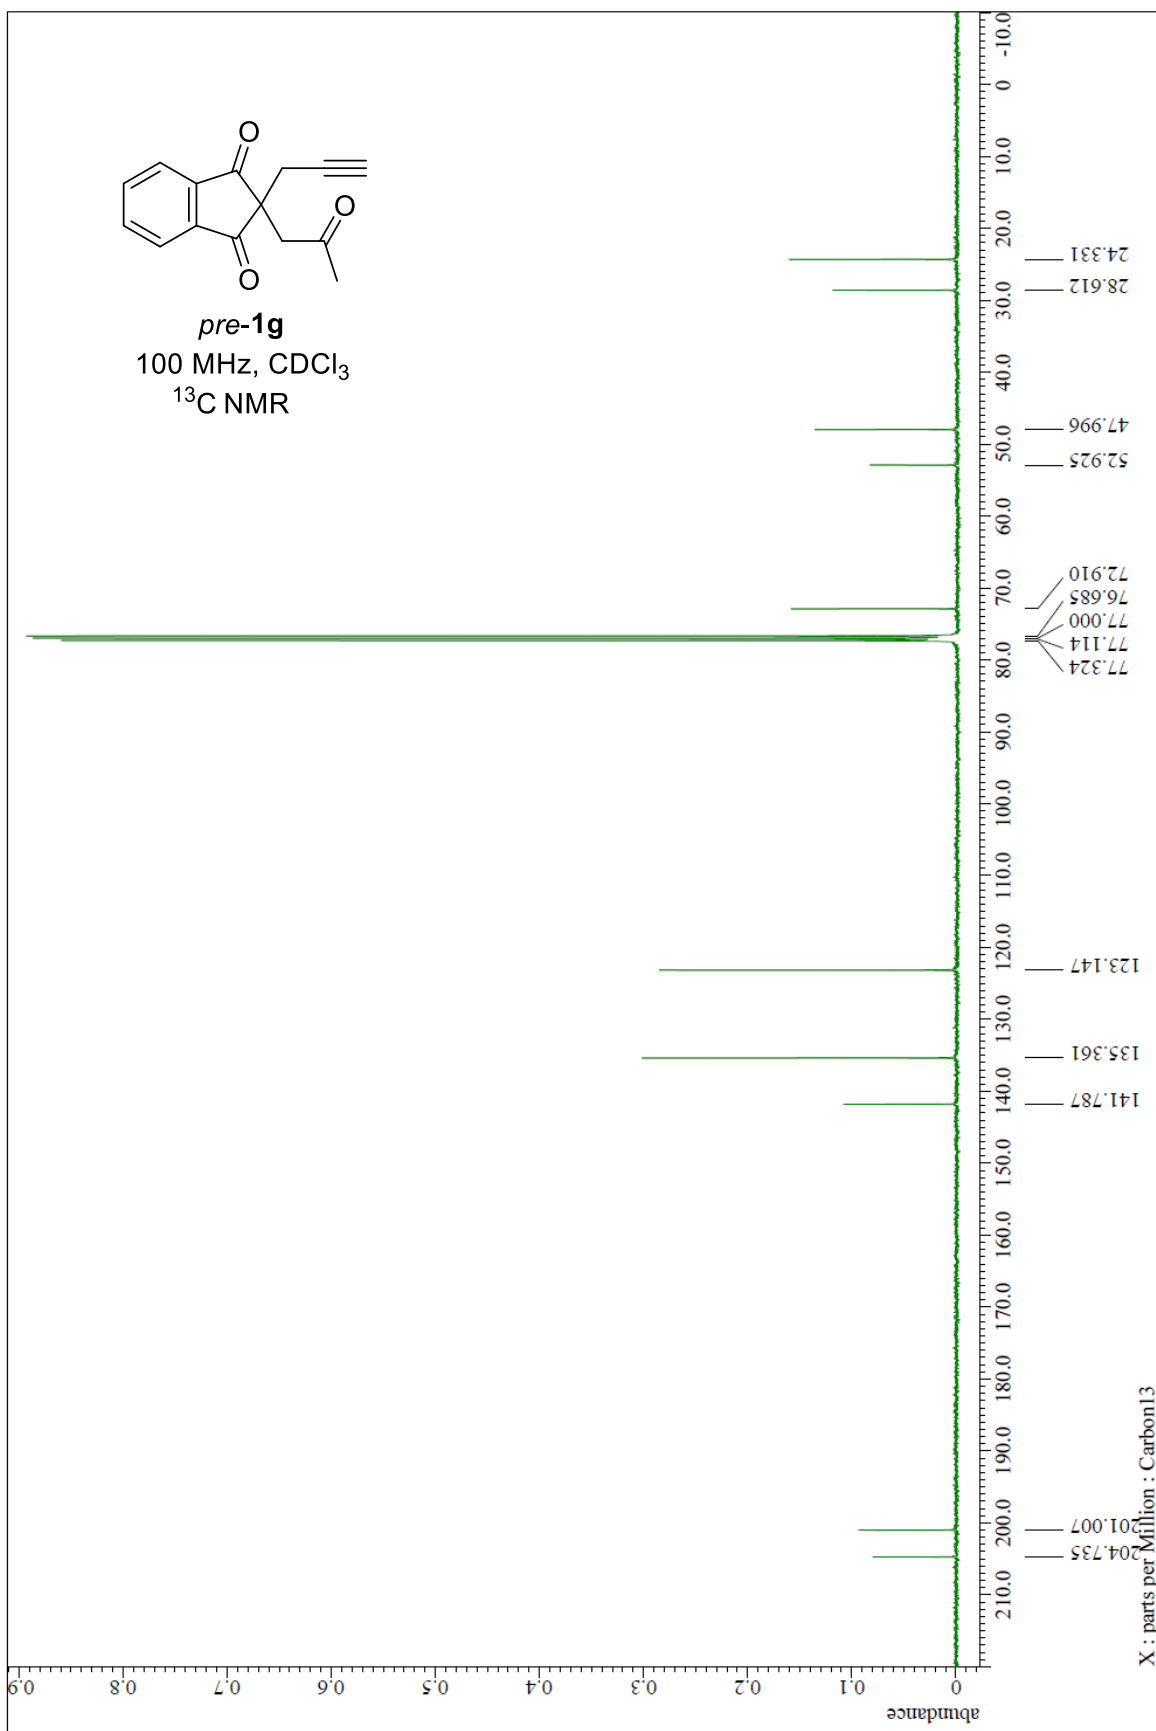

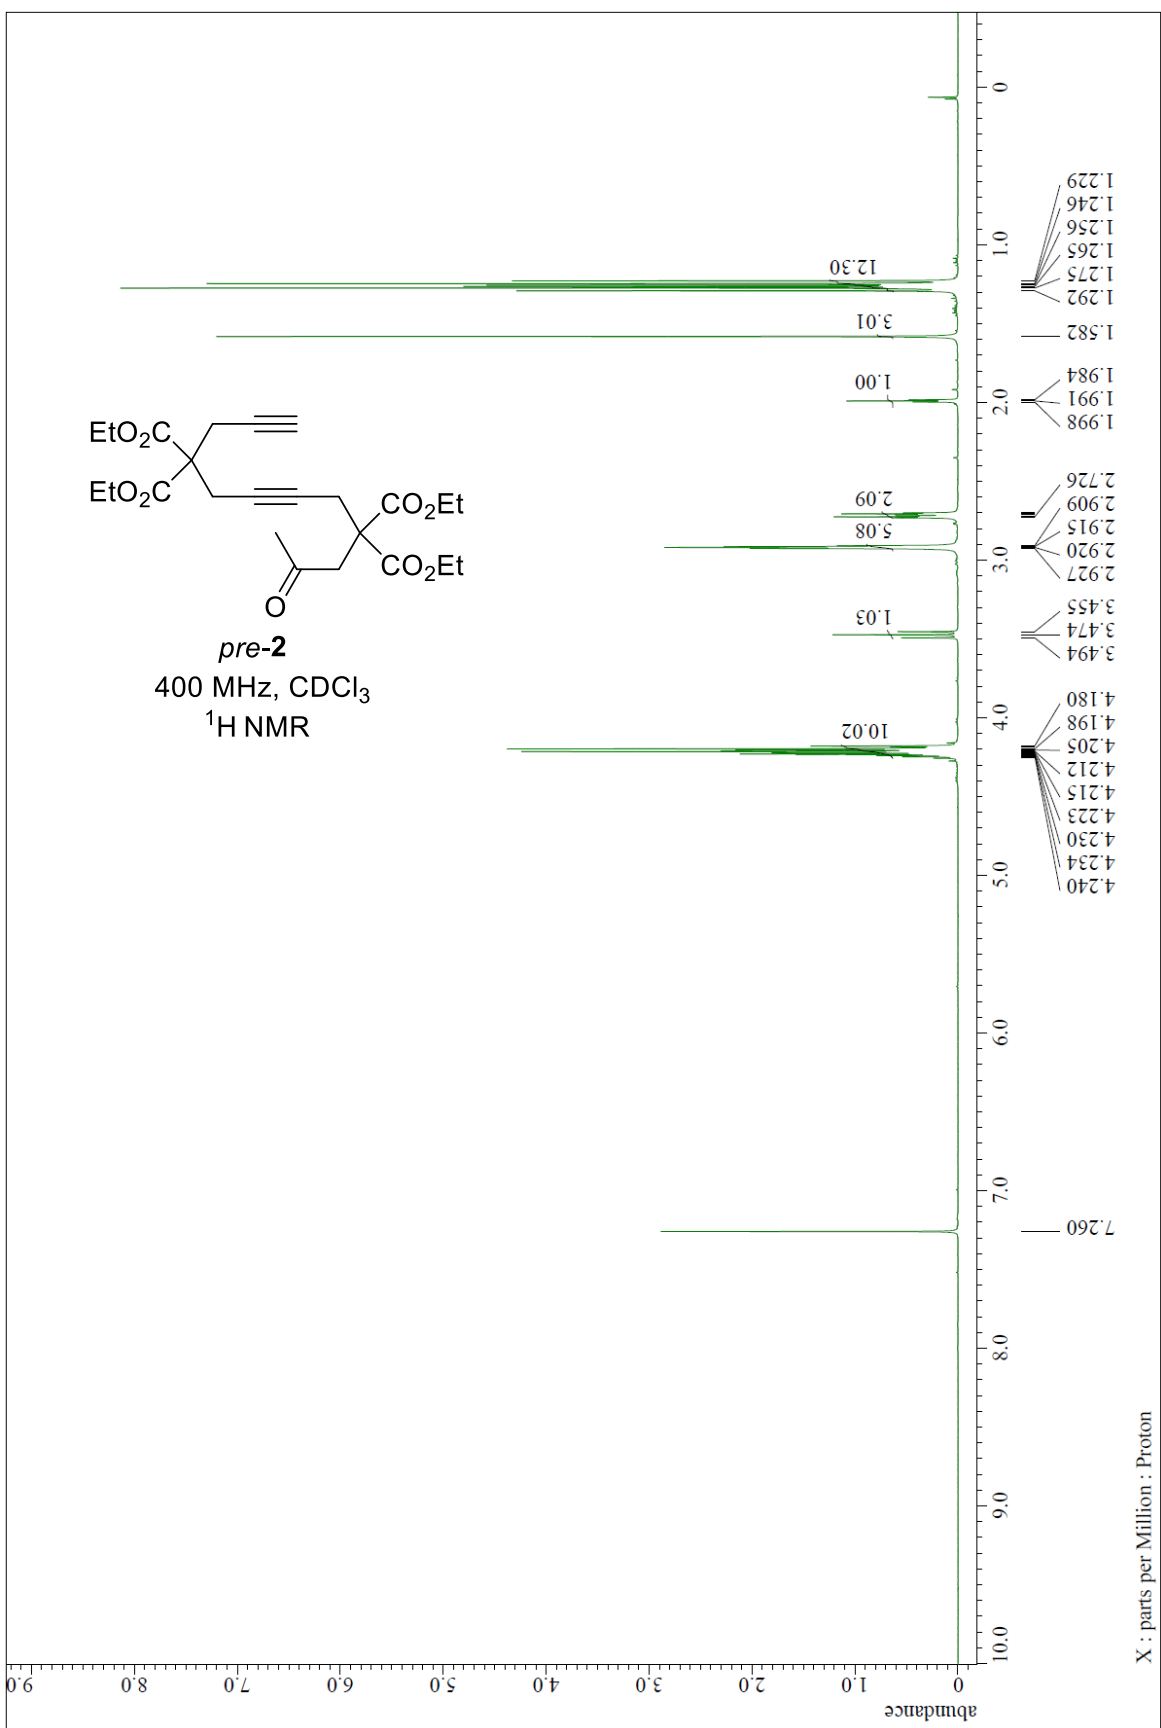

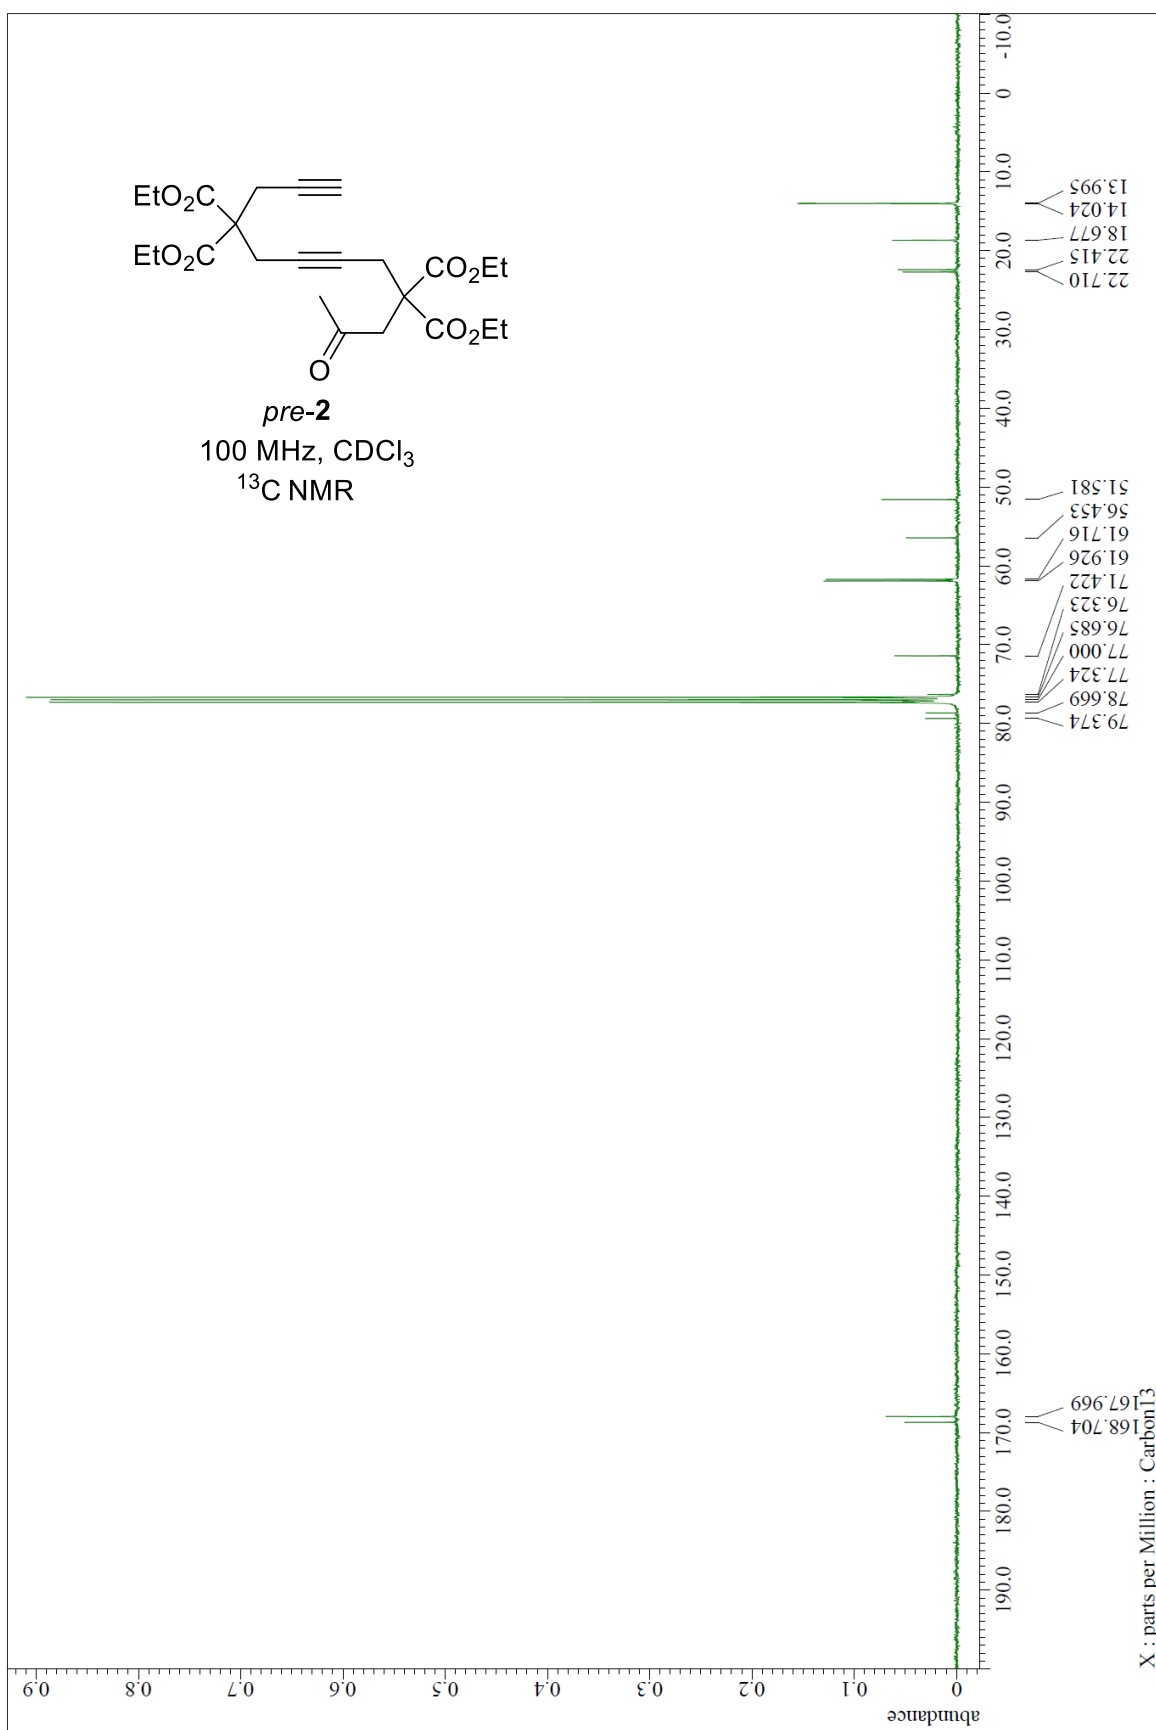

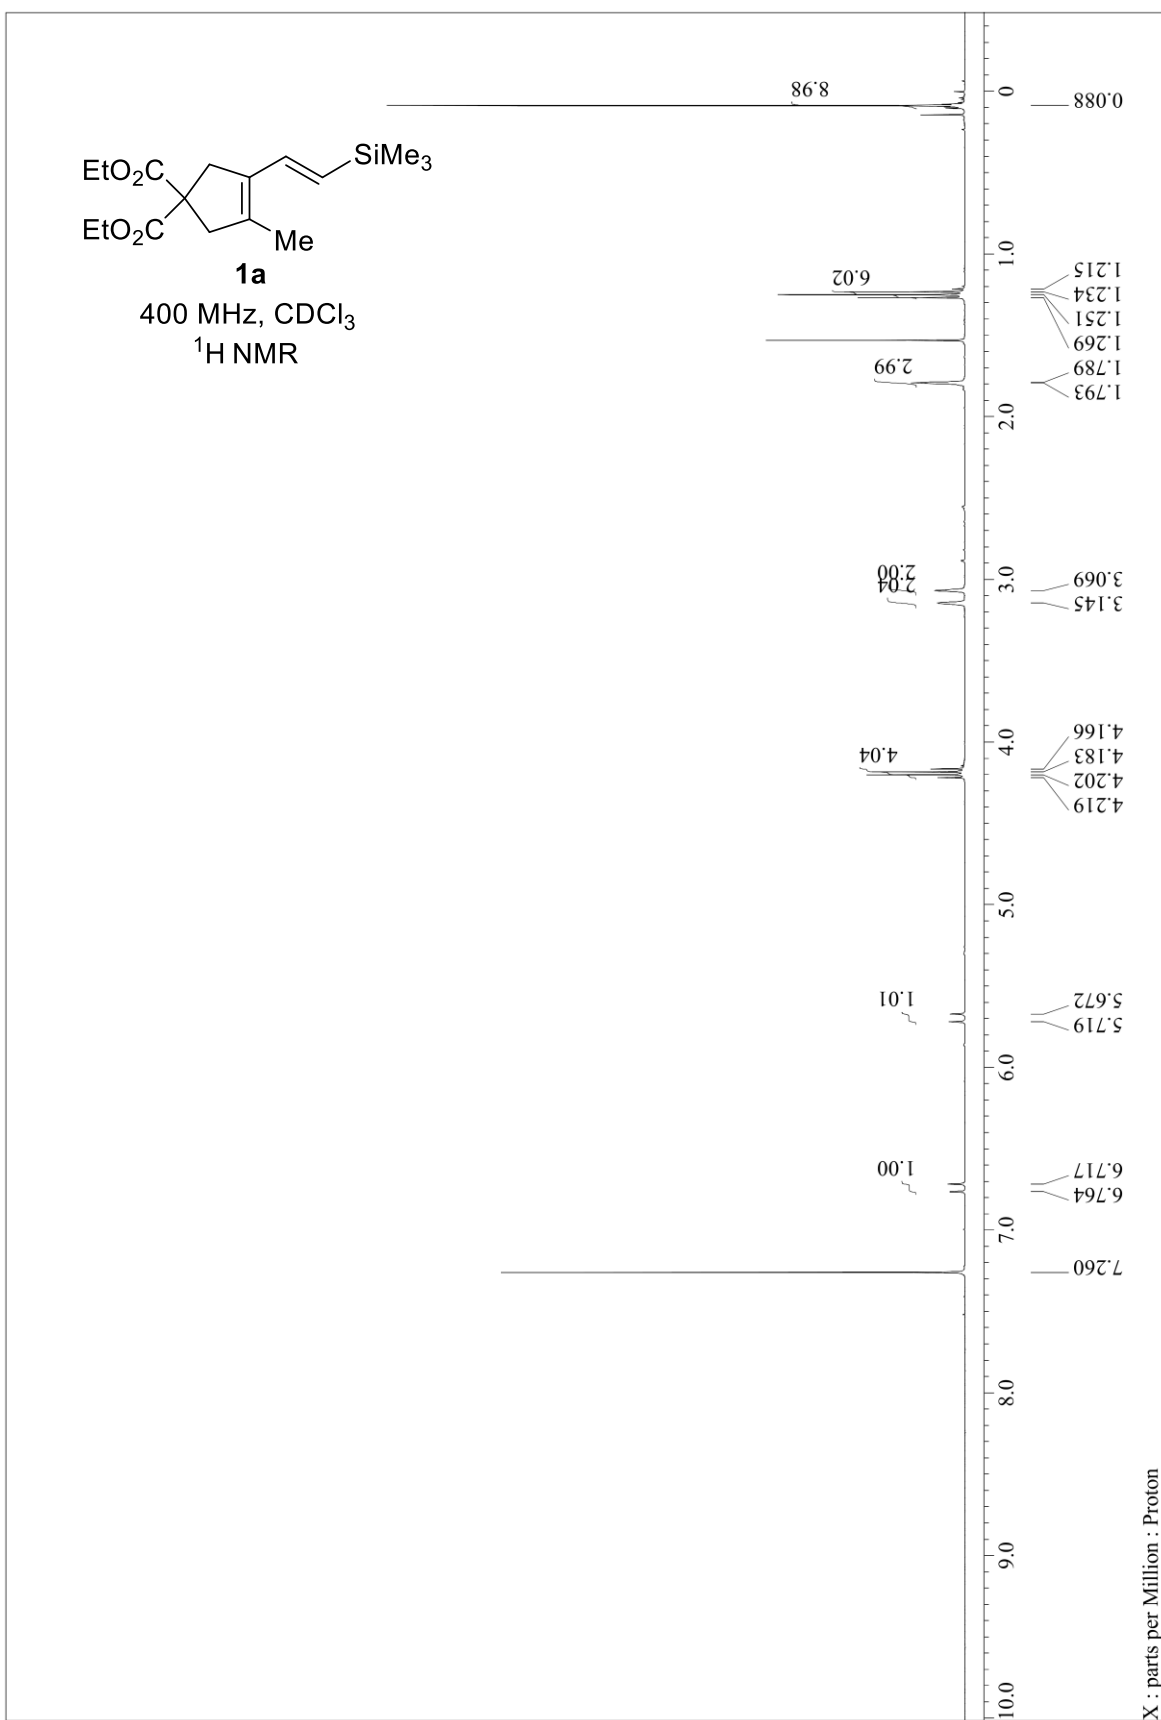

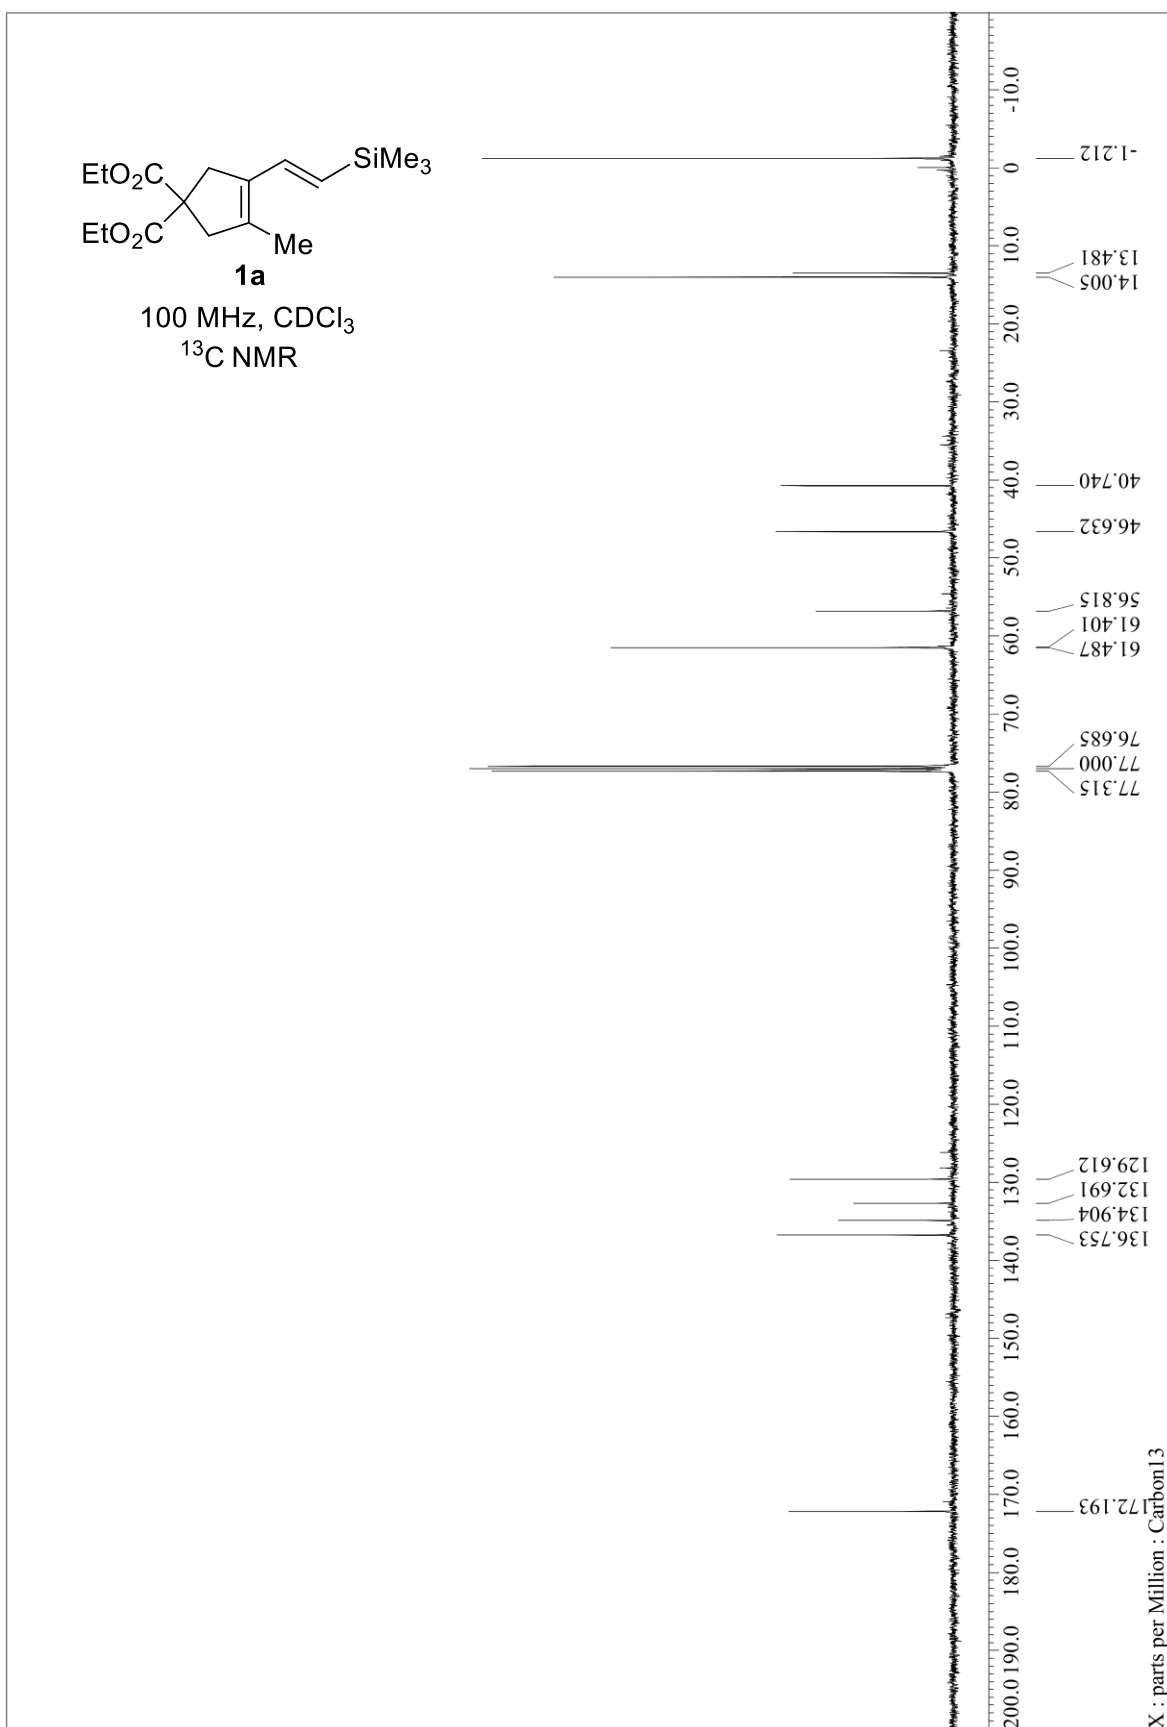

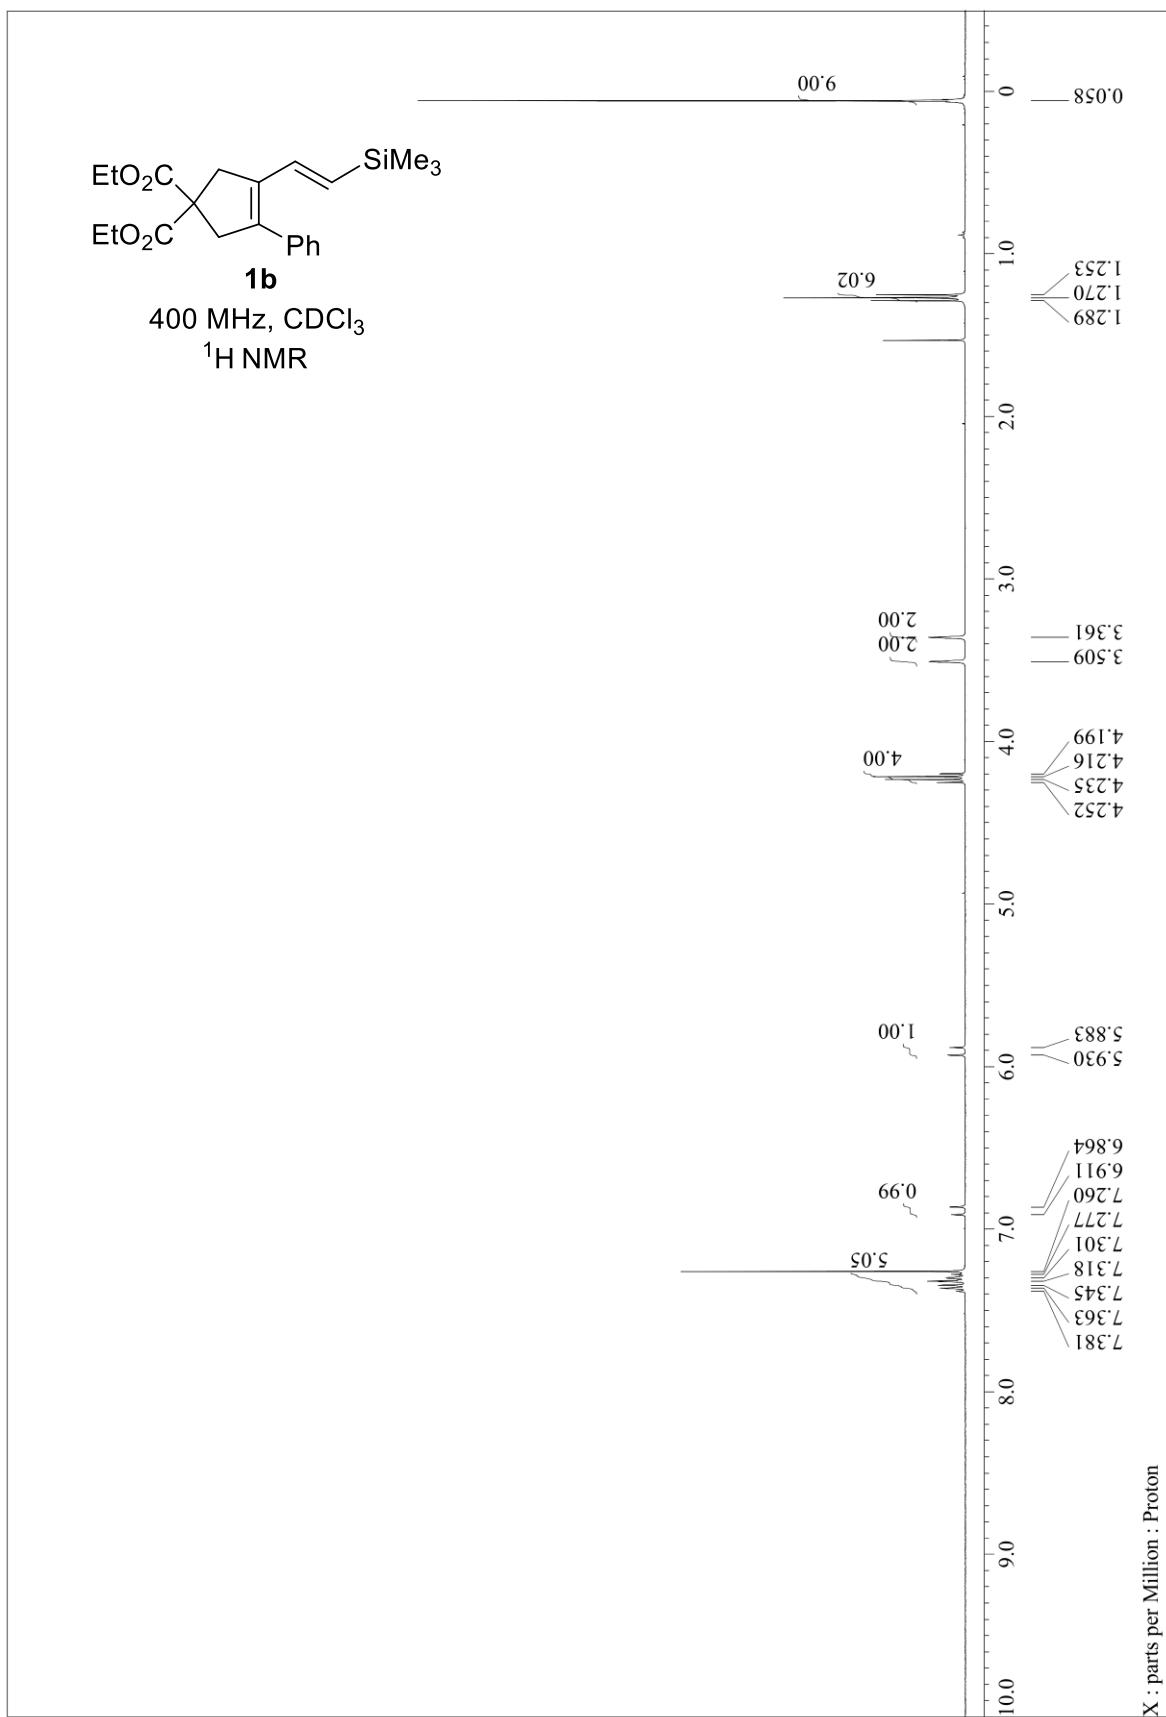

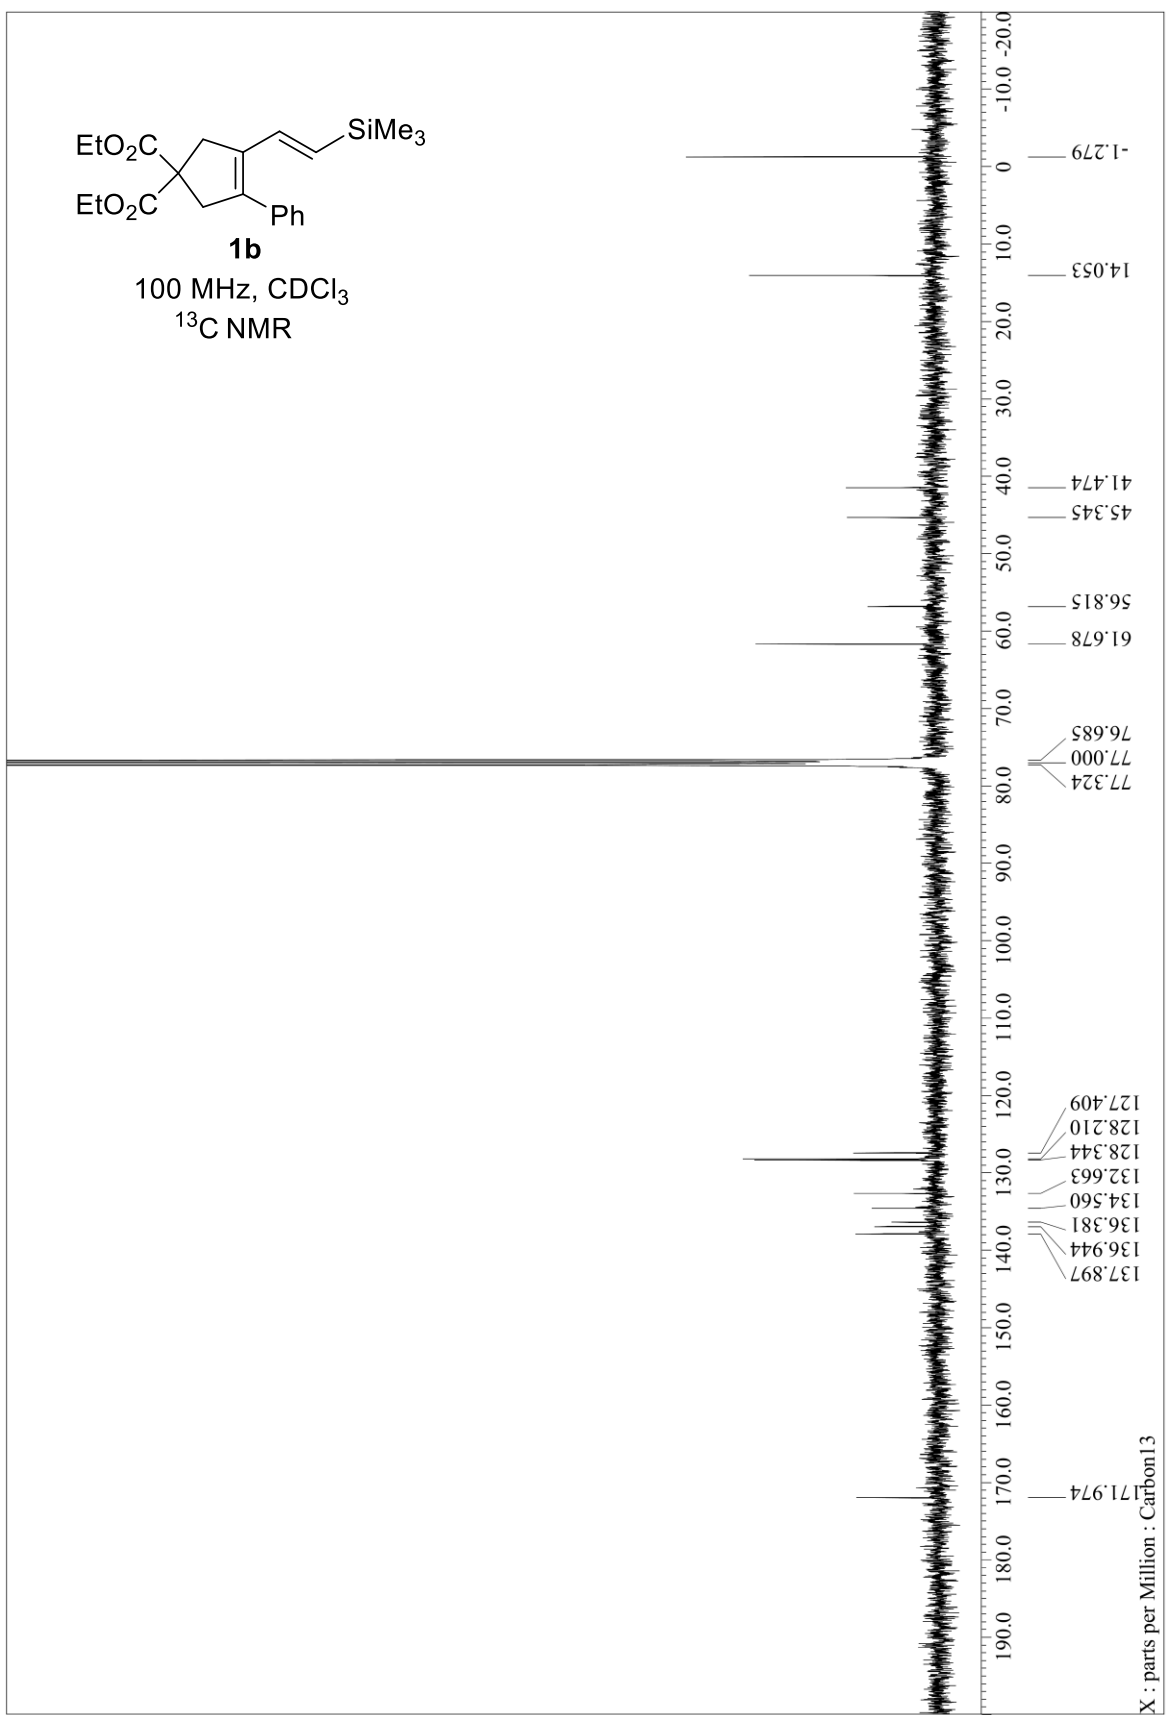

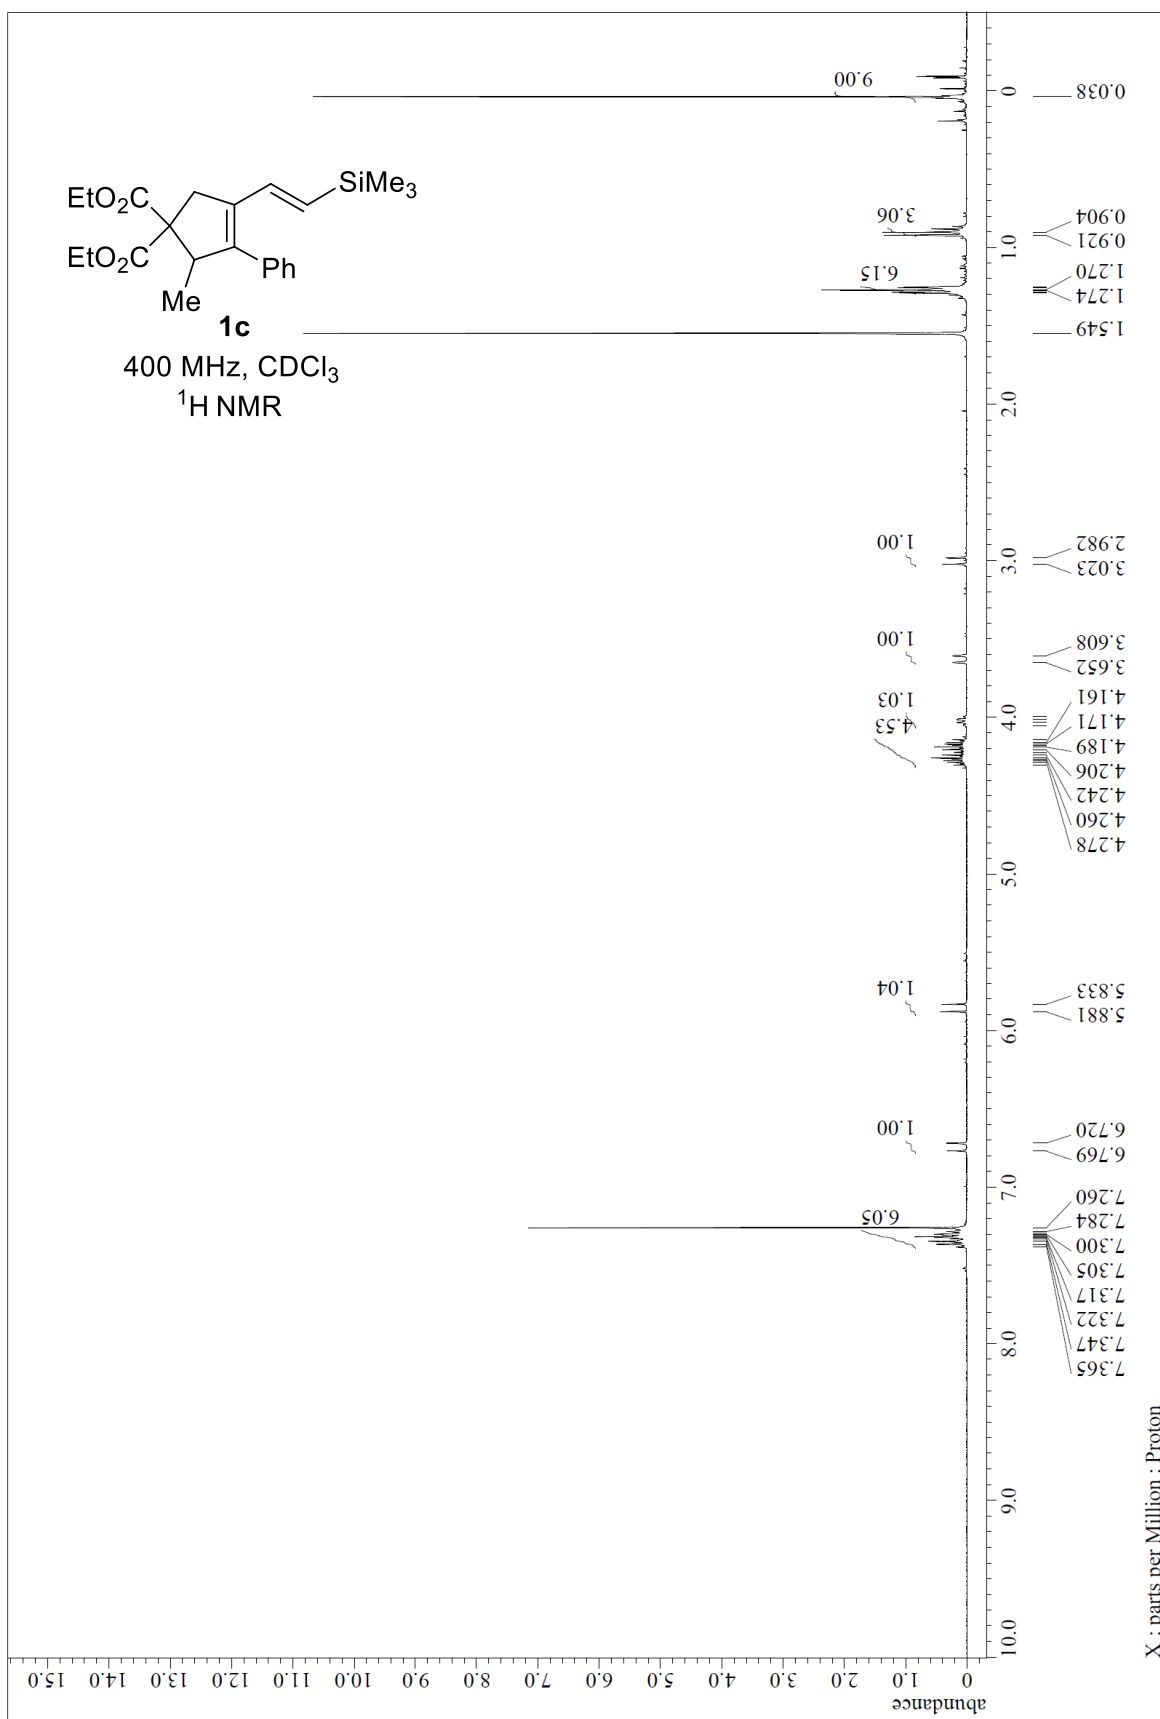



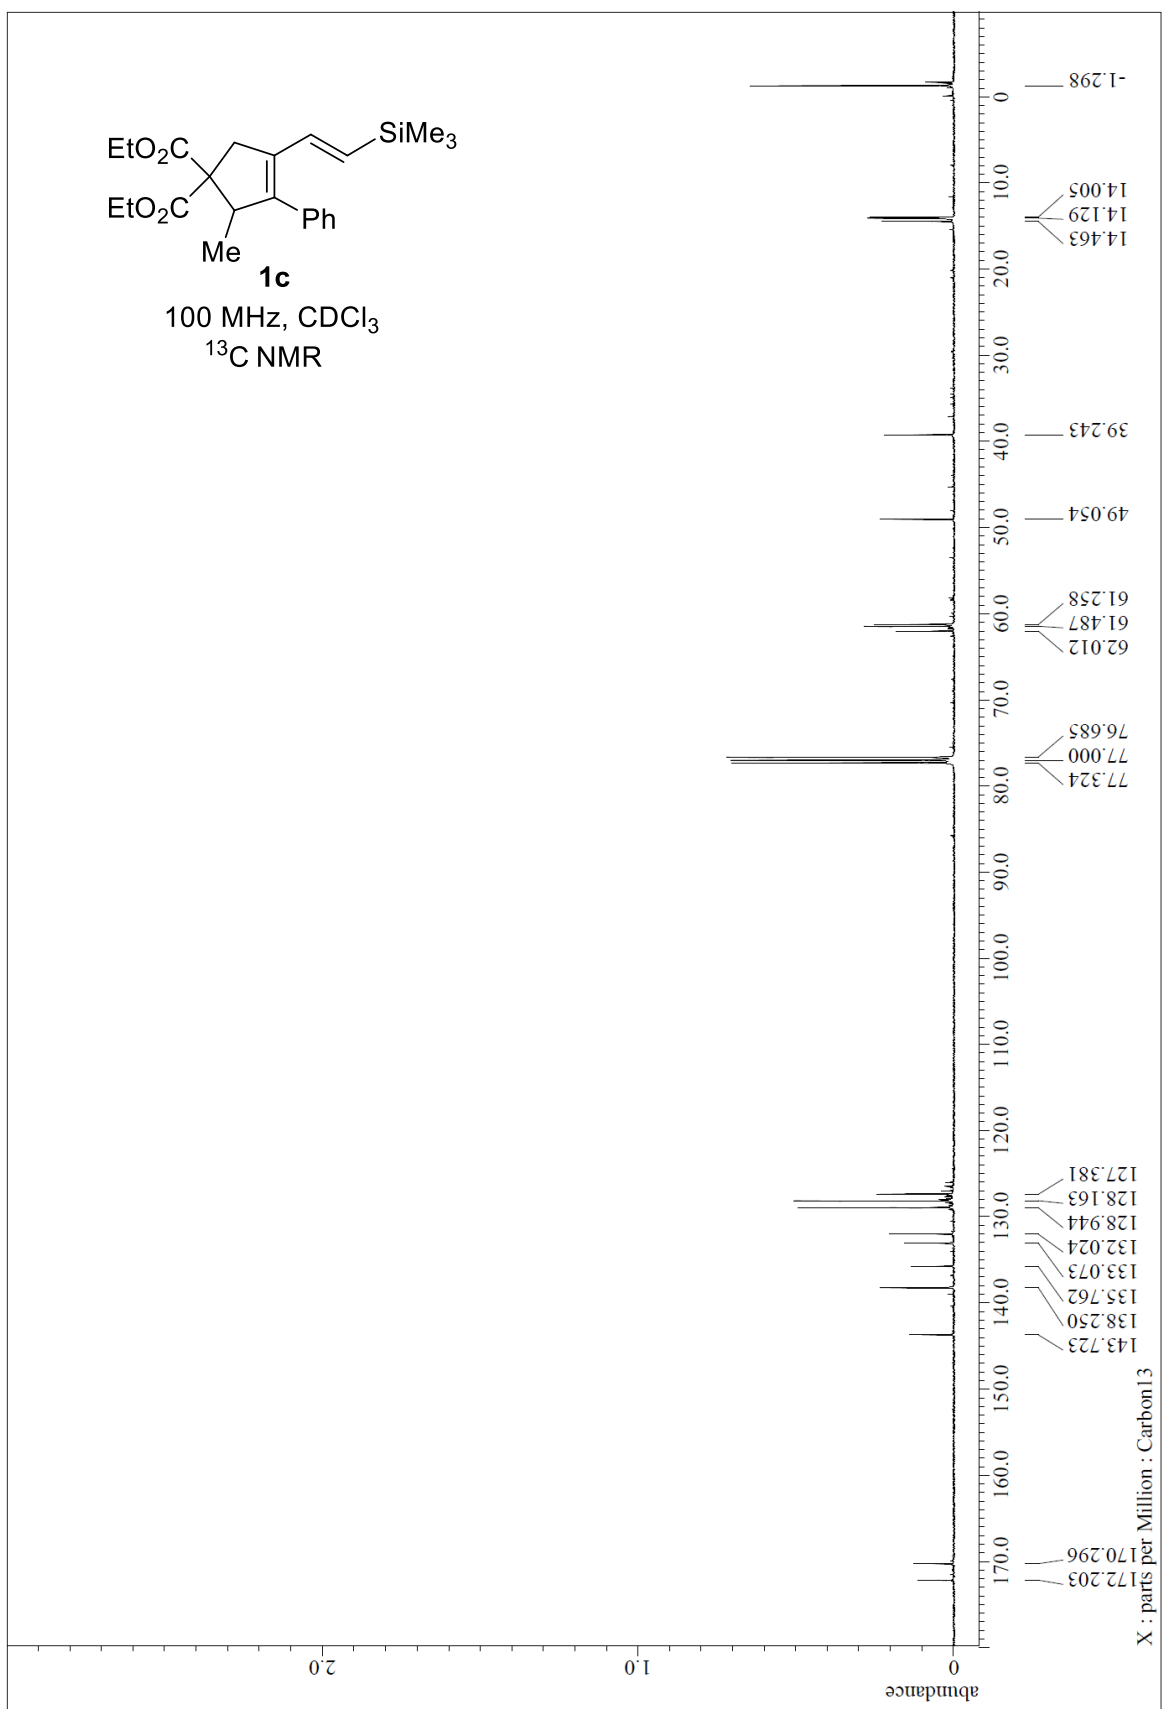

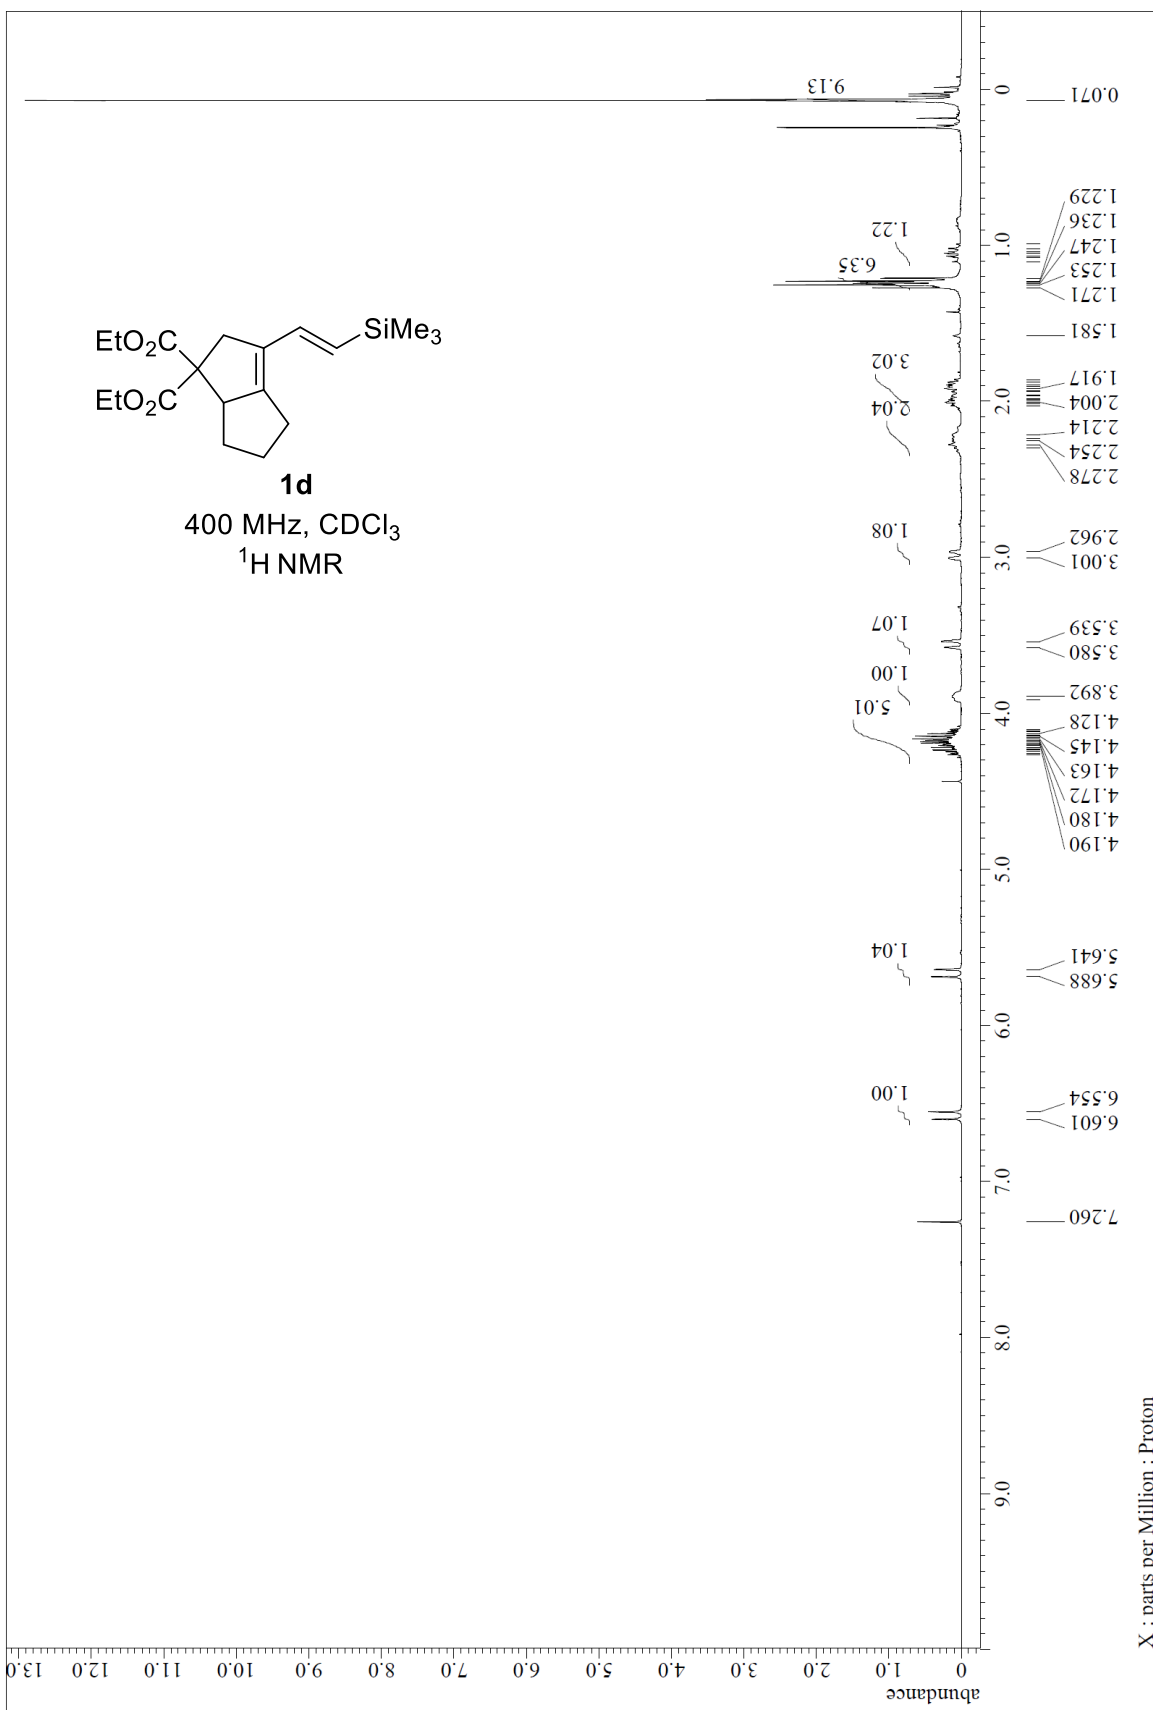

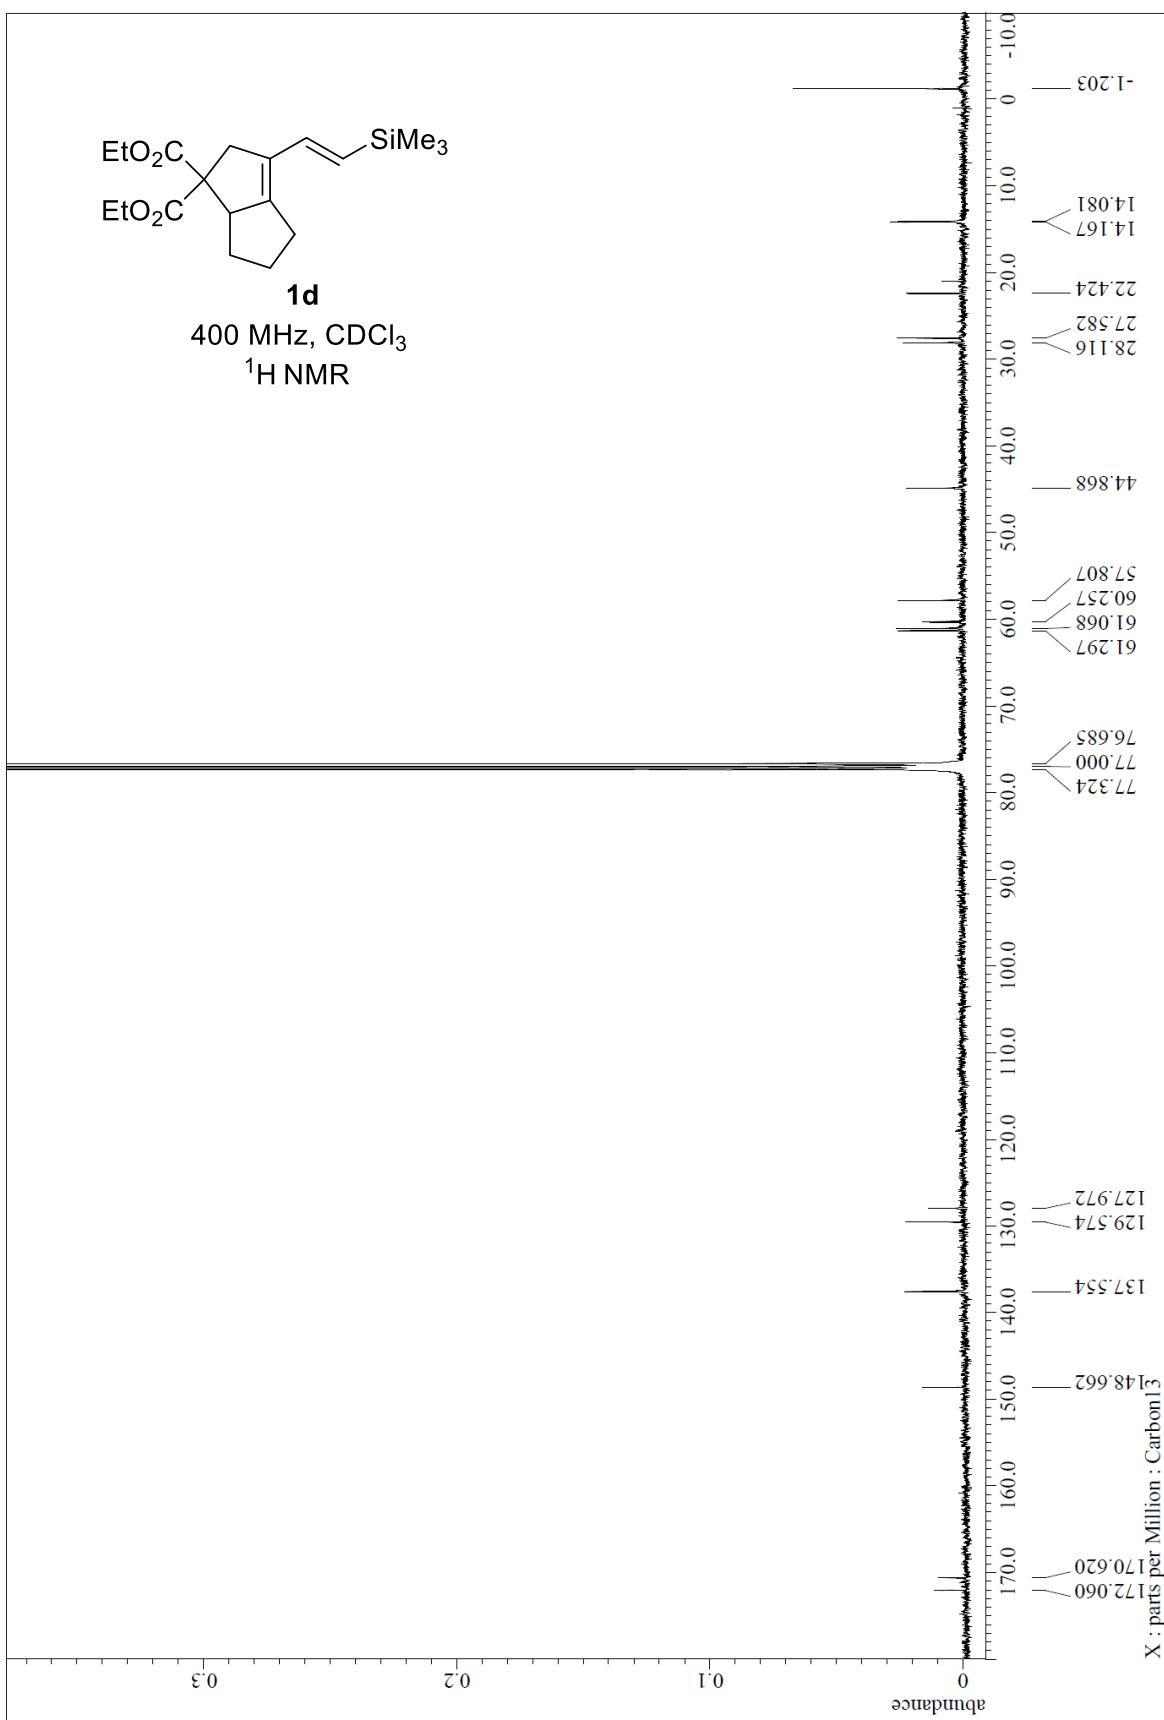

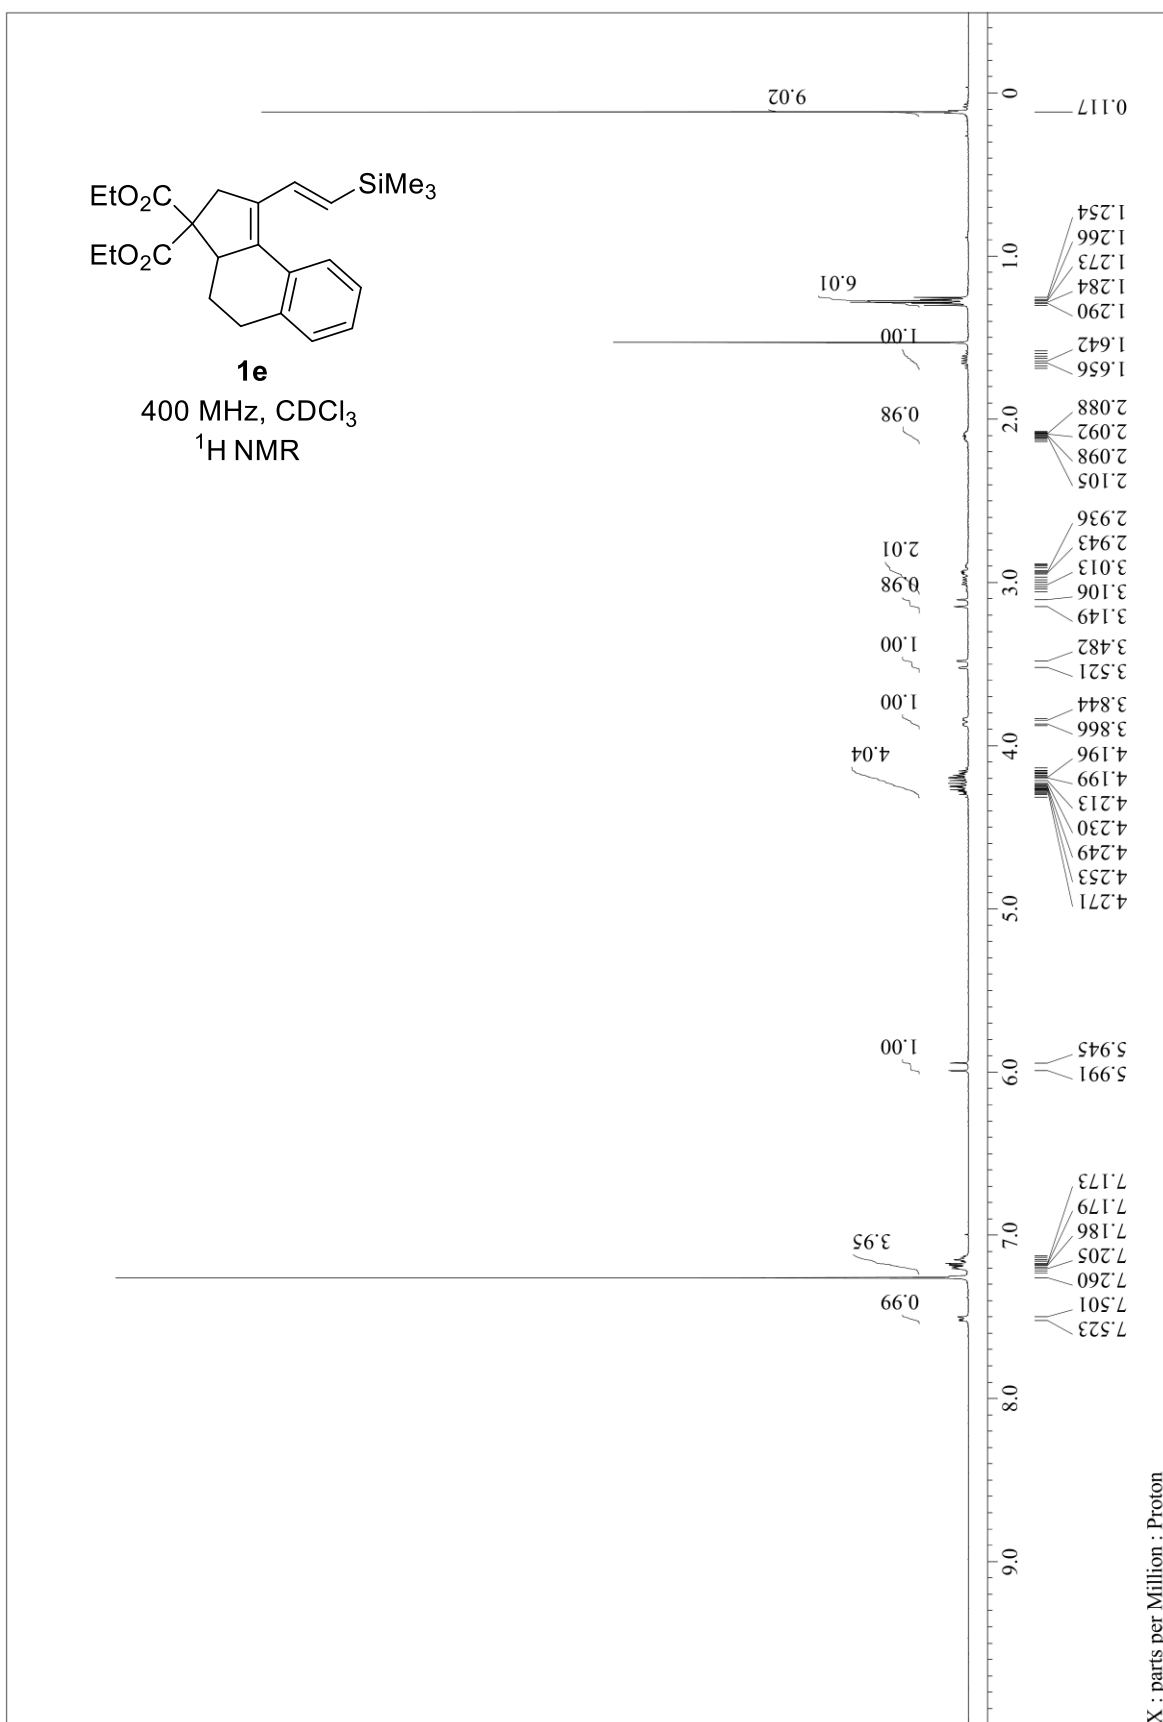

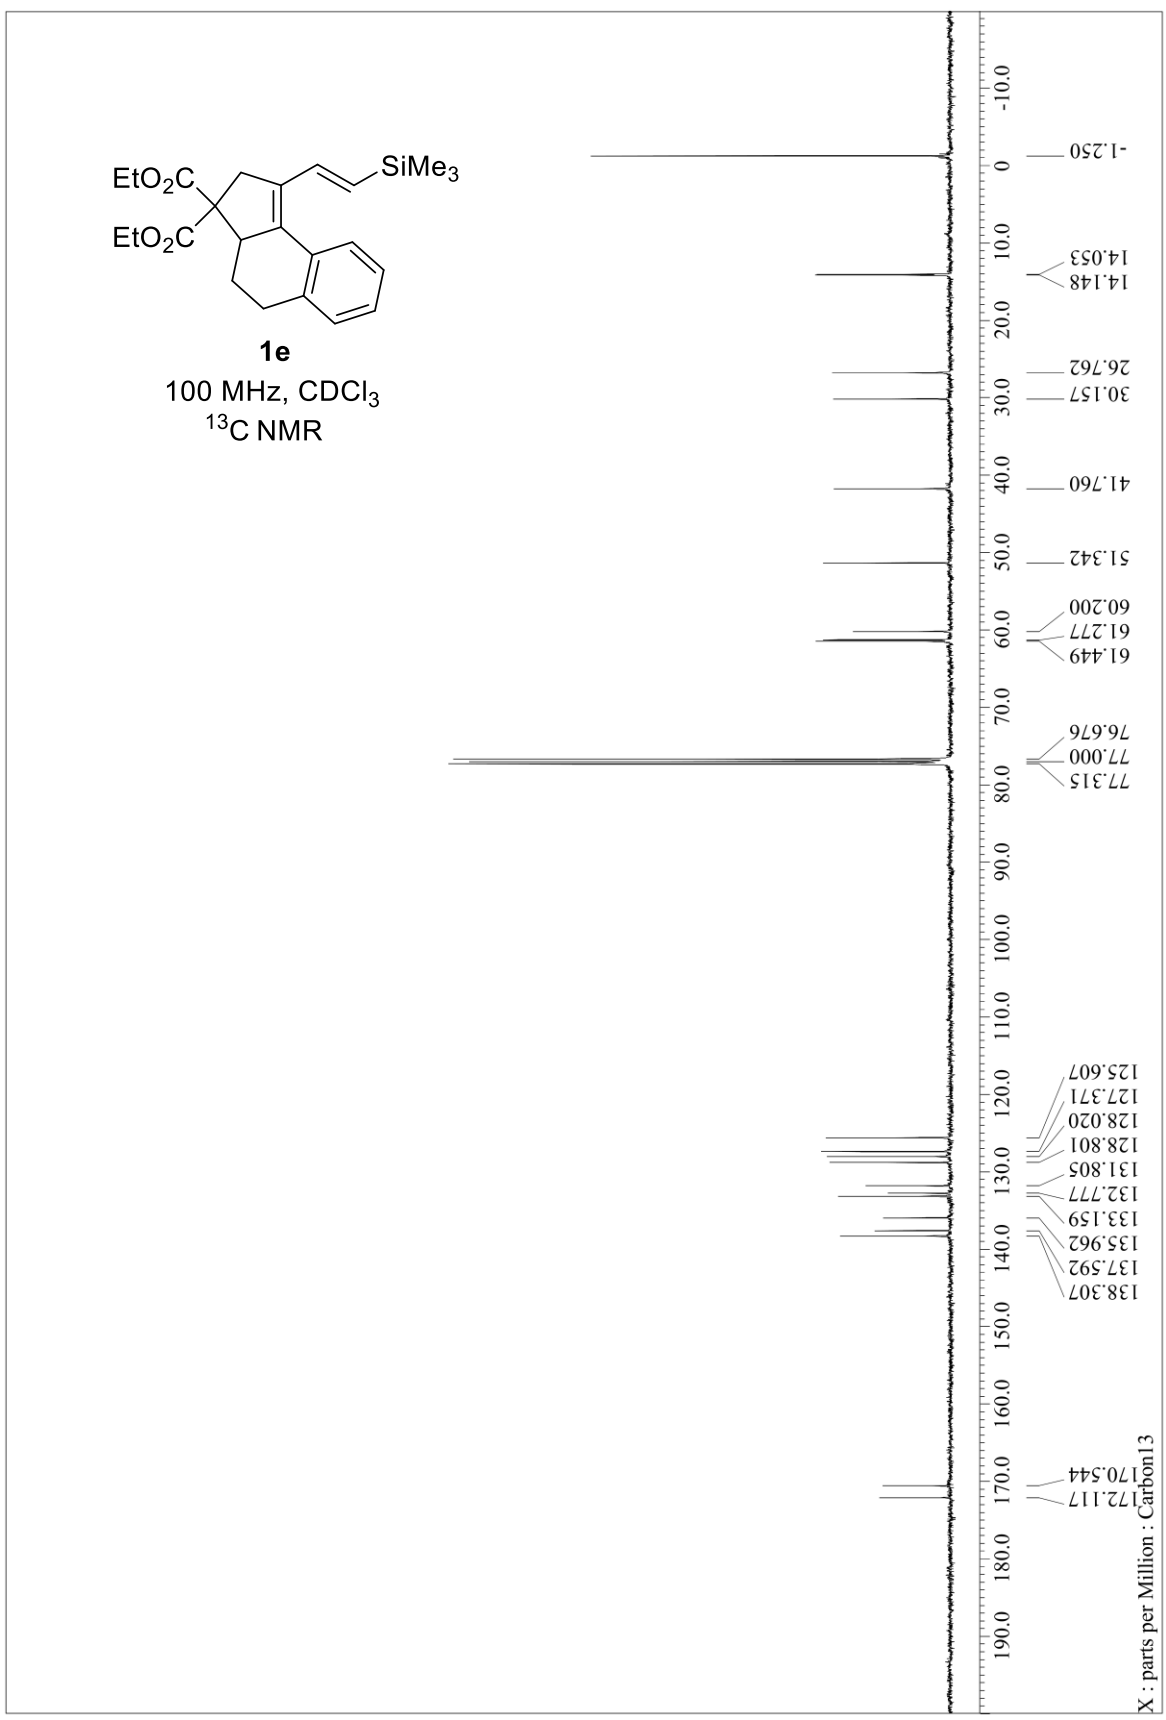

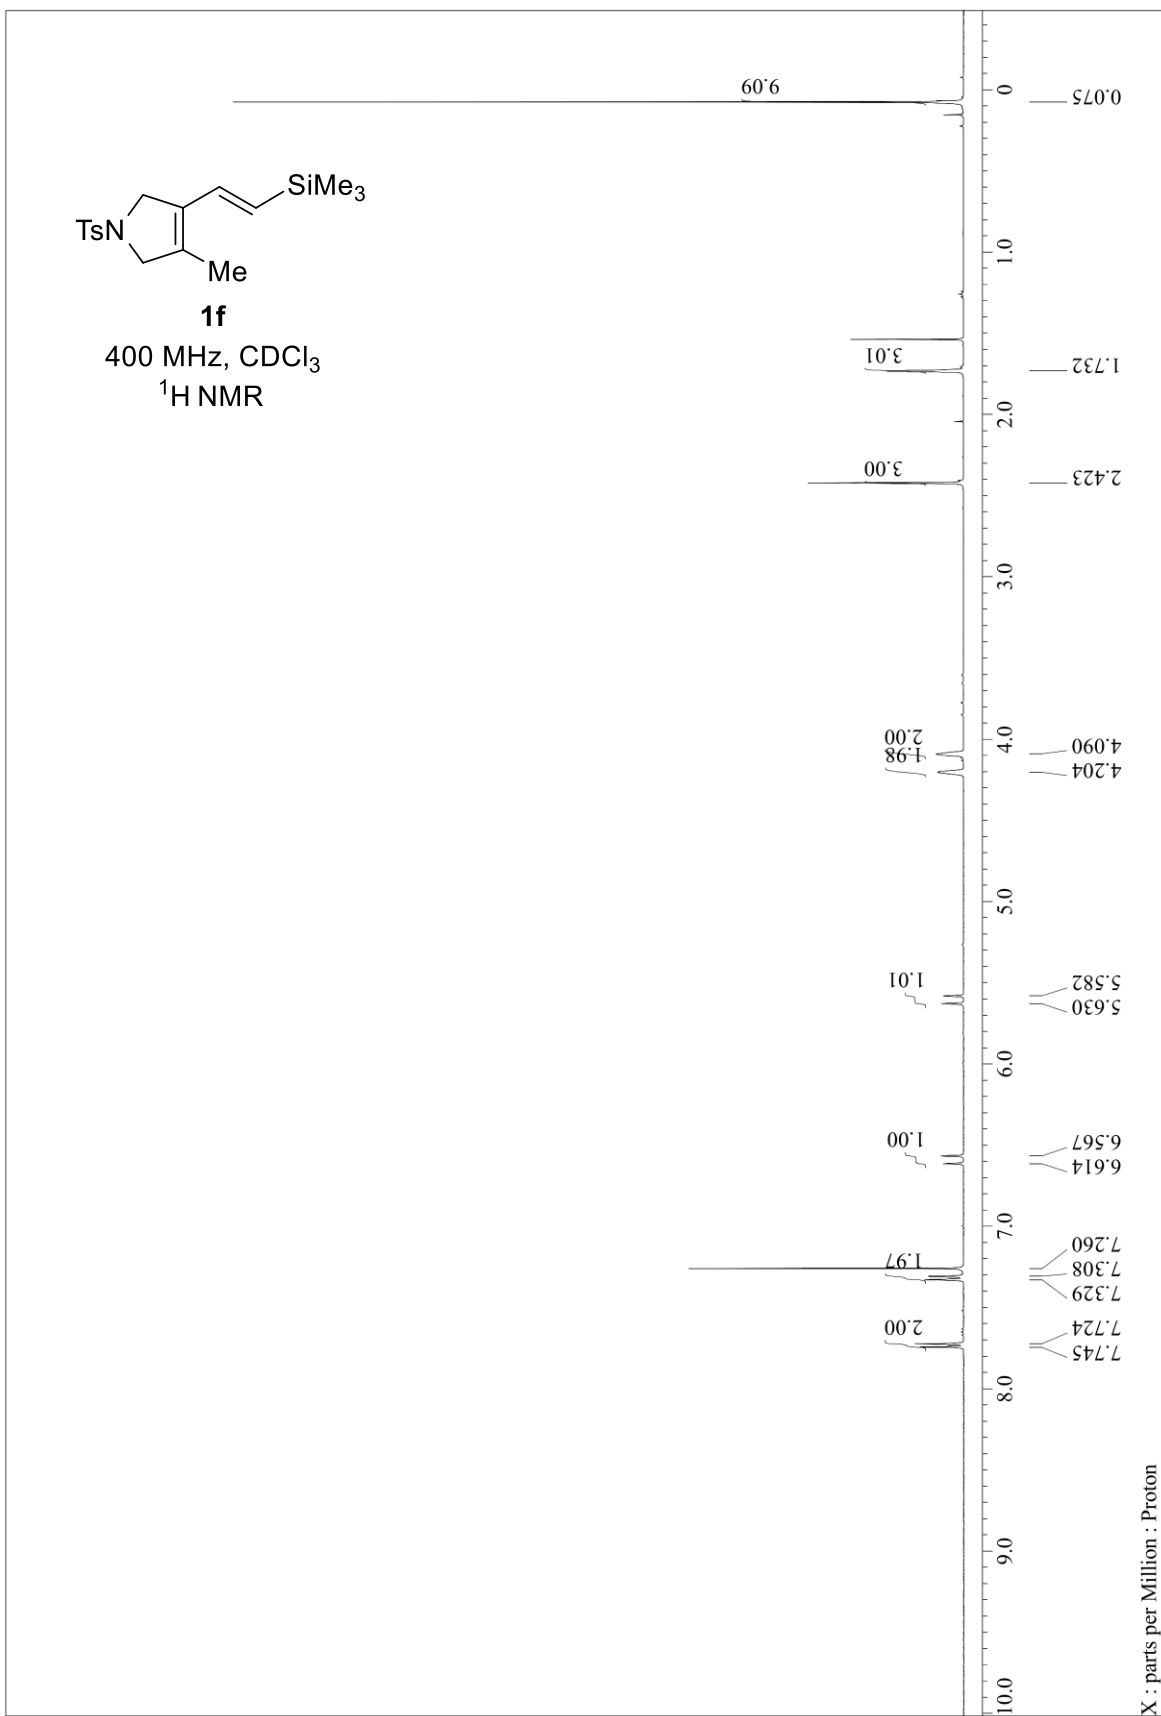

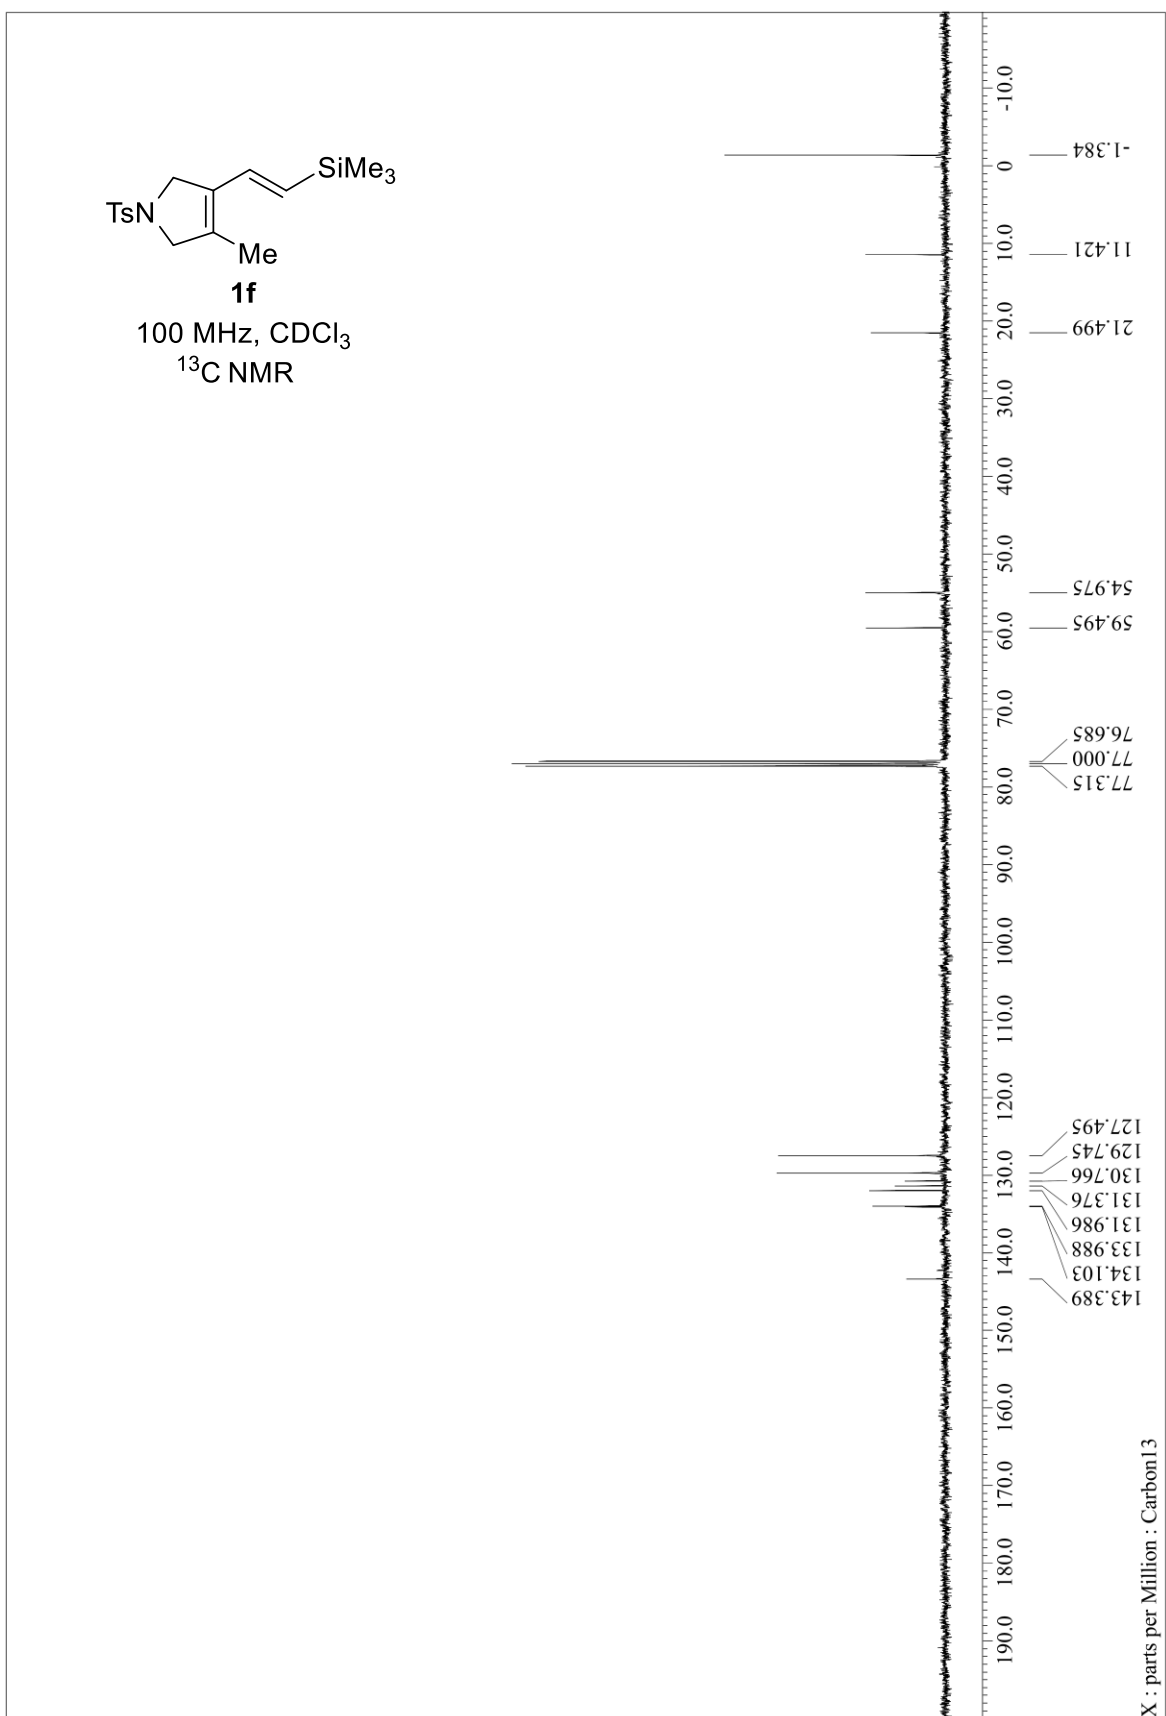

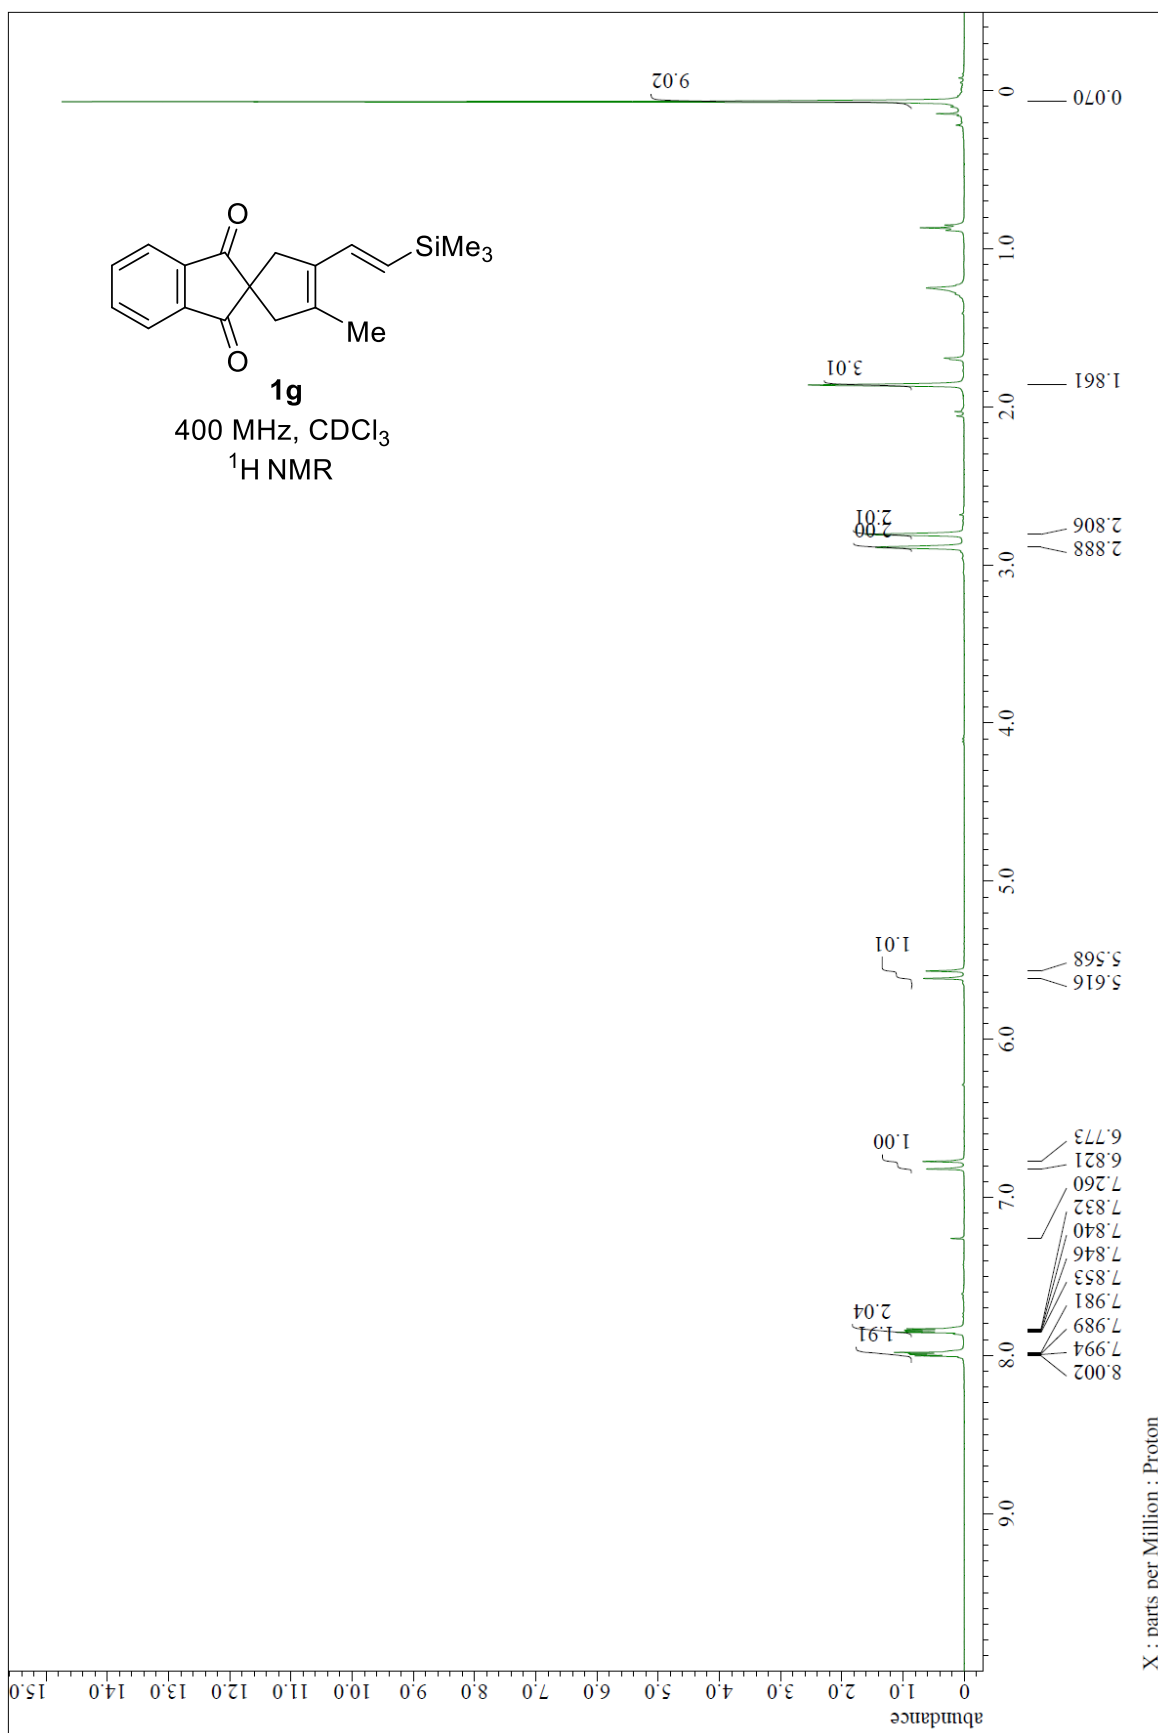



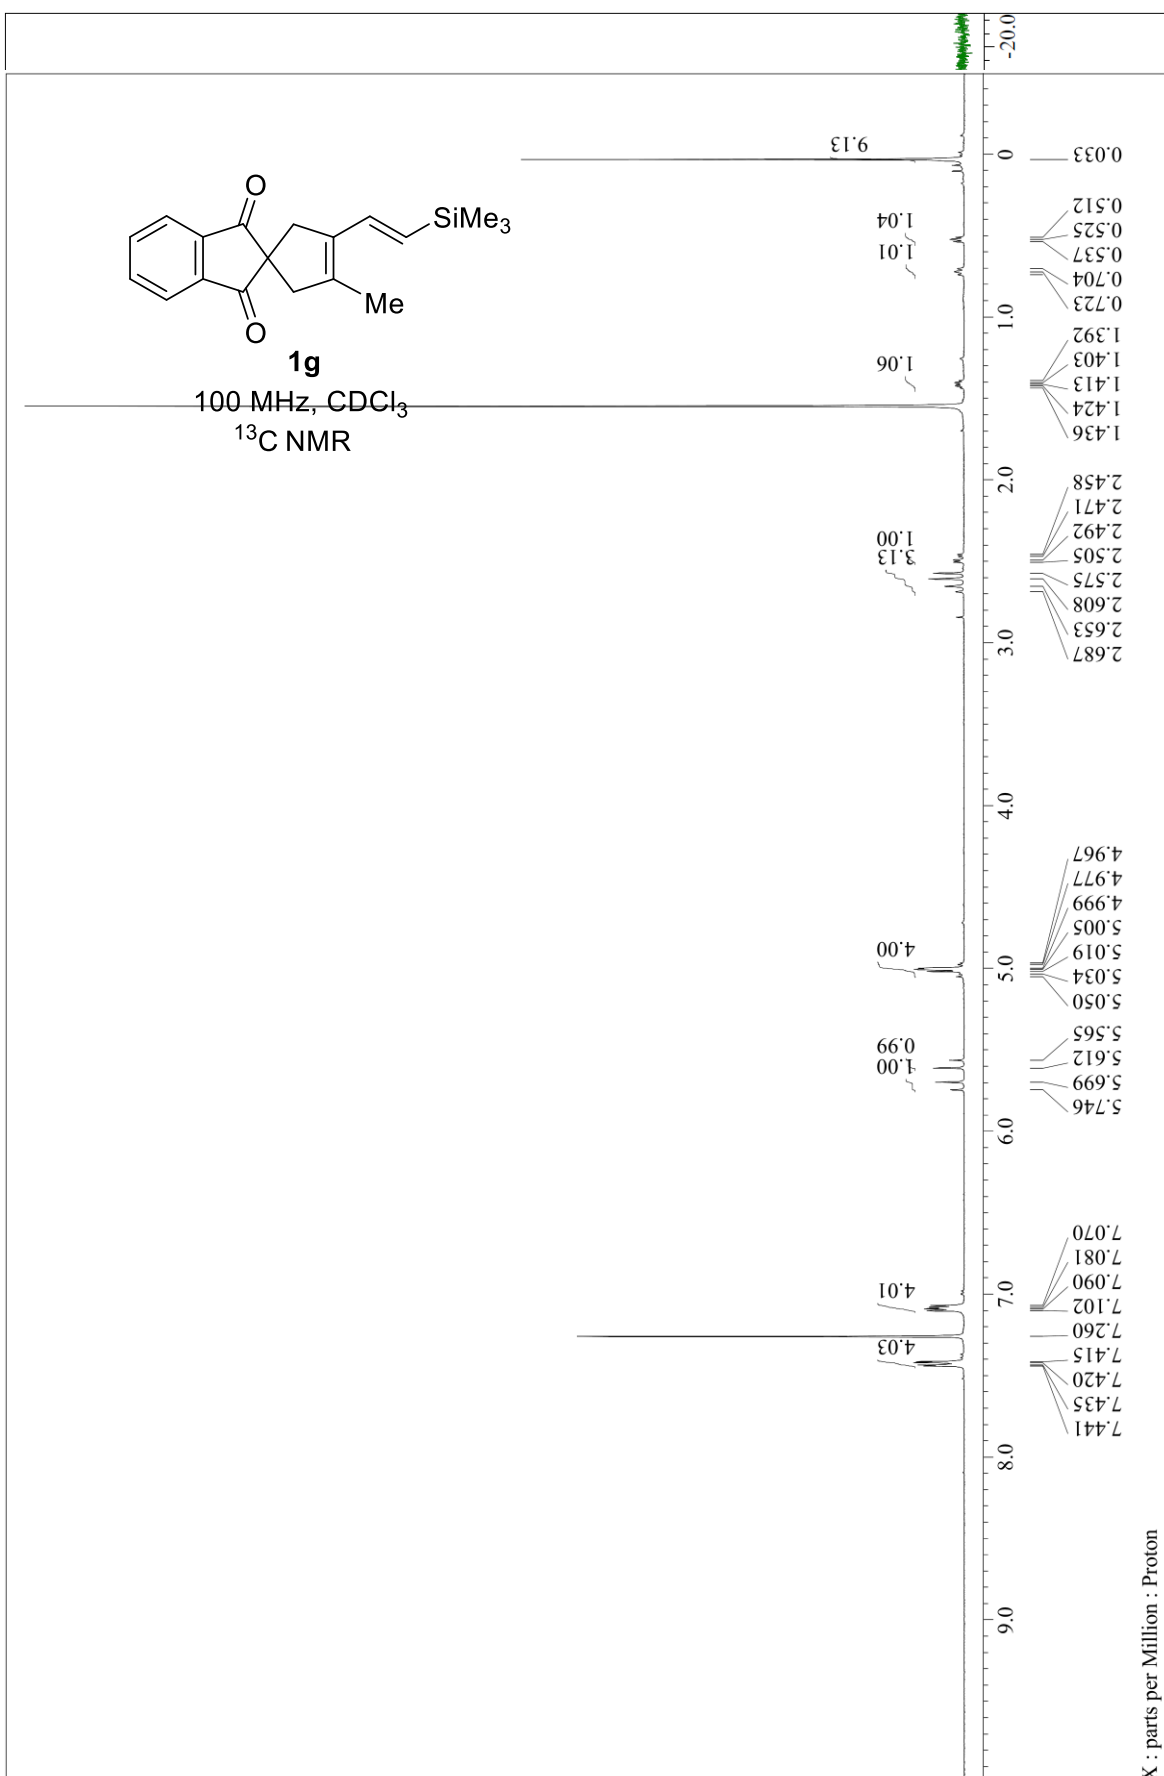

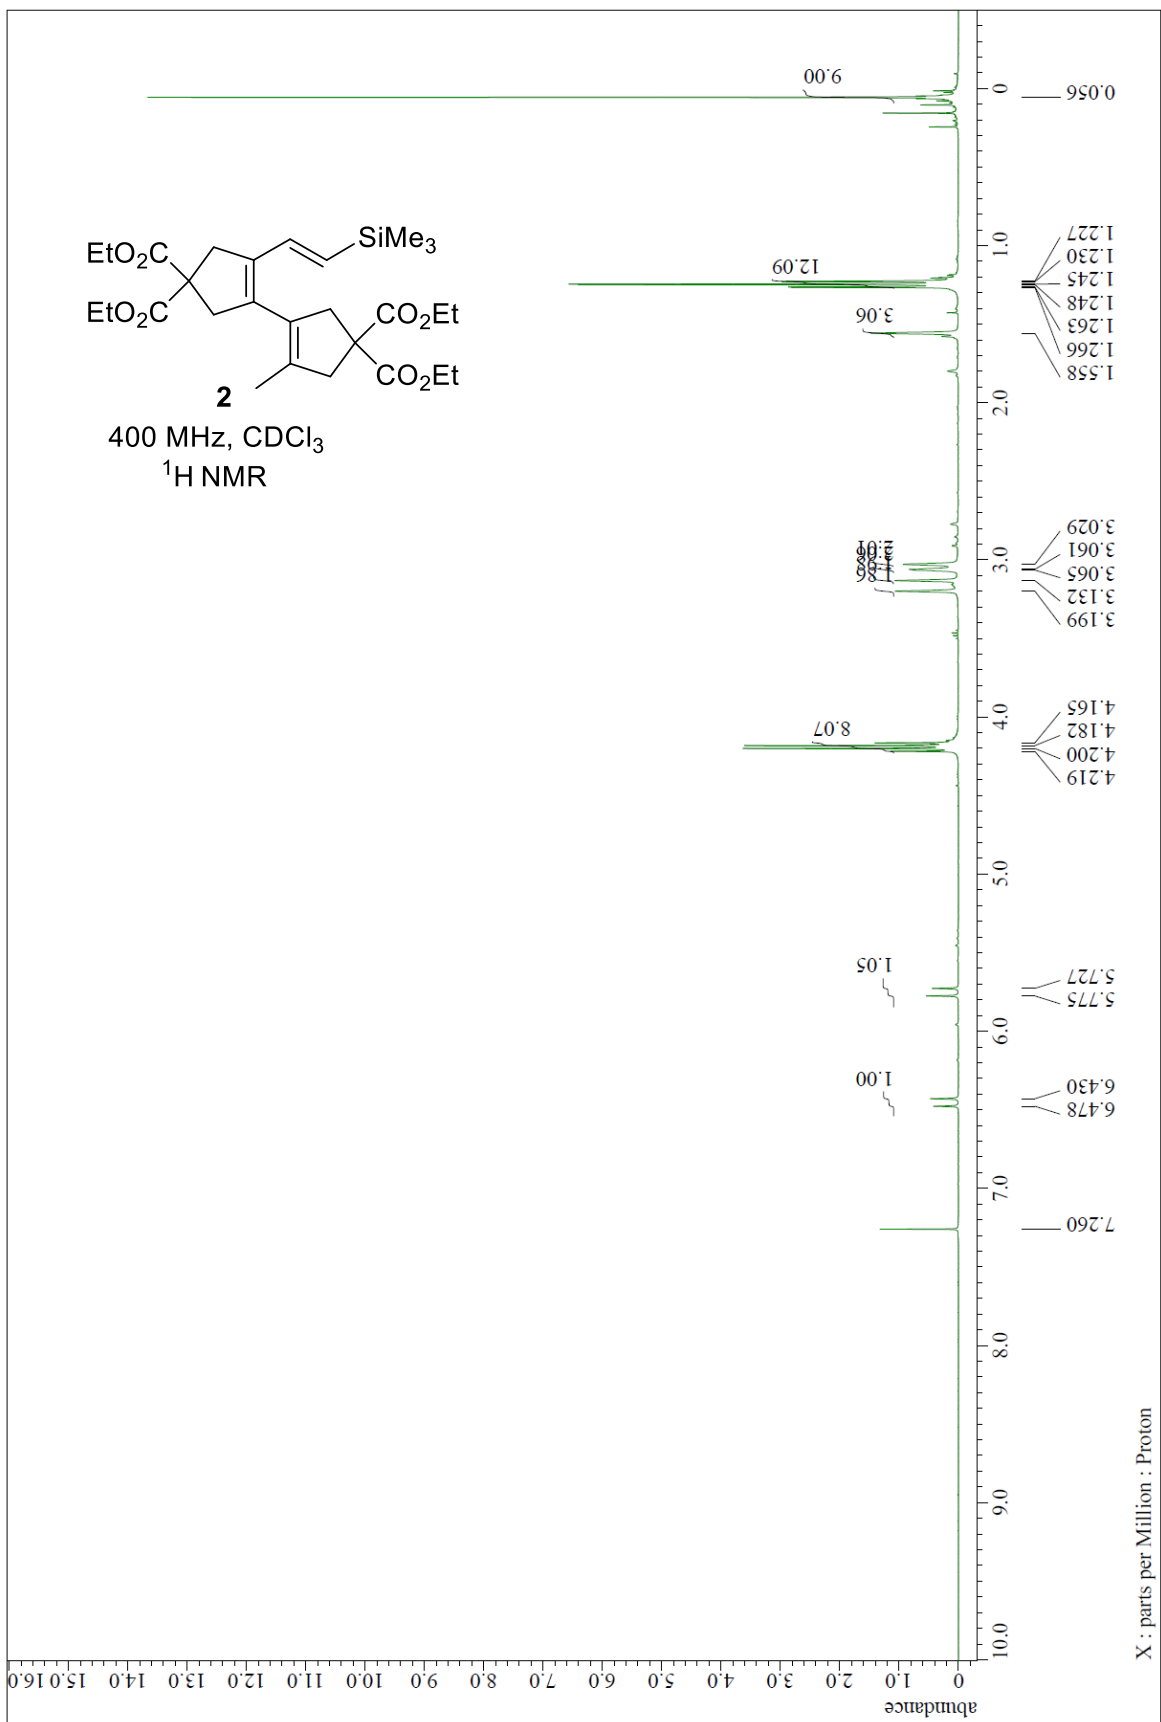

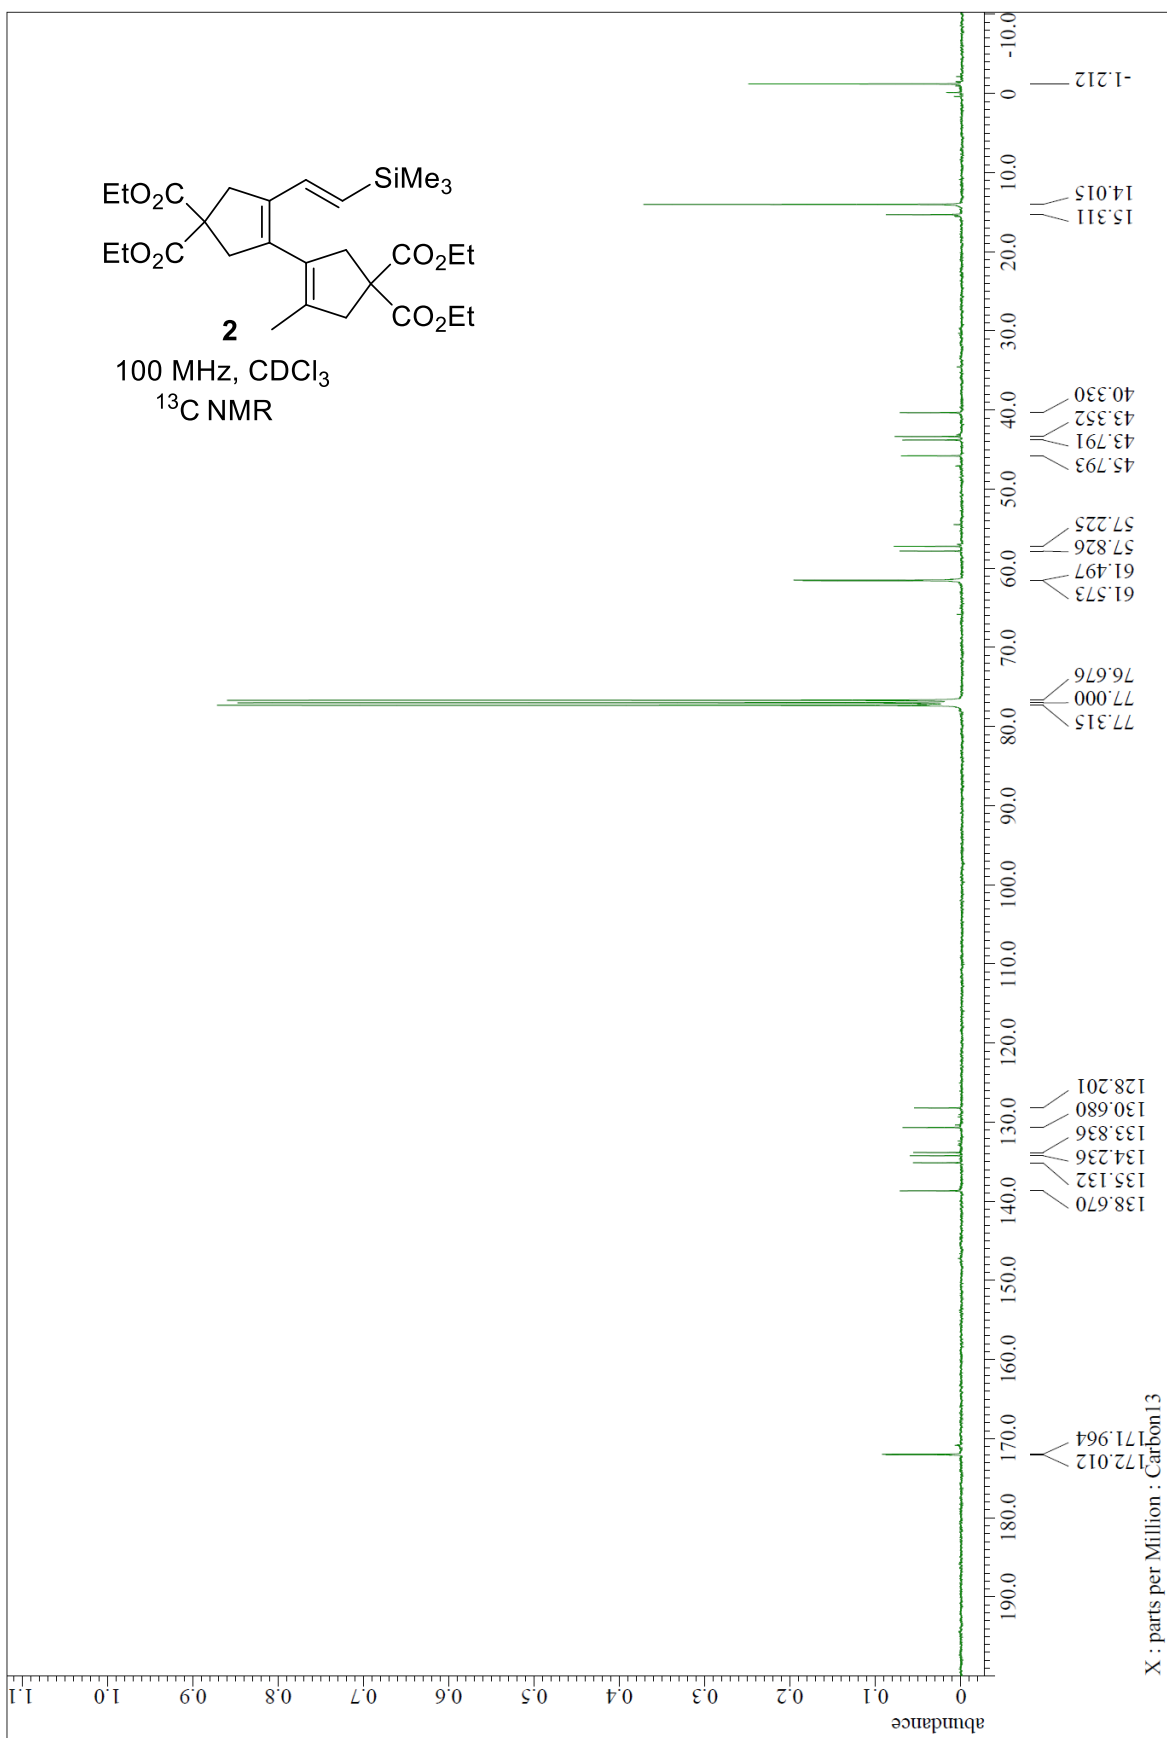

Supplement: d0cc03986a1.pdf [file d0cc03986a1.pdf]
